# Supplementary material for: A haplotype map of the human genome
Source: Springer Nature journal article supplement (doi:10.1038/nature04226), 2005-10-01

ENr112.2p16.3

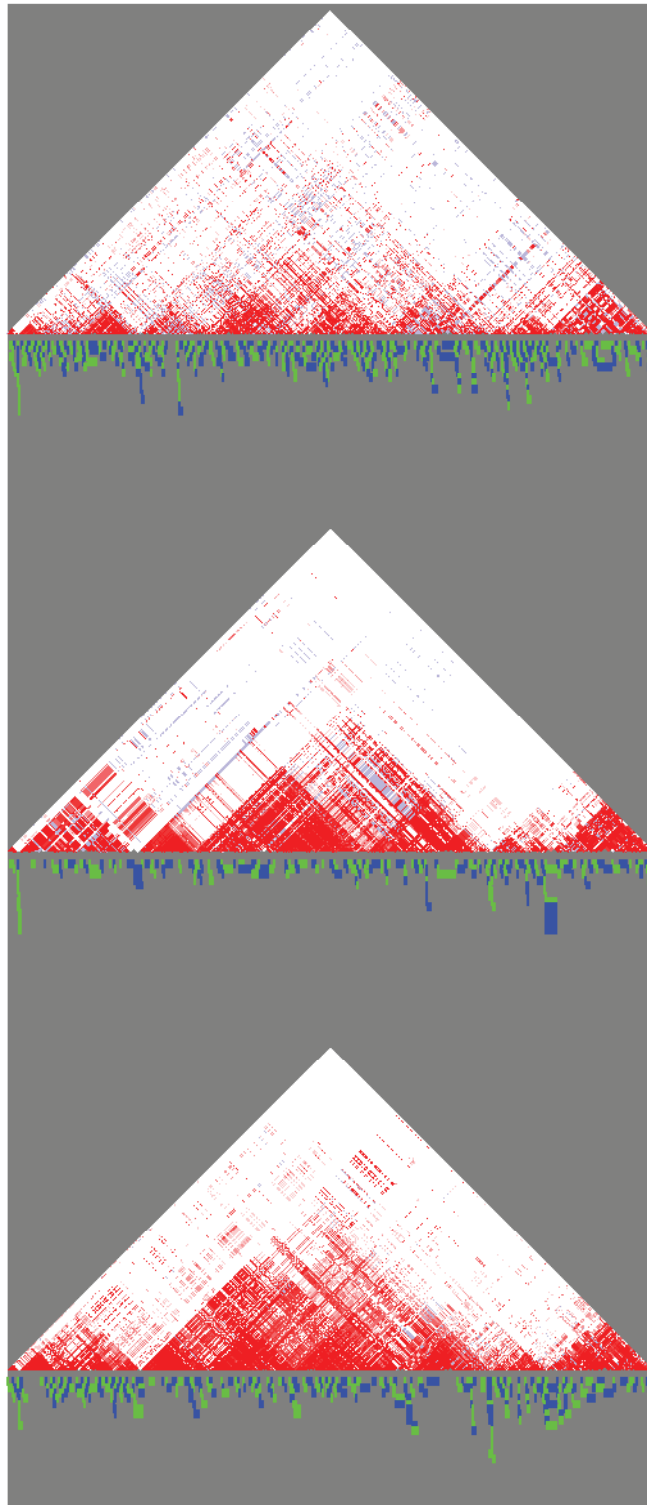

YRI

CEU

CHB+JPT

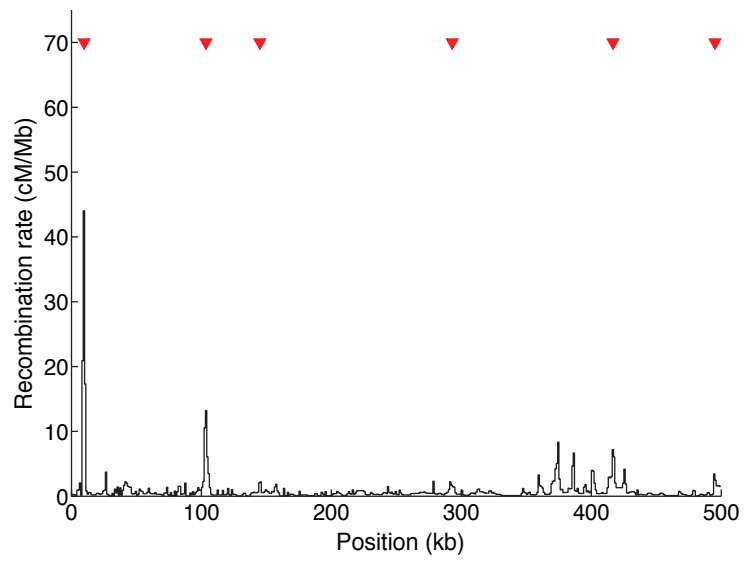

ENr131.2q37.1

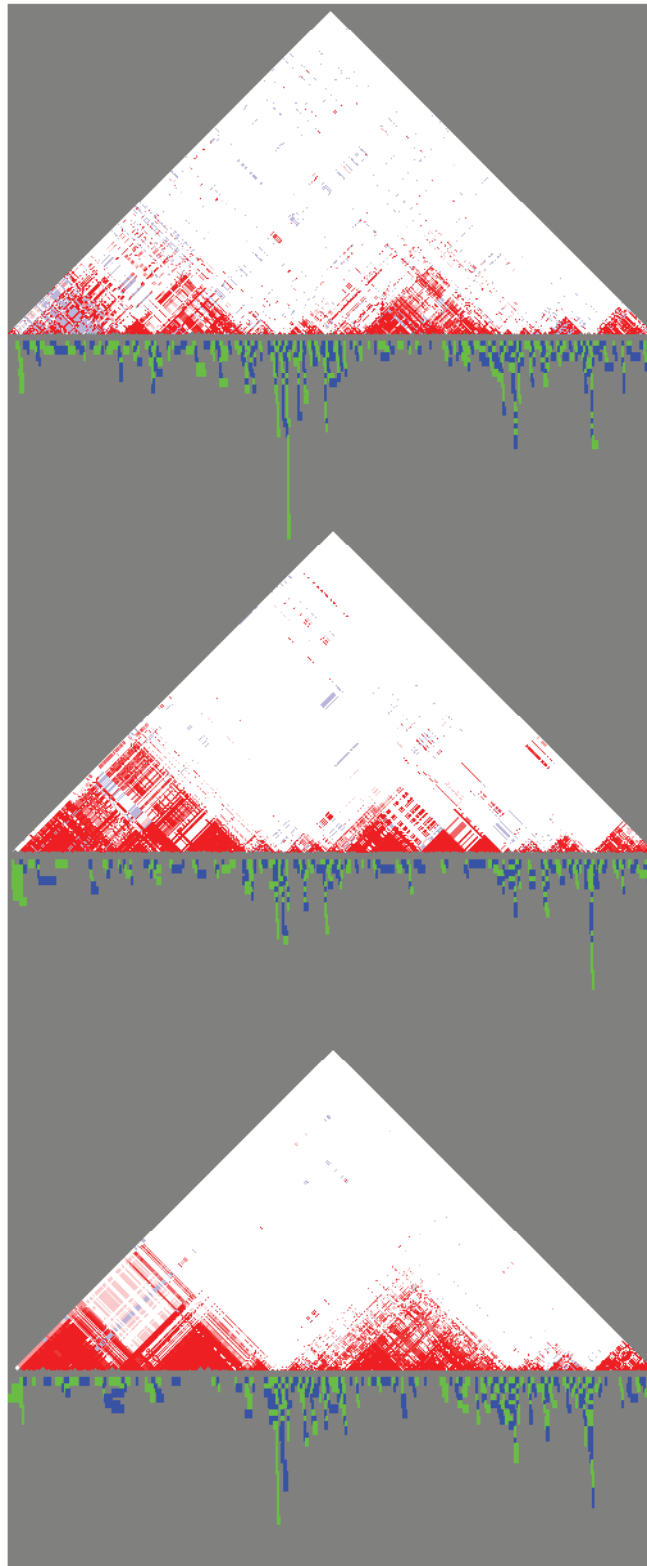

YRI

CEU

CHB+JPT

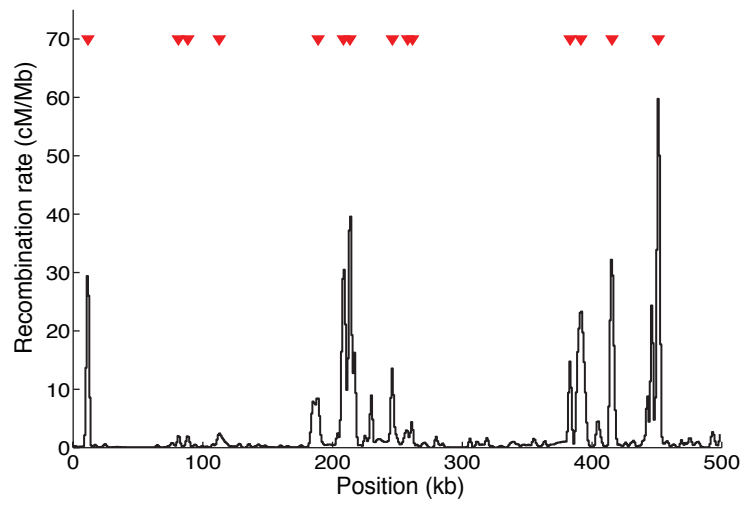

ENr113.4q26

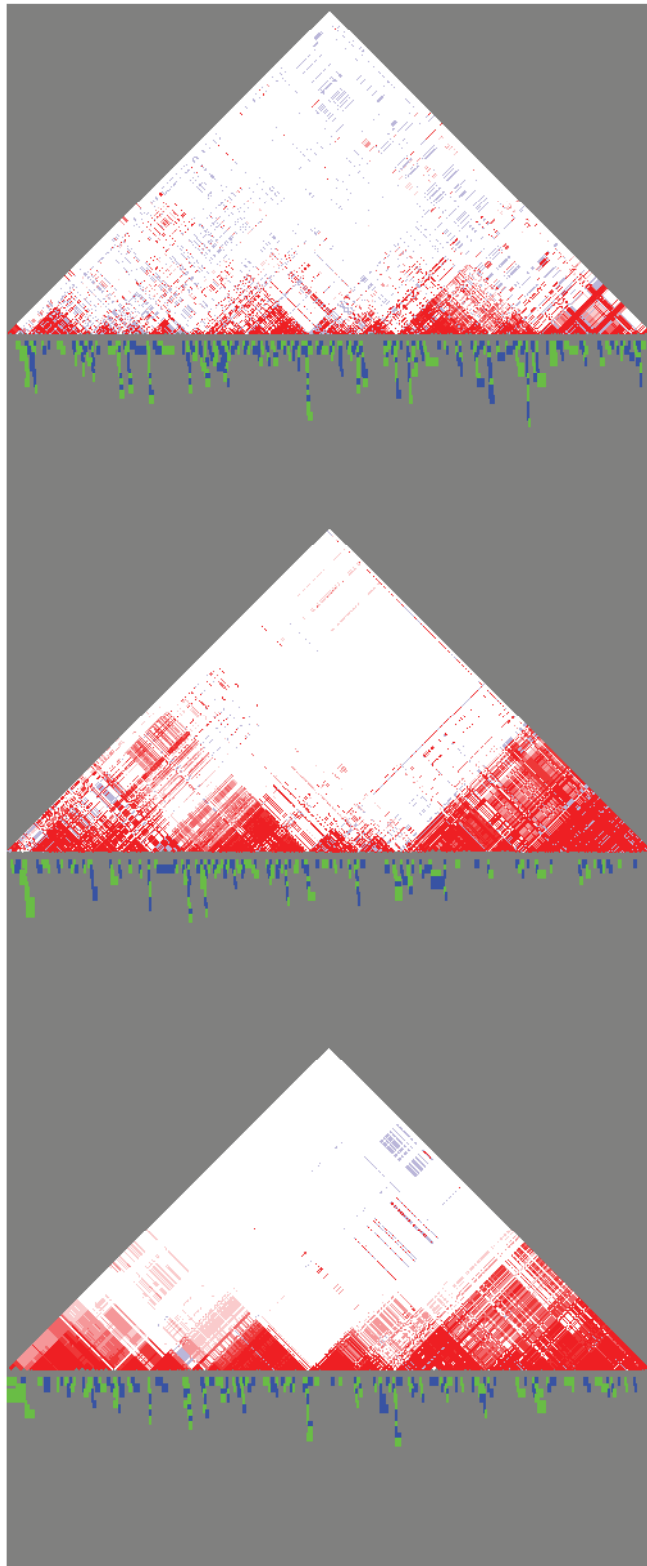

YRI

CEU

CHB+JPT

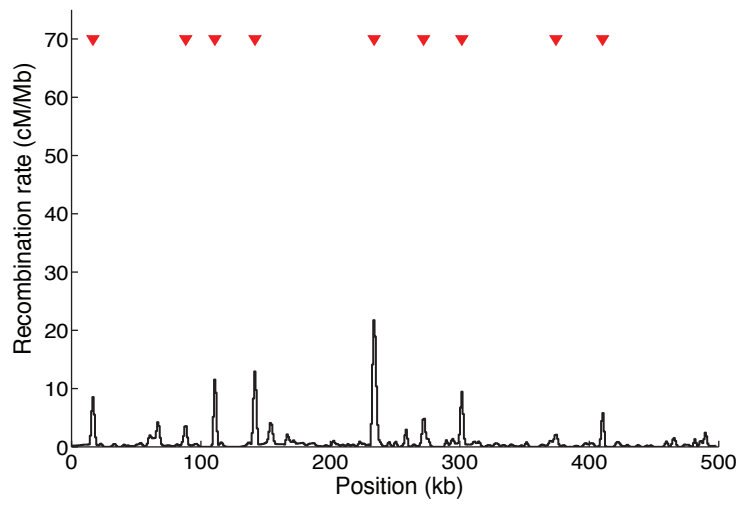

ENm010.7p15.2

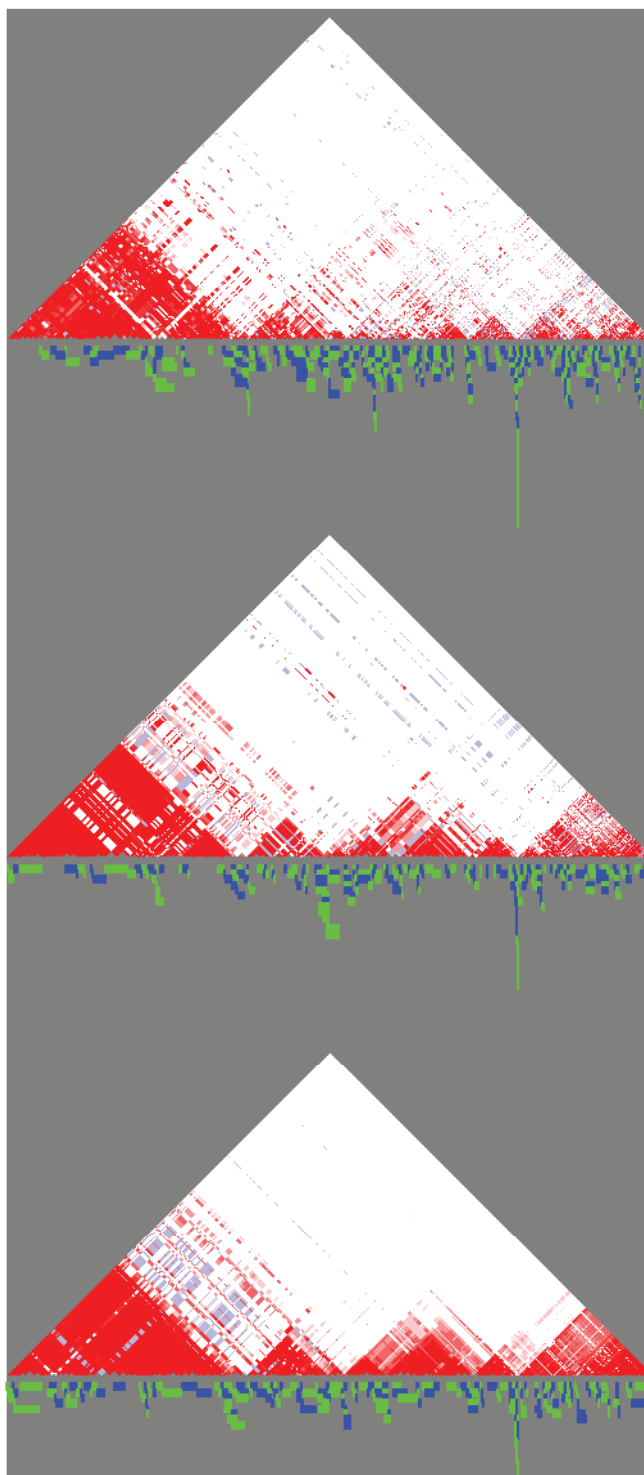

YRI

CEU

CHB+JPT

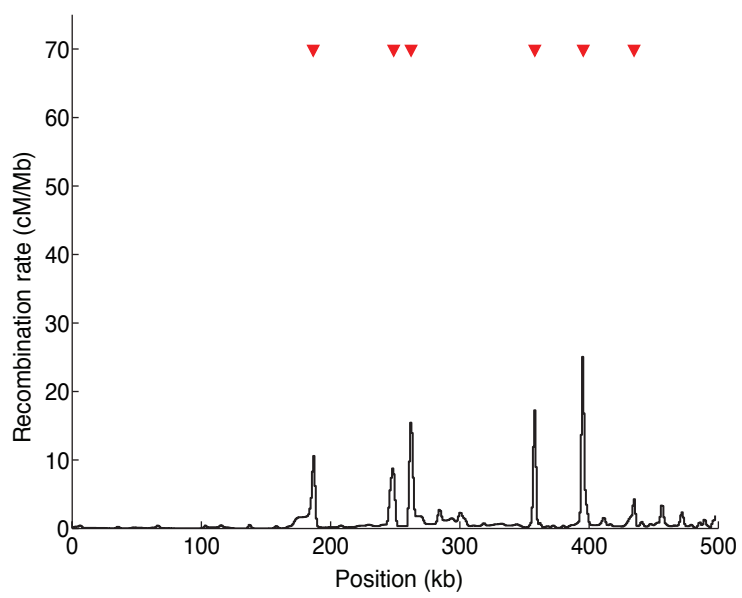

ENm013.7q21.13

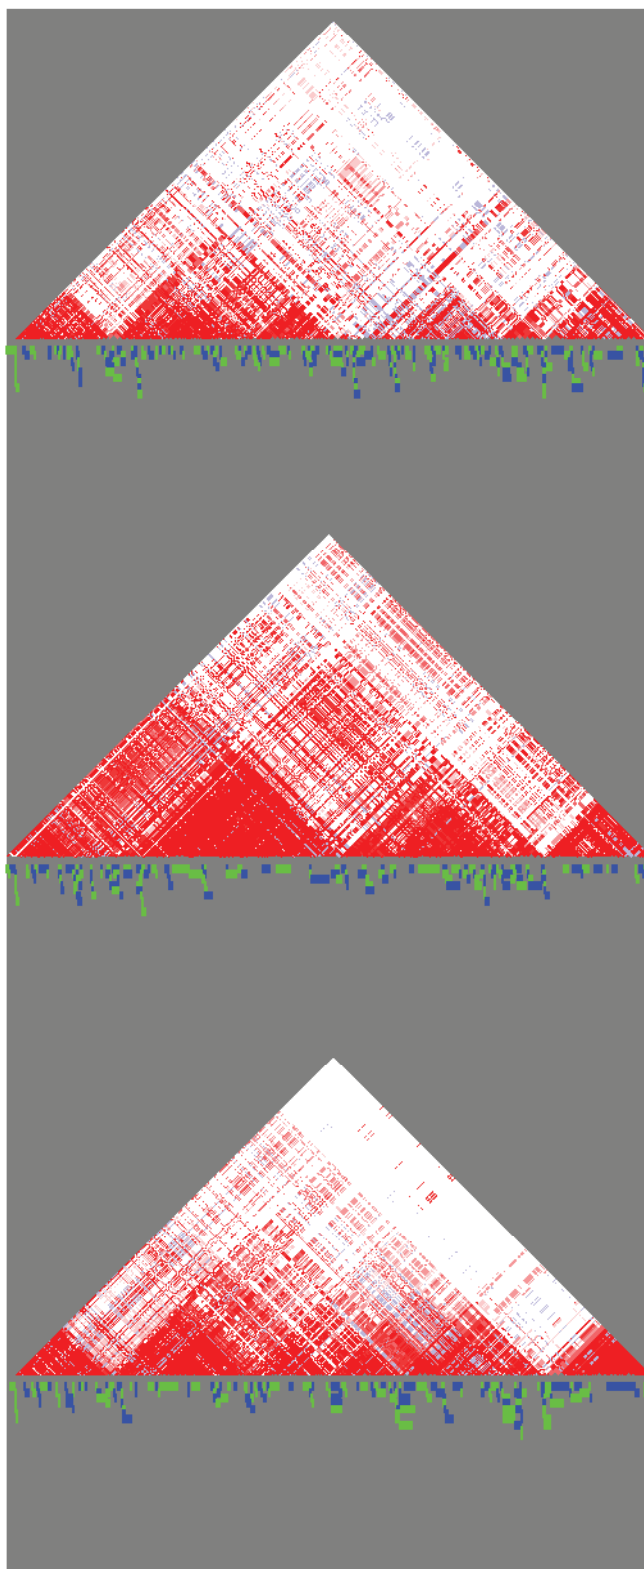

YRI

CEU

CHB+JPT

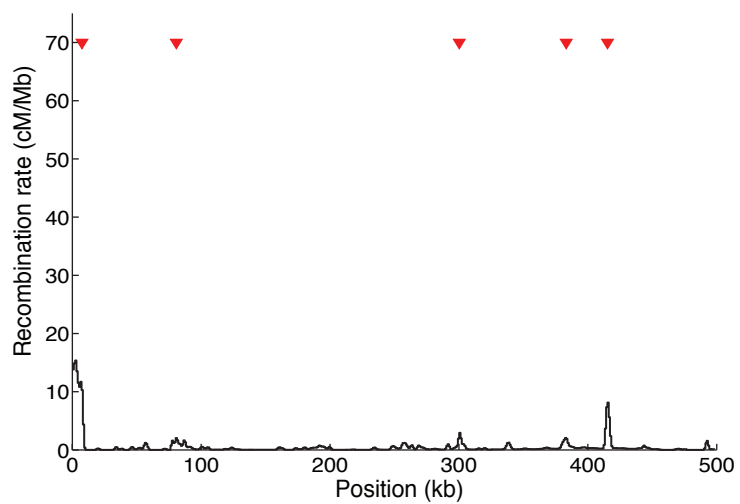

ENm014.7q31.33

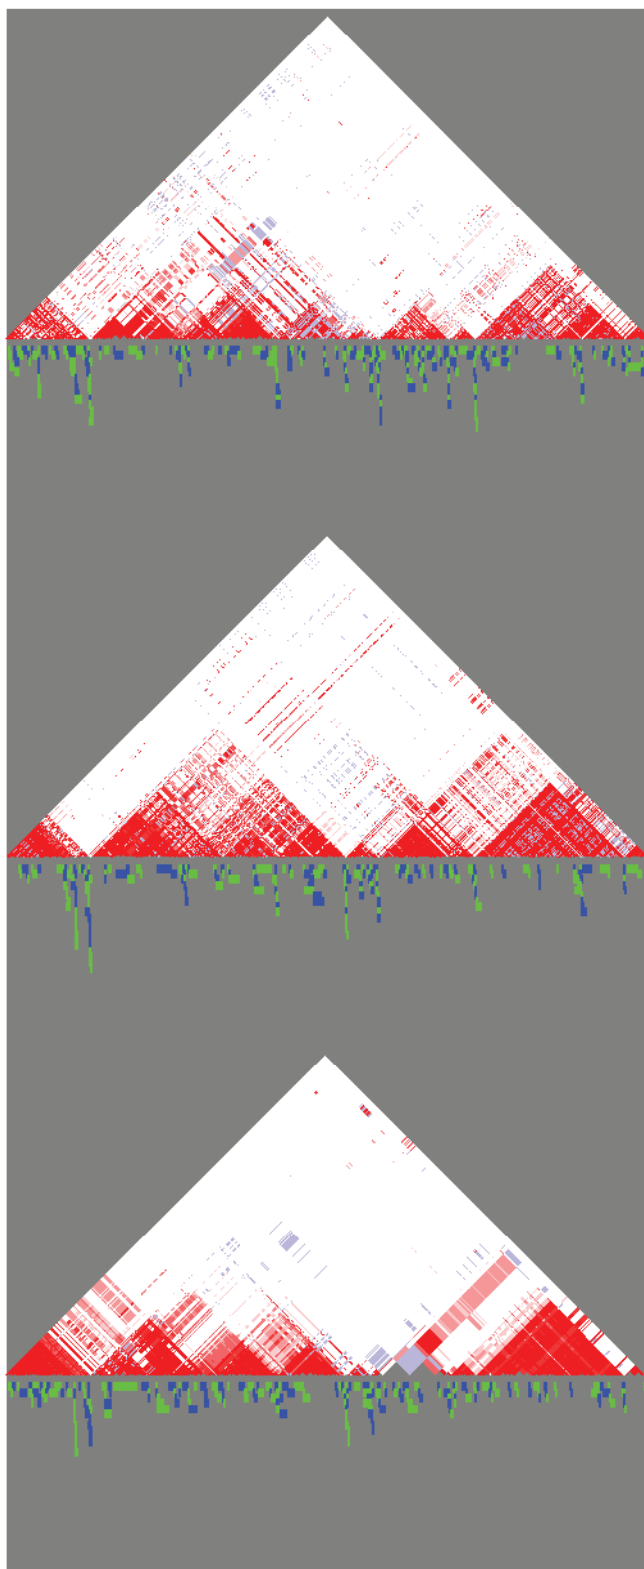

YRI

CEU

CHB+JPT

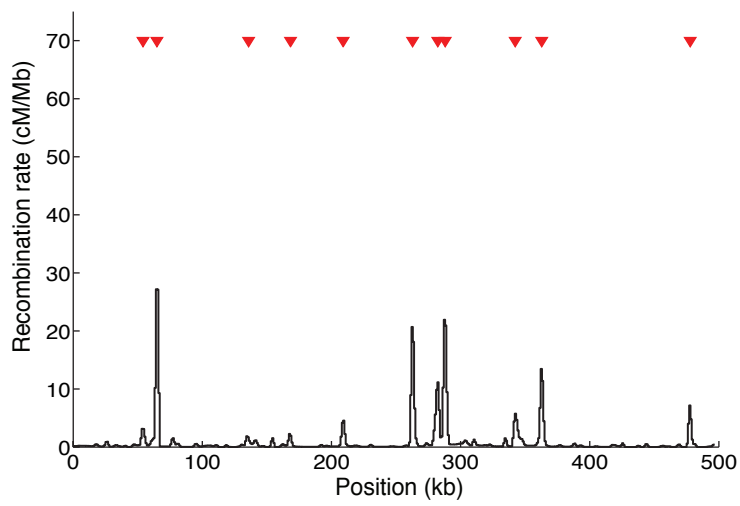

ENr321.8q24.11

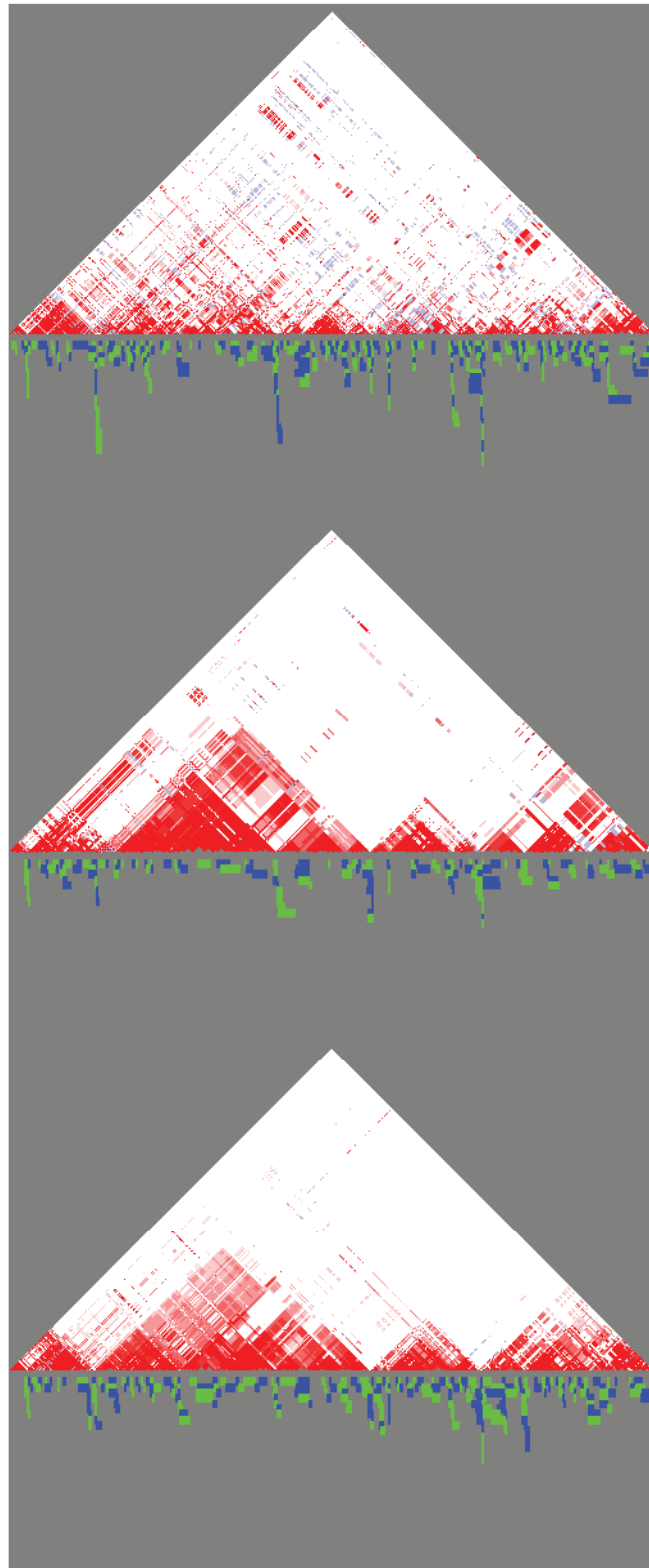

YRI

CEU

CHB+JPT

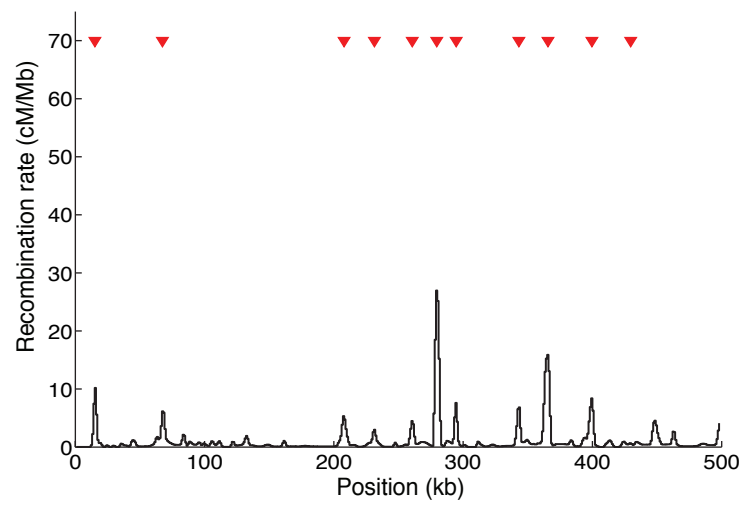

ENr232.9q34.11

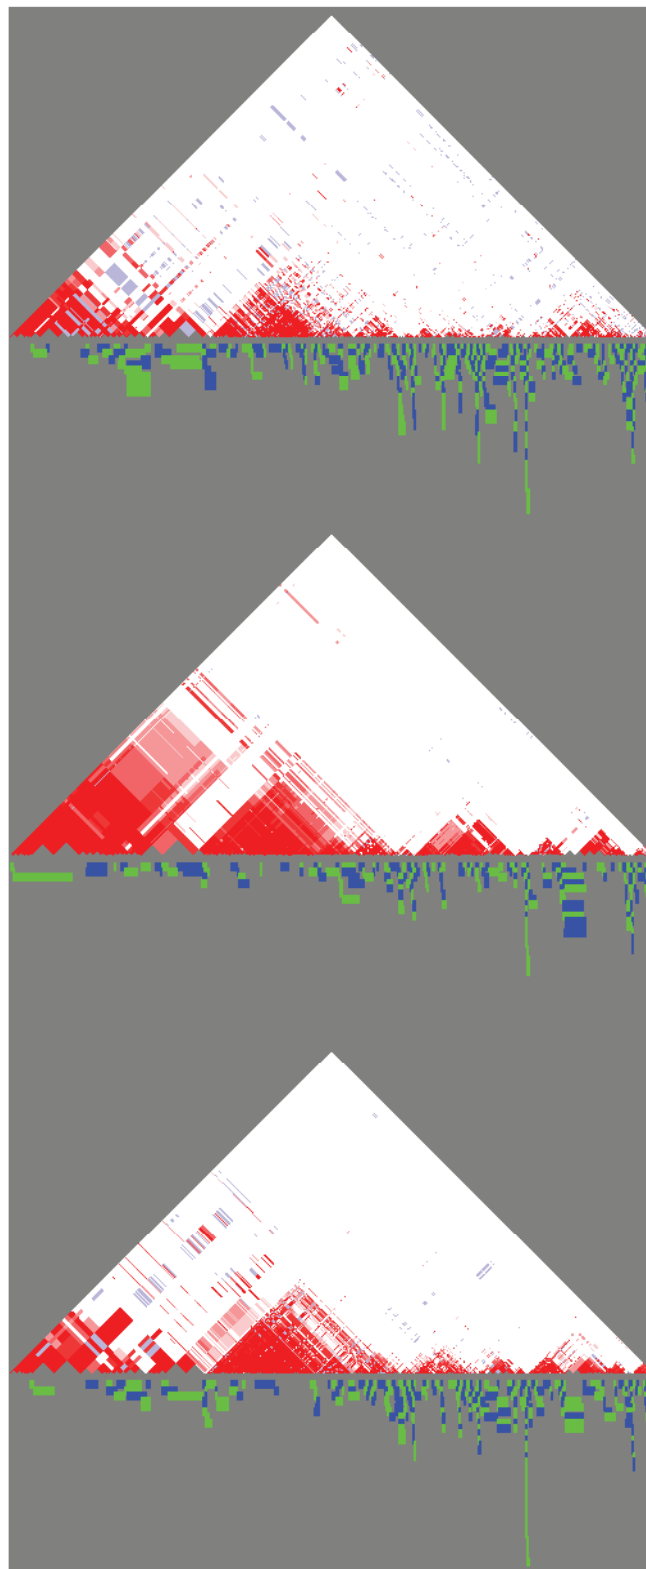

YRI

CEU

CHB+JPT

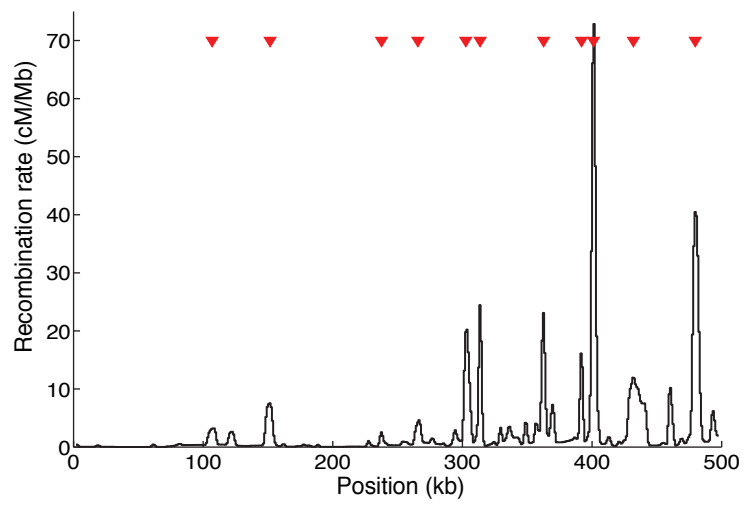



ENr123.12q12

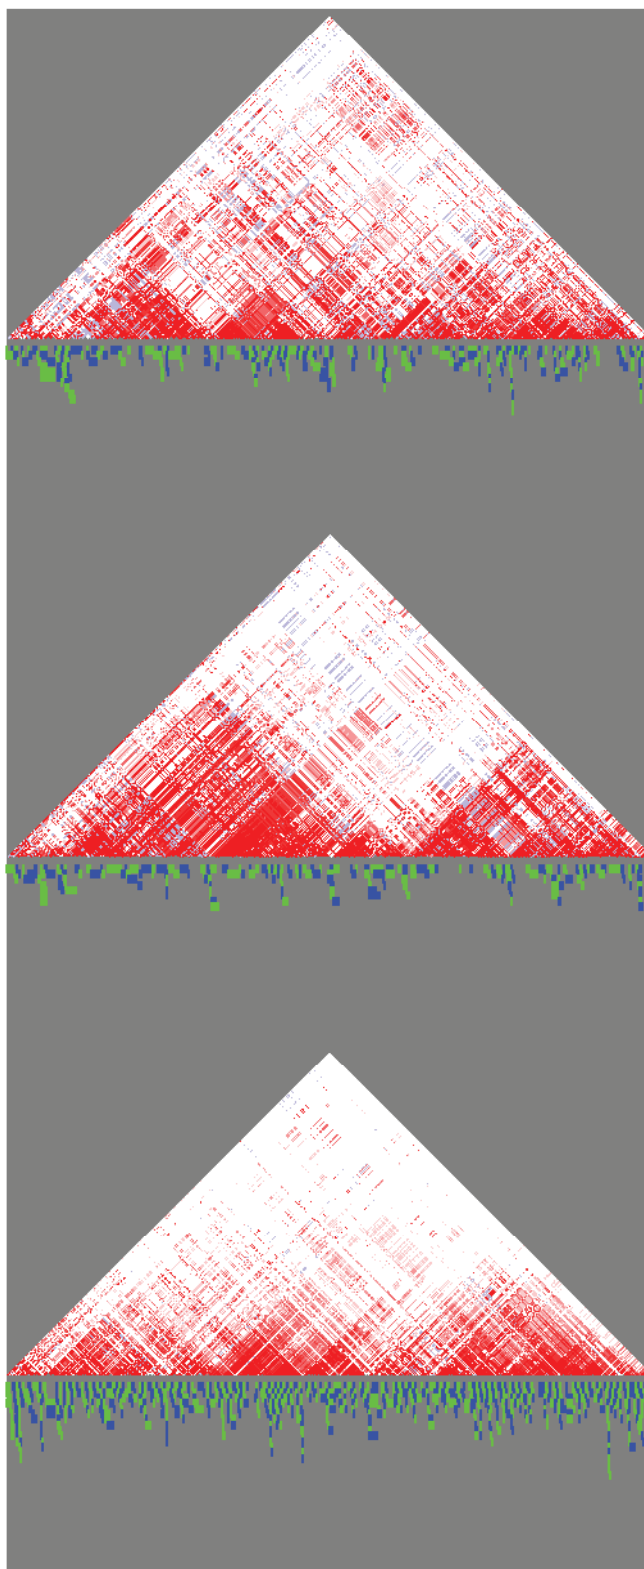

YRI

CEU

CHB+JPT

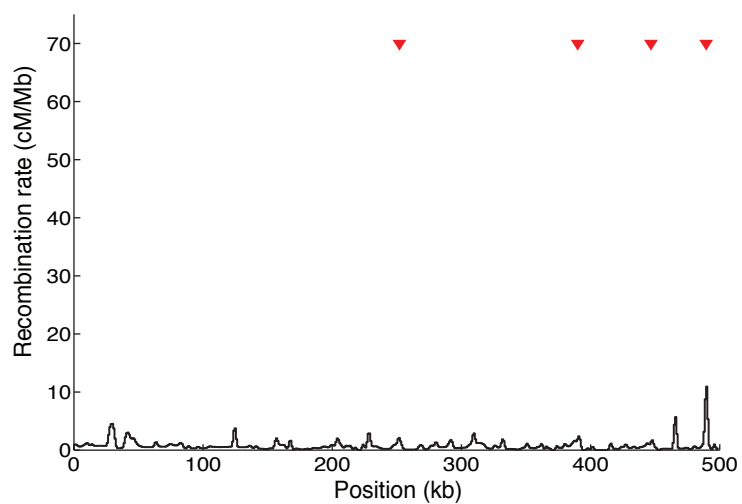

ENr213.18q12.1

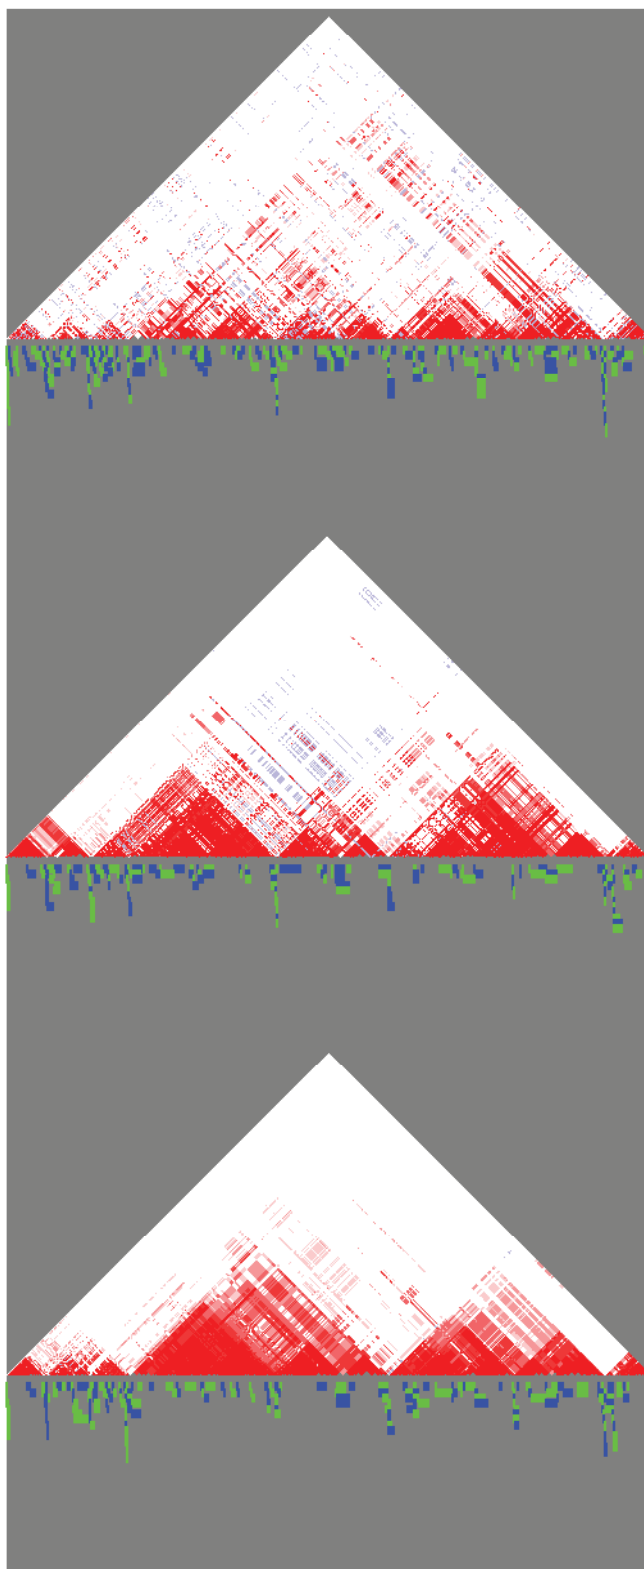

YRI

CEU

CHB+JPT

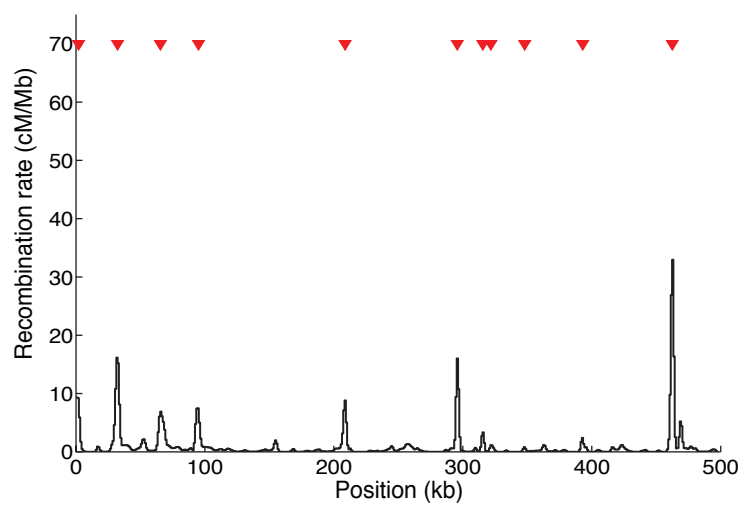

Supplement: 41586_2005_BFnature04226_MOESM8_ESM.pdf [file 41586_2005_BFnature04226_MOESM8_ESM.pdf]
