# Supplementary material for: A haplotype map of the human genome
Source: Springer Nature journal article supplement (doi:10.1038/nature04226), 2005-10-01

# Chromosome 1

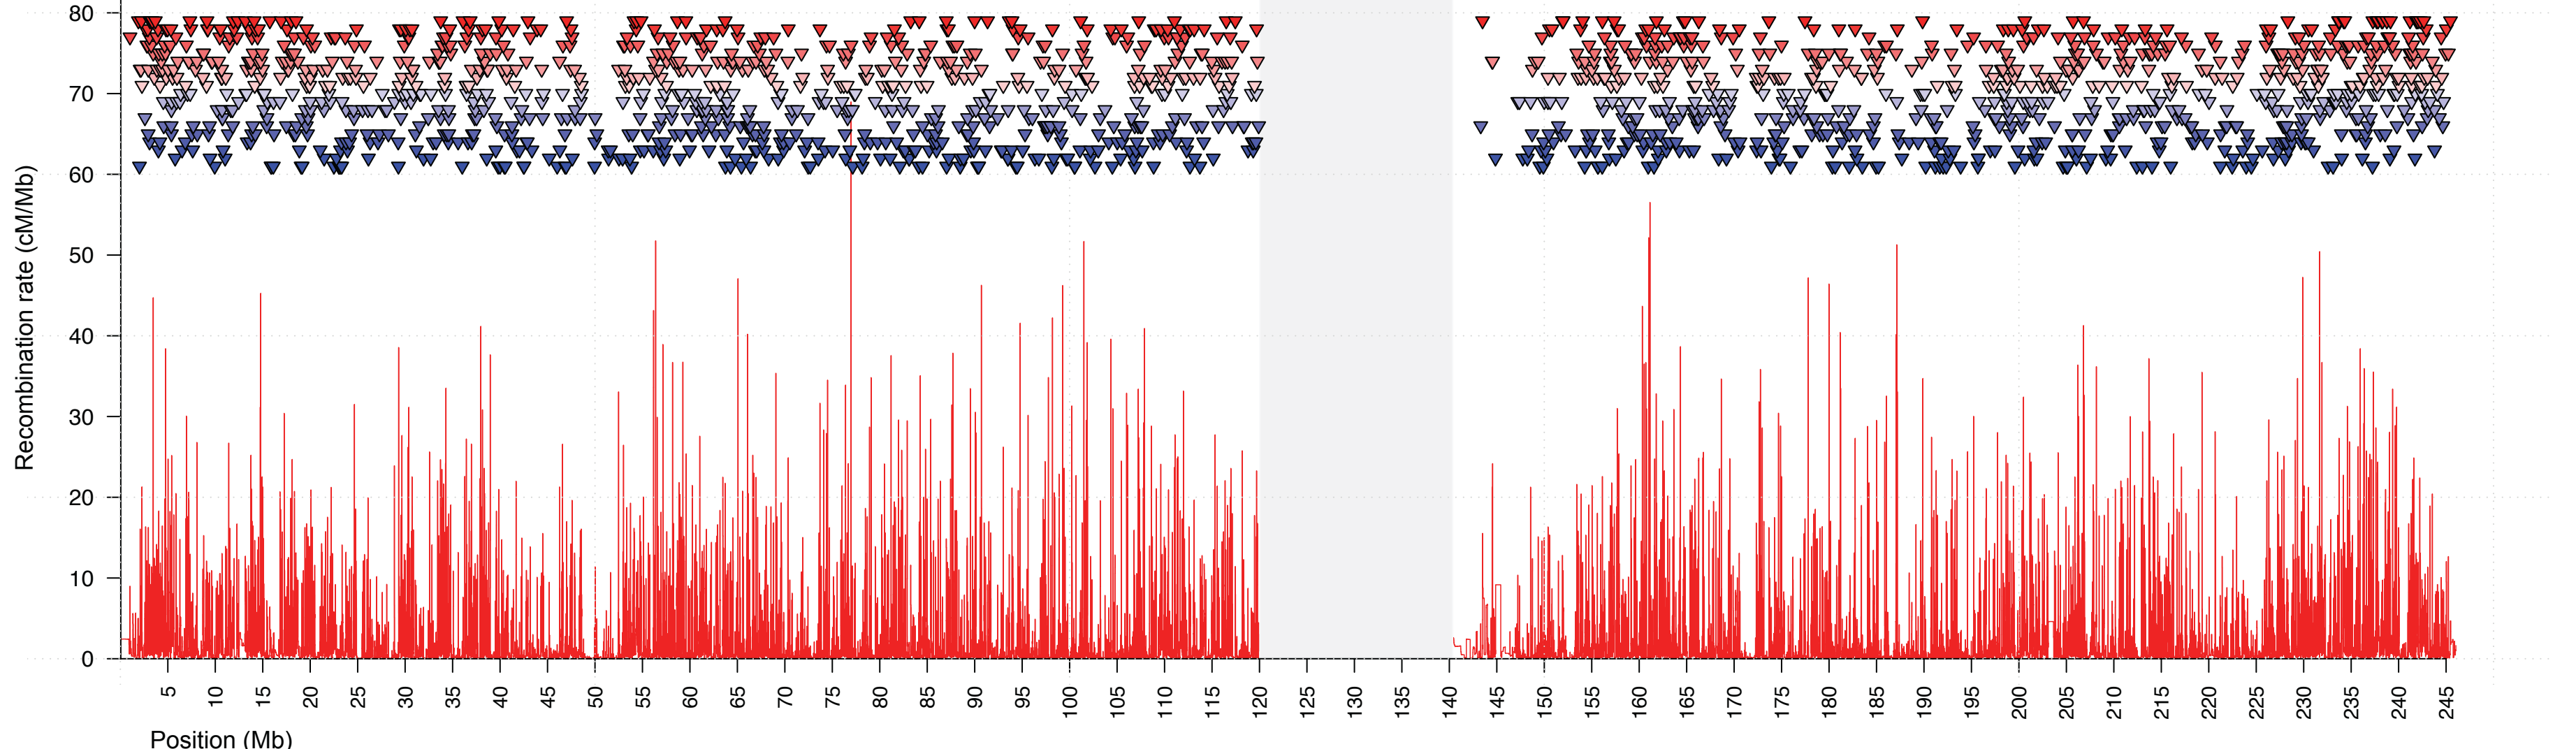

# Chromosome 2

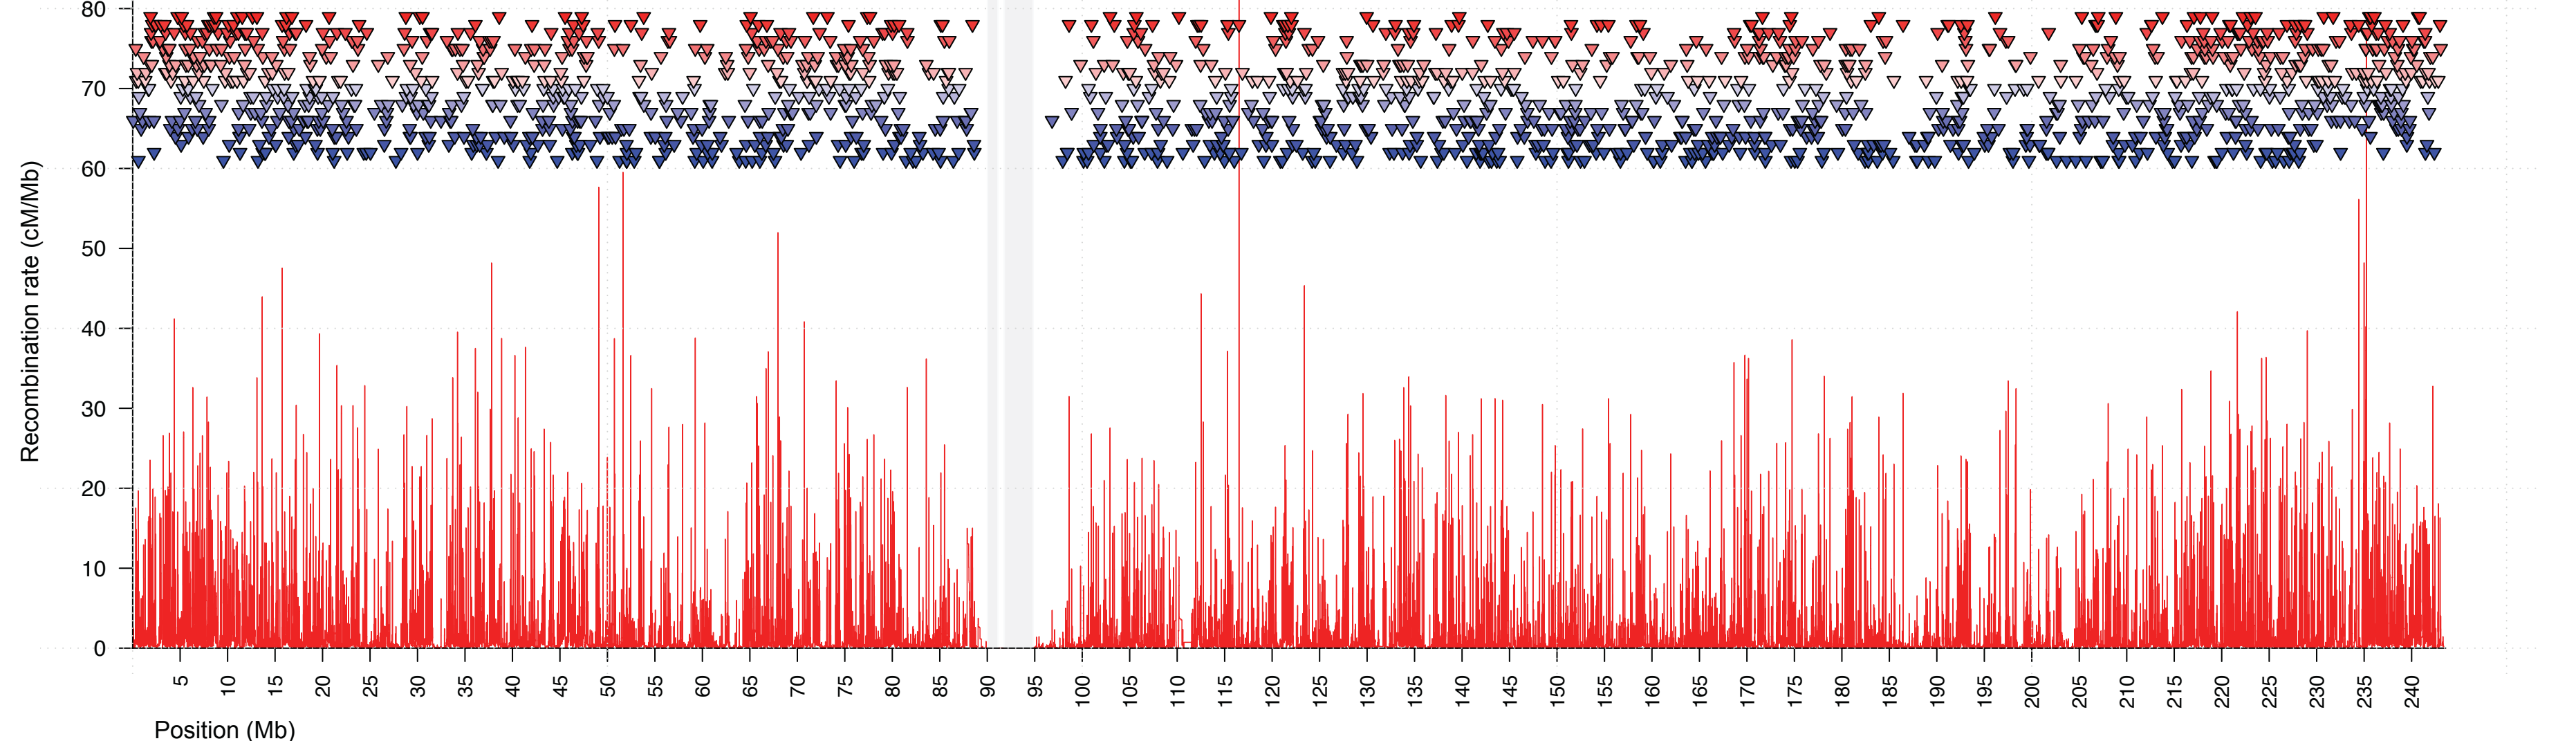

# Chromosome 3

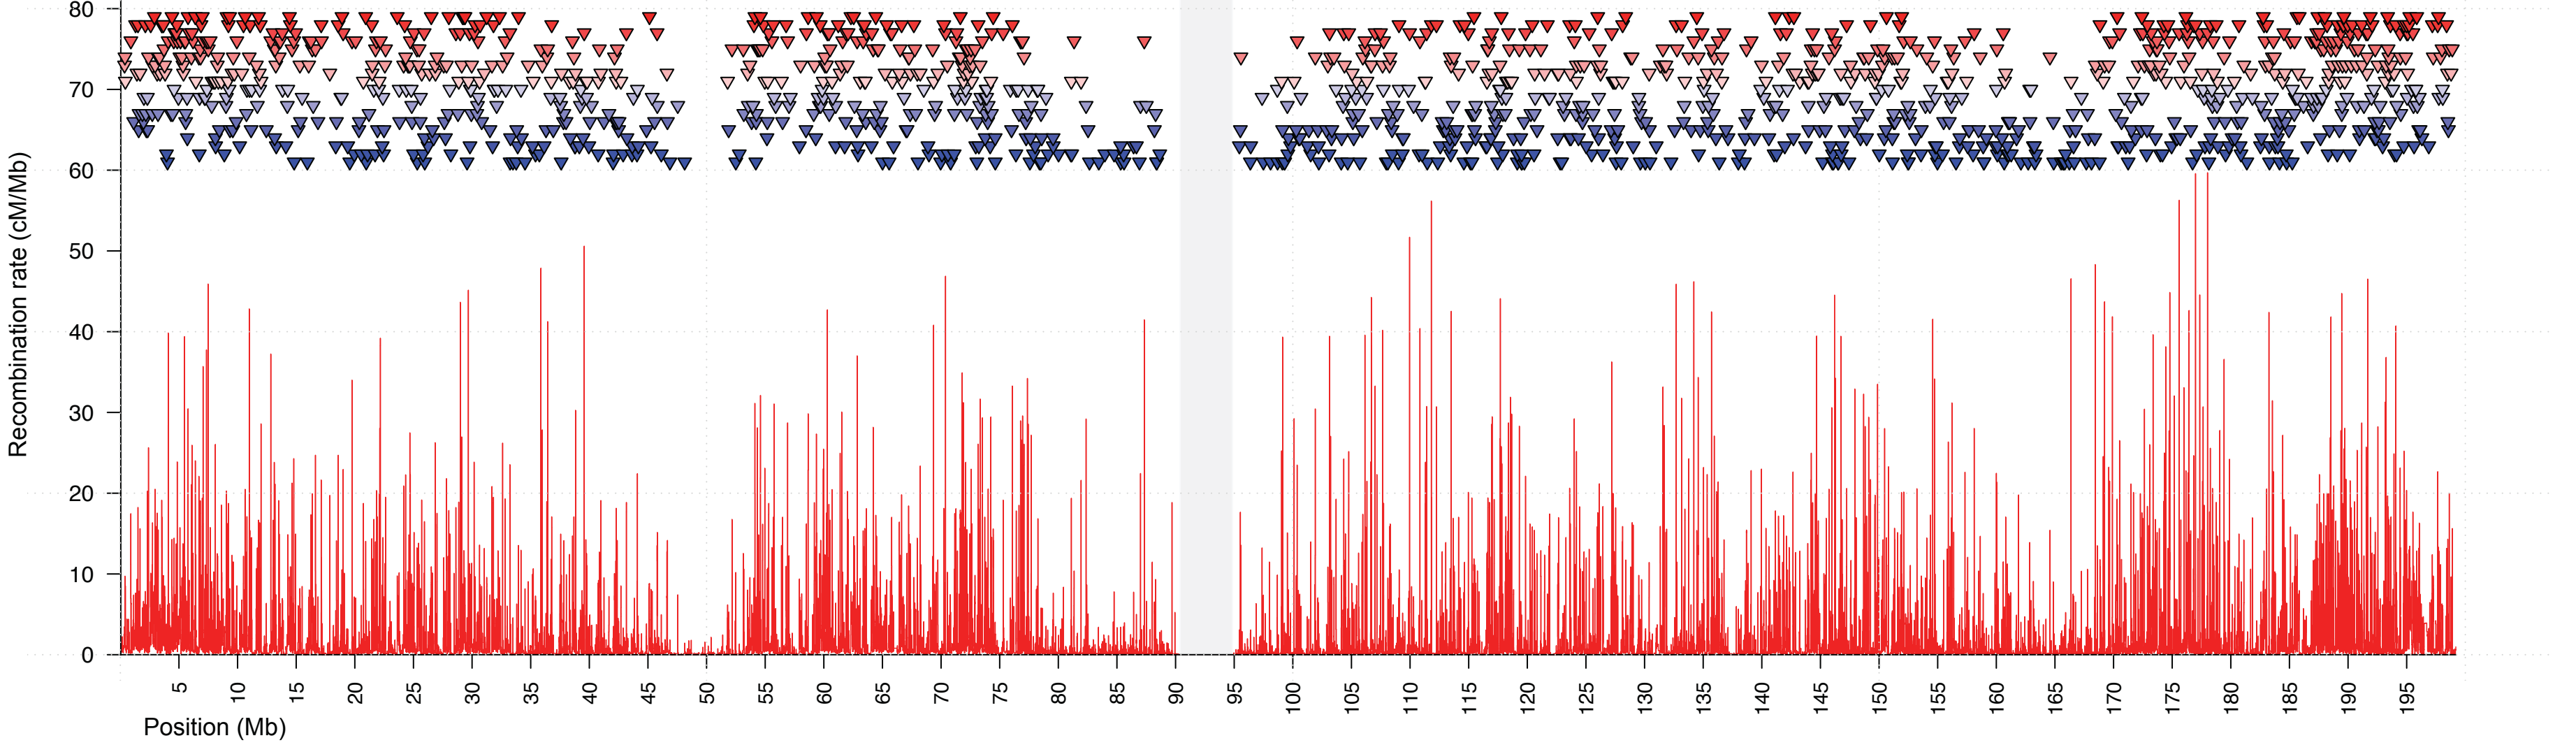

# Chromosome 4

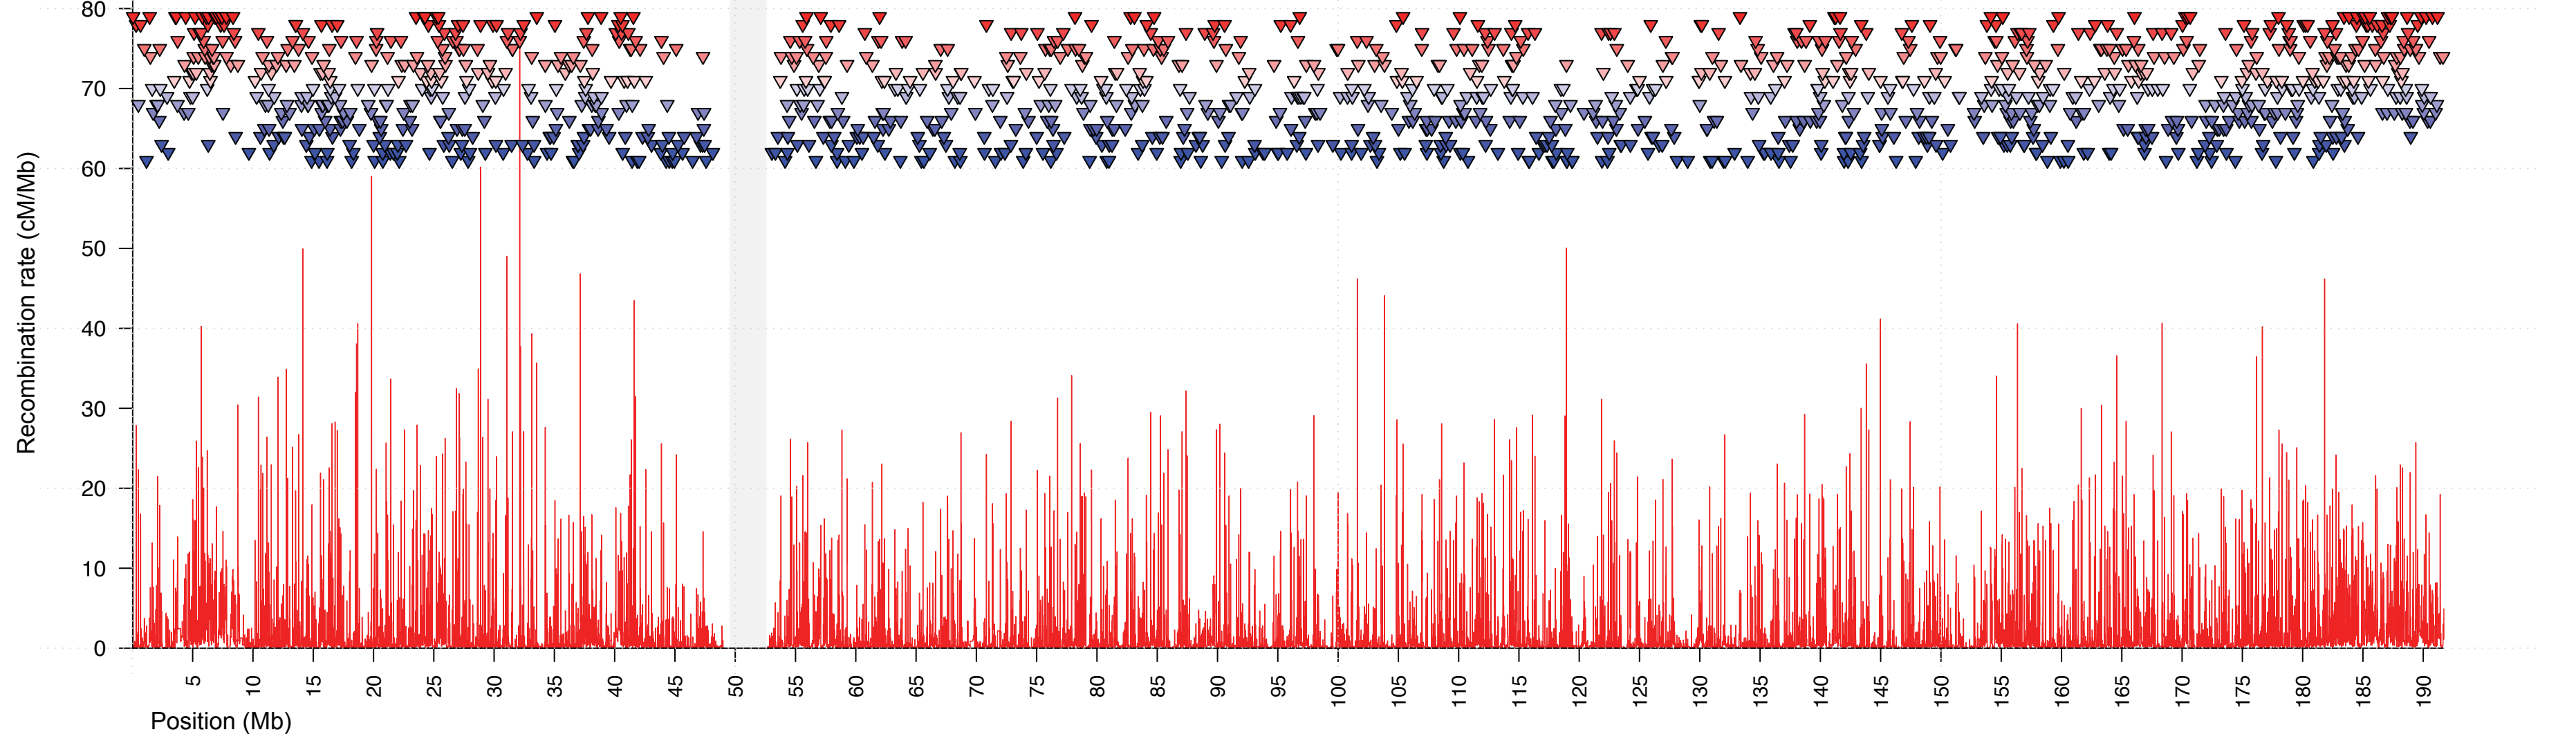

# Chromosome 5

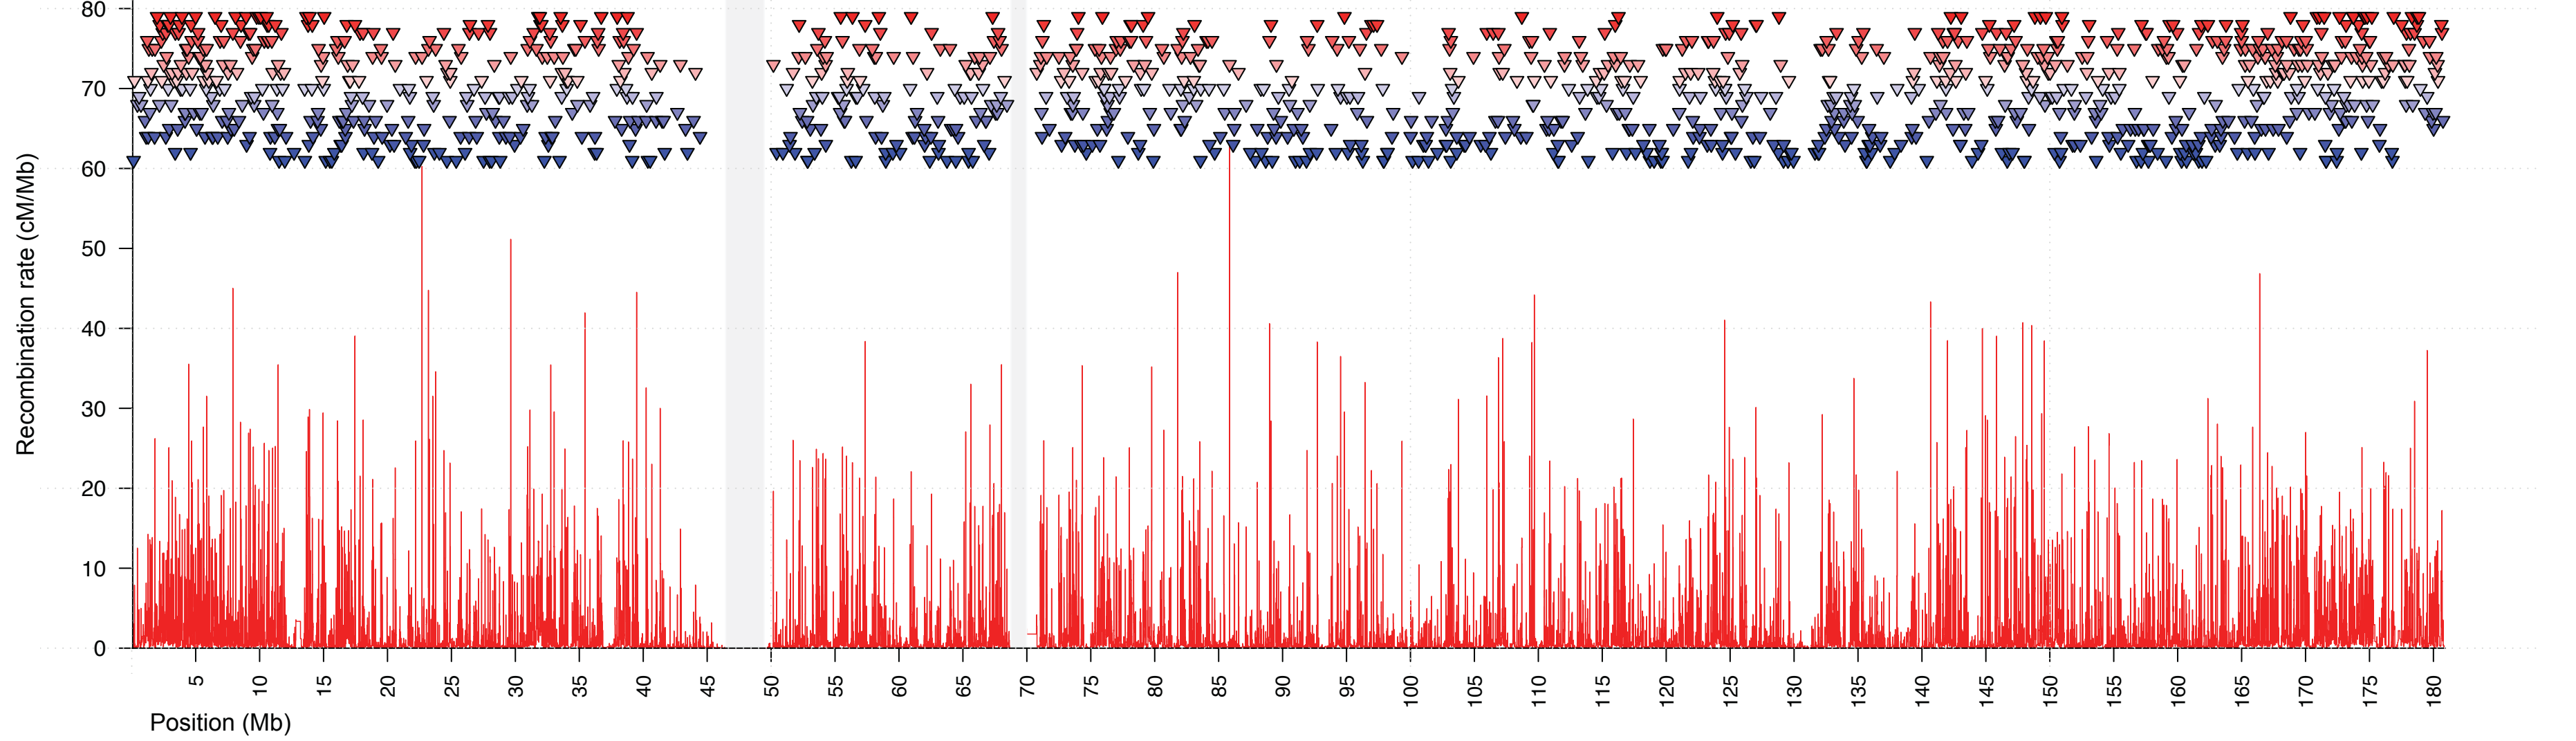

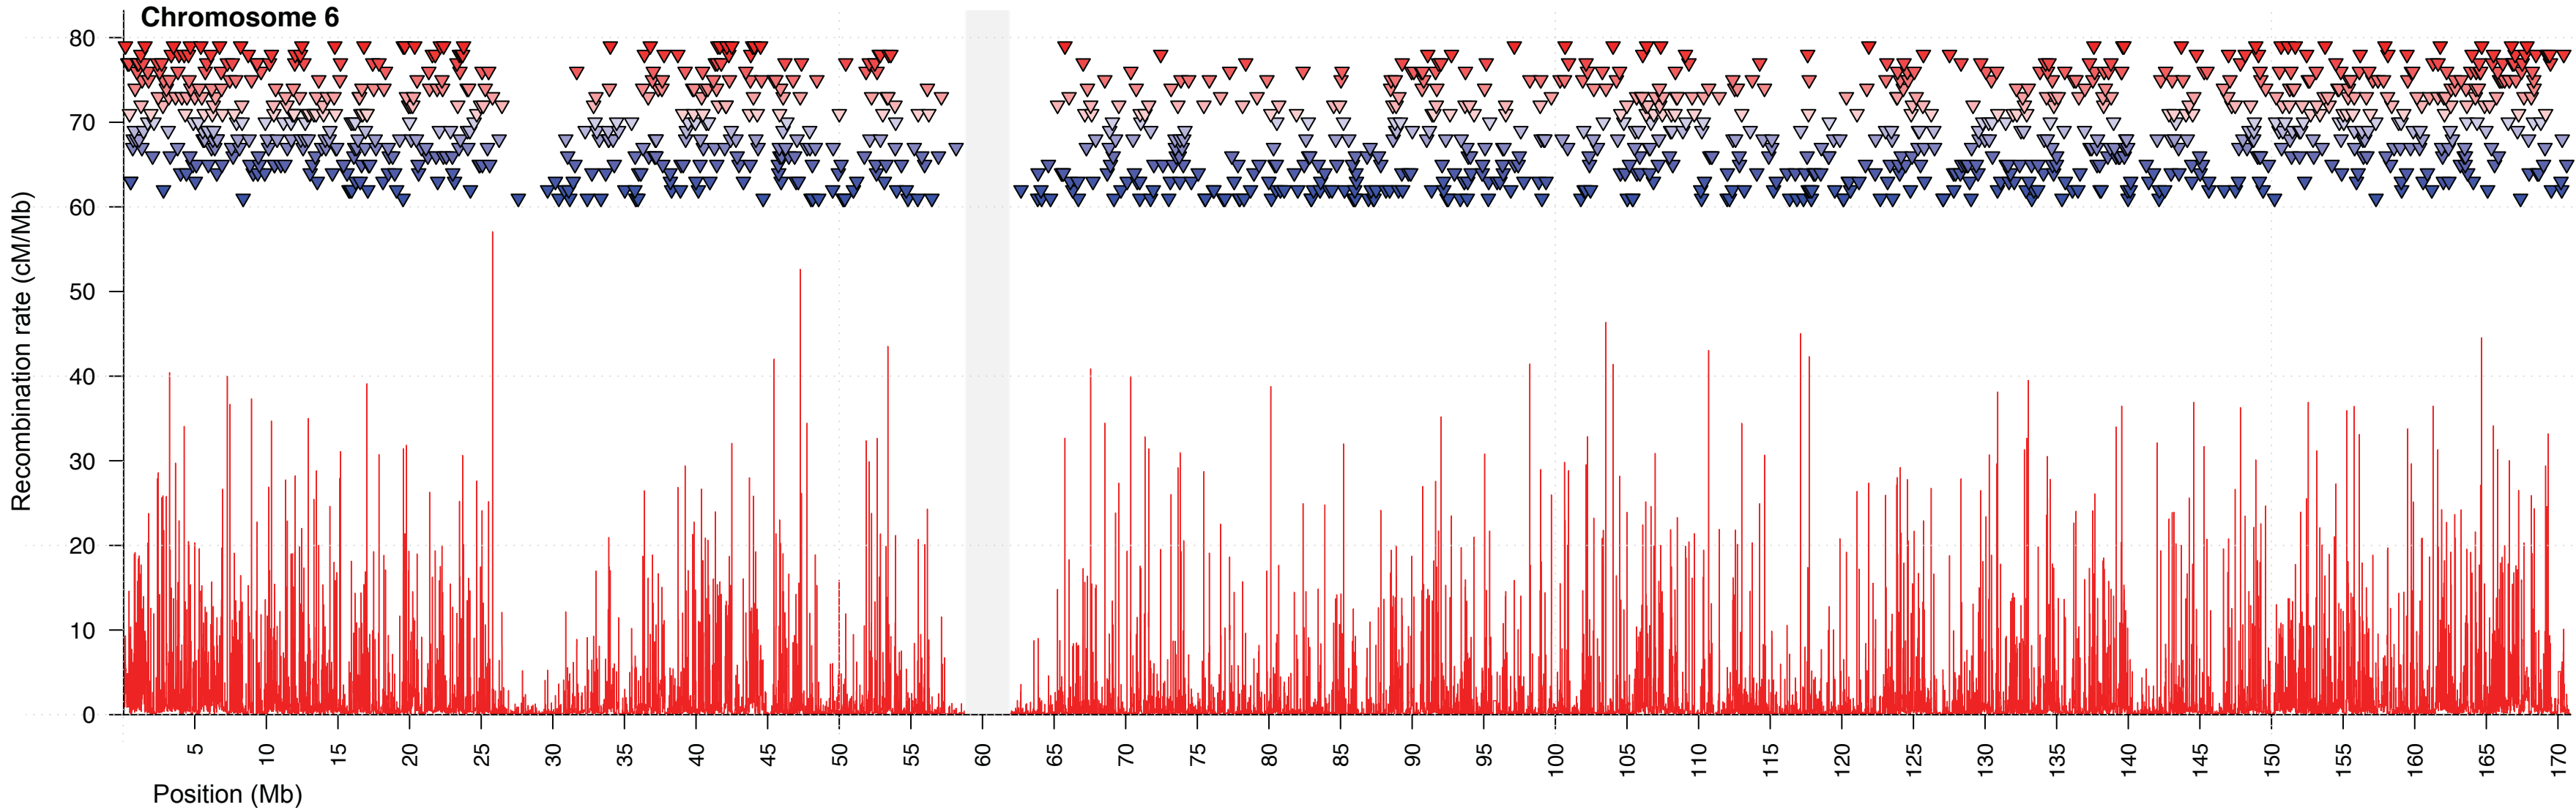

# Chromosome 7

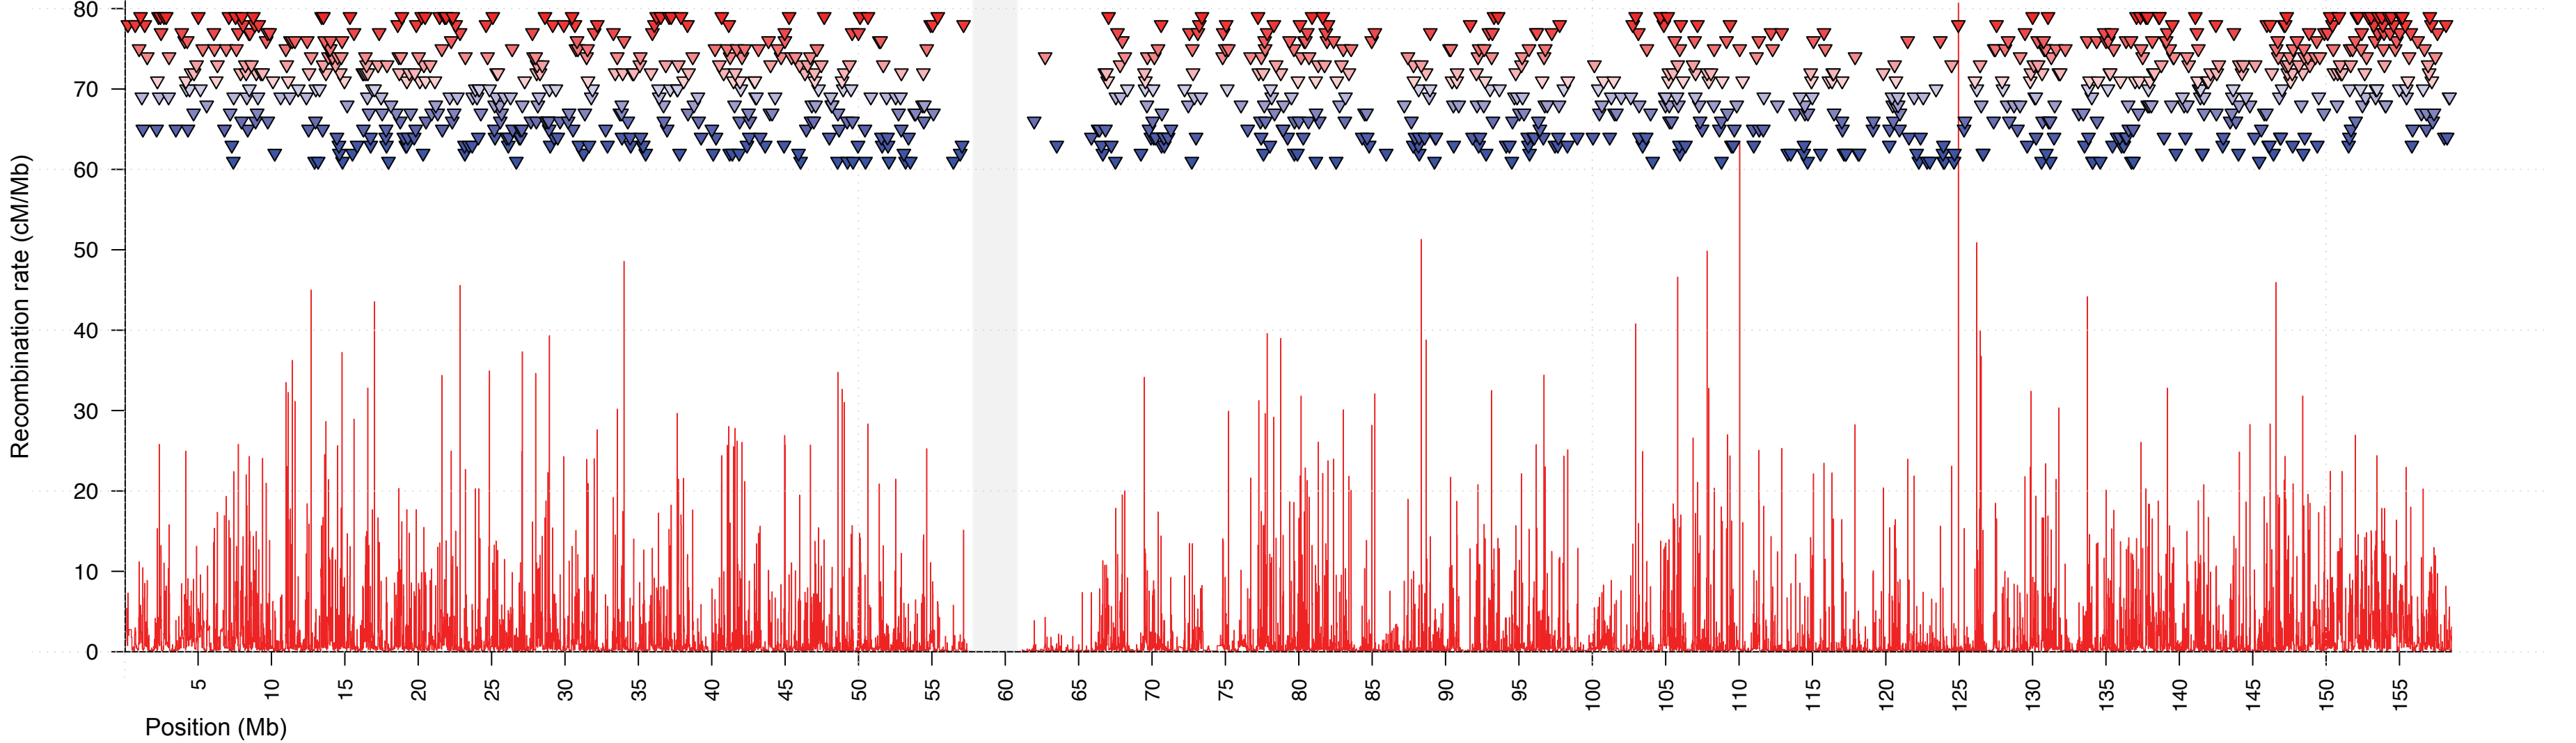

# Chromosome 8

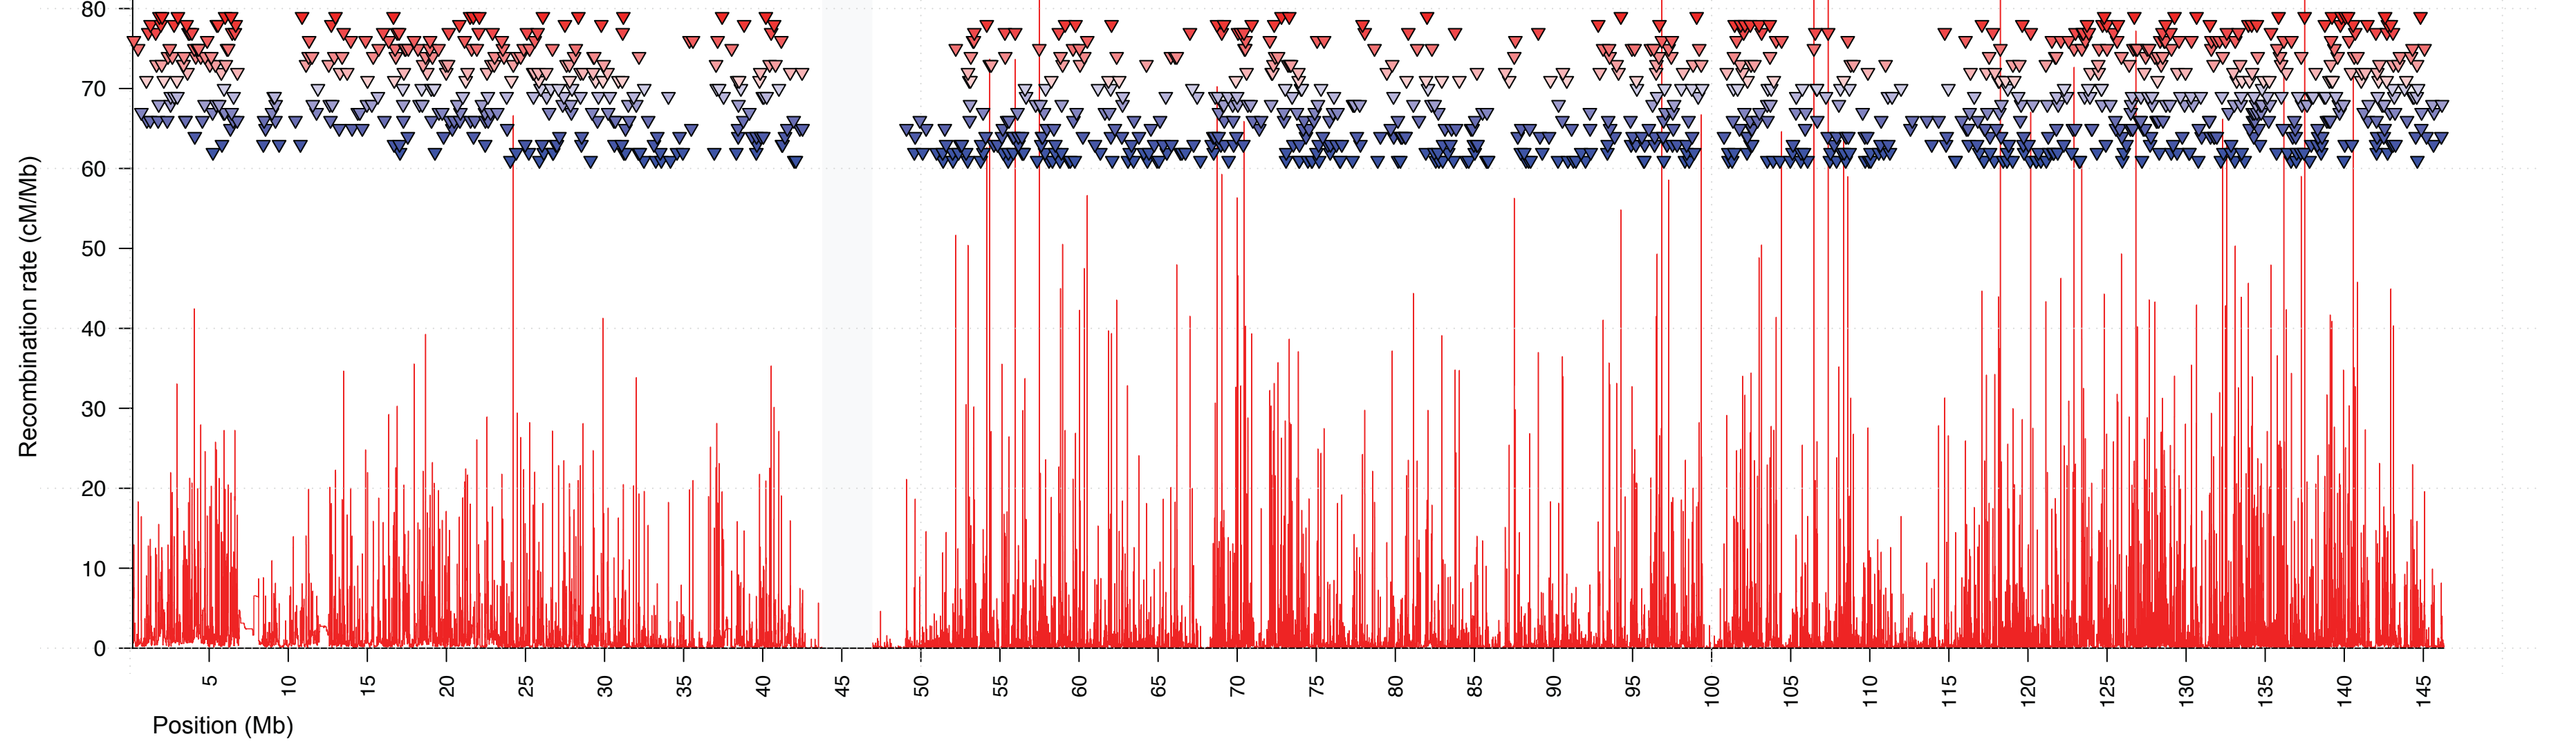



# Chromosome 9

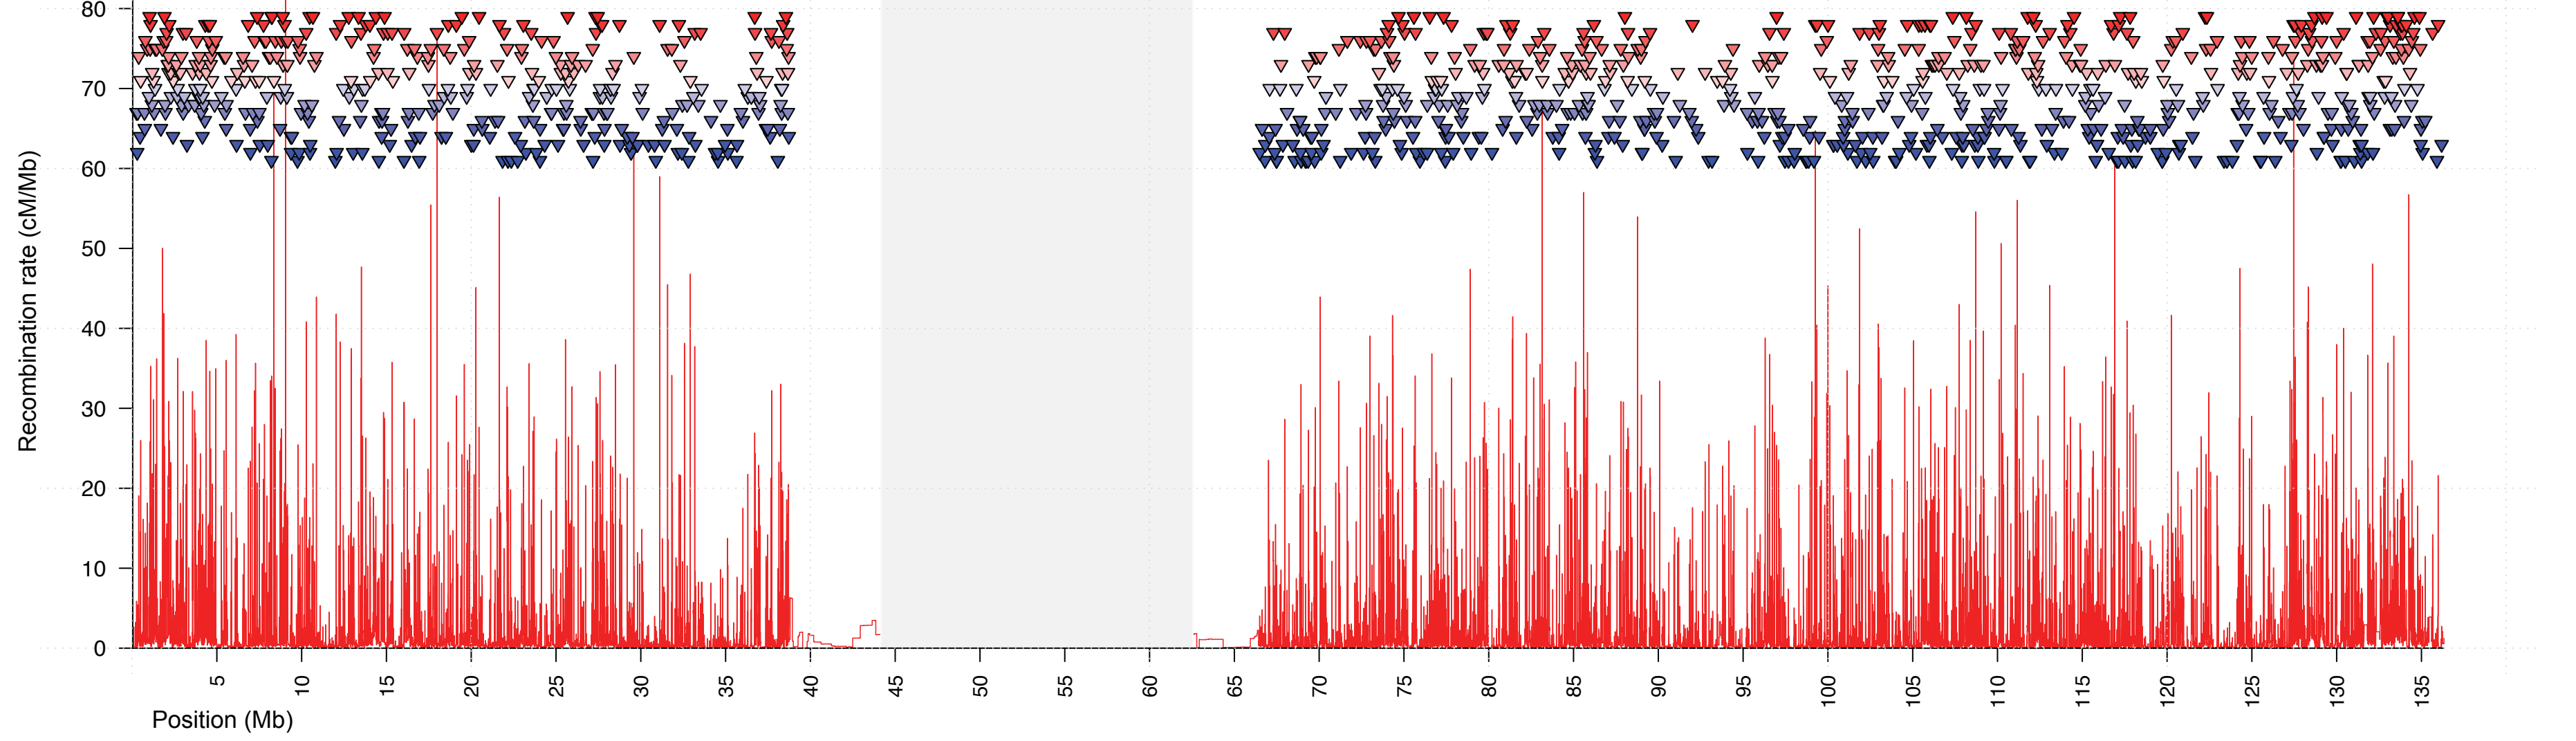

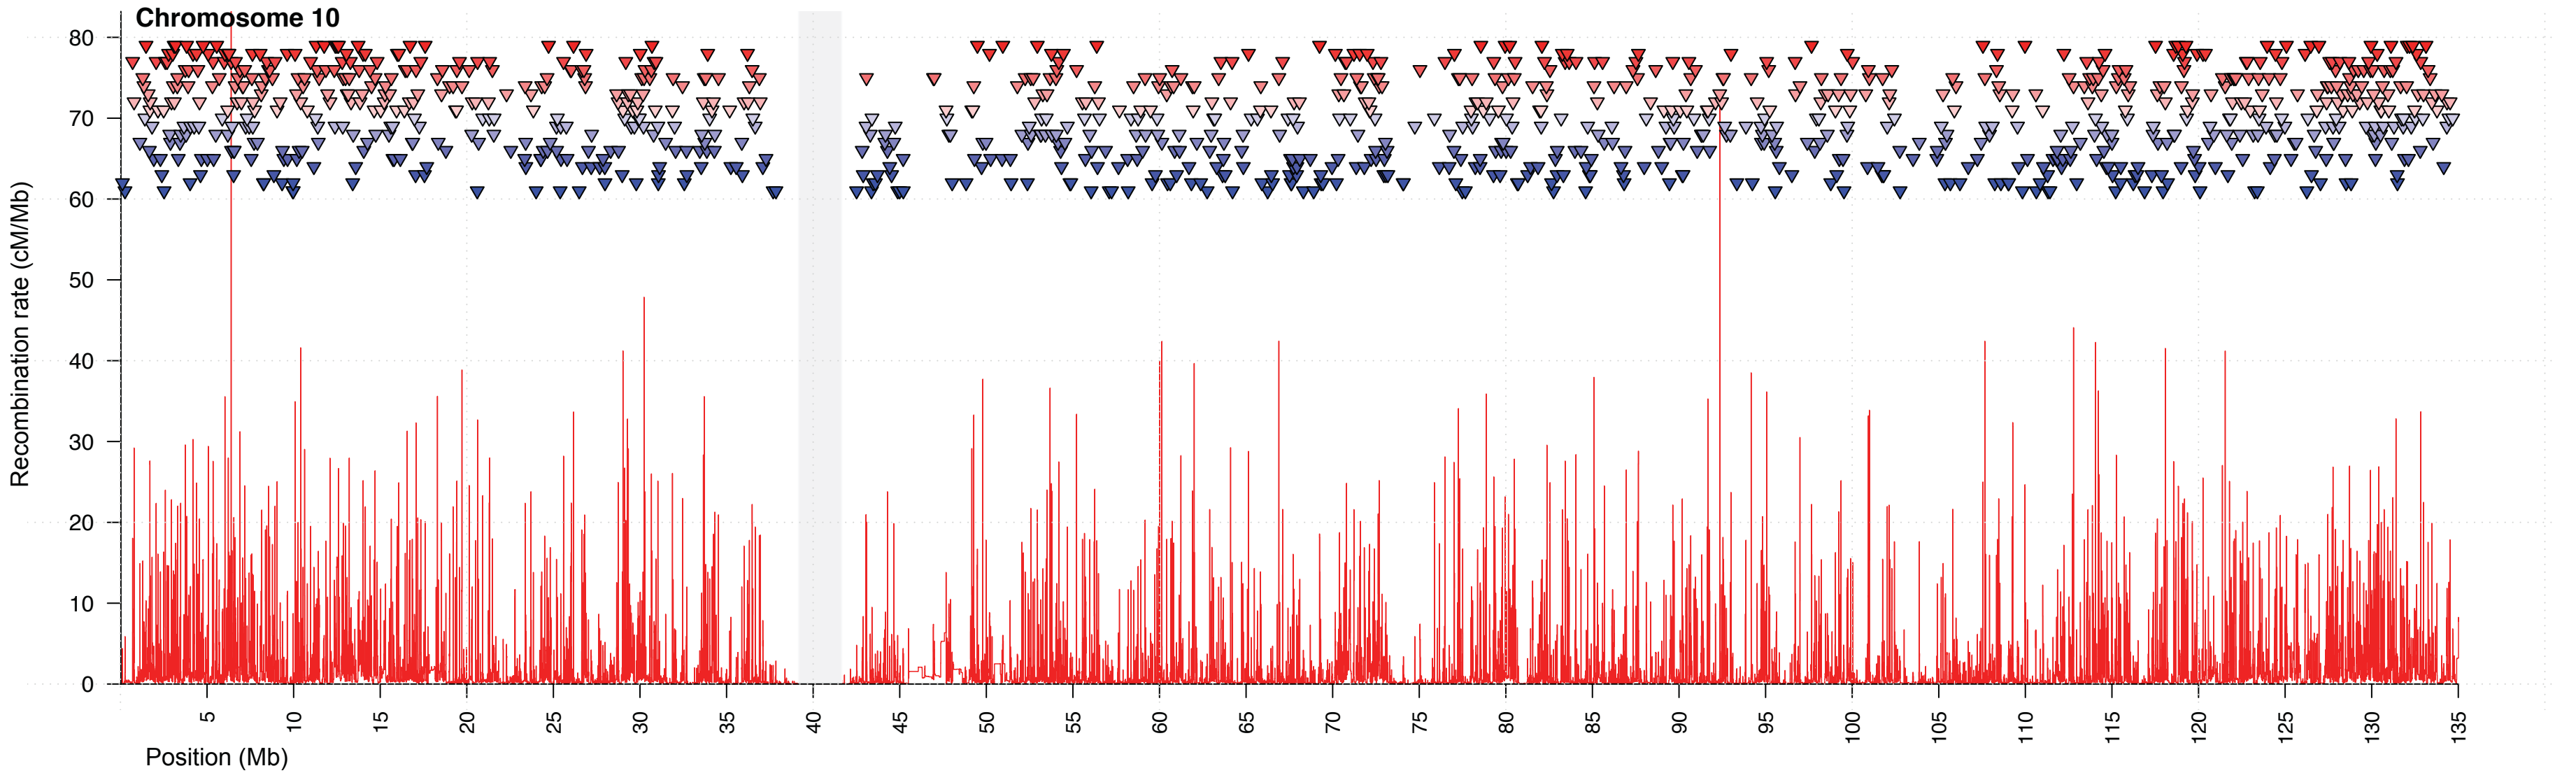

# Chromosome 11

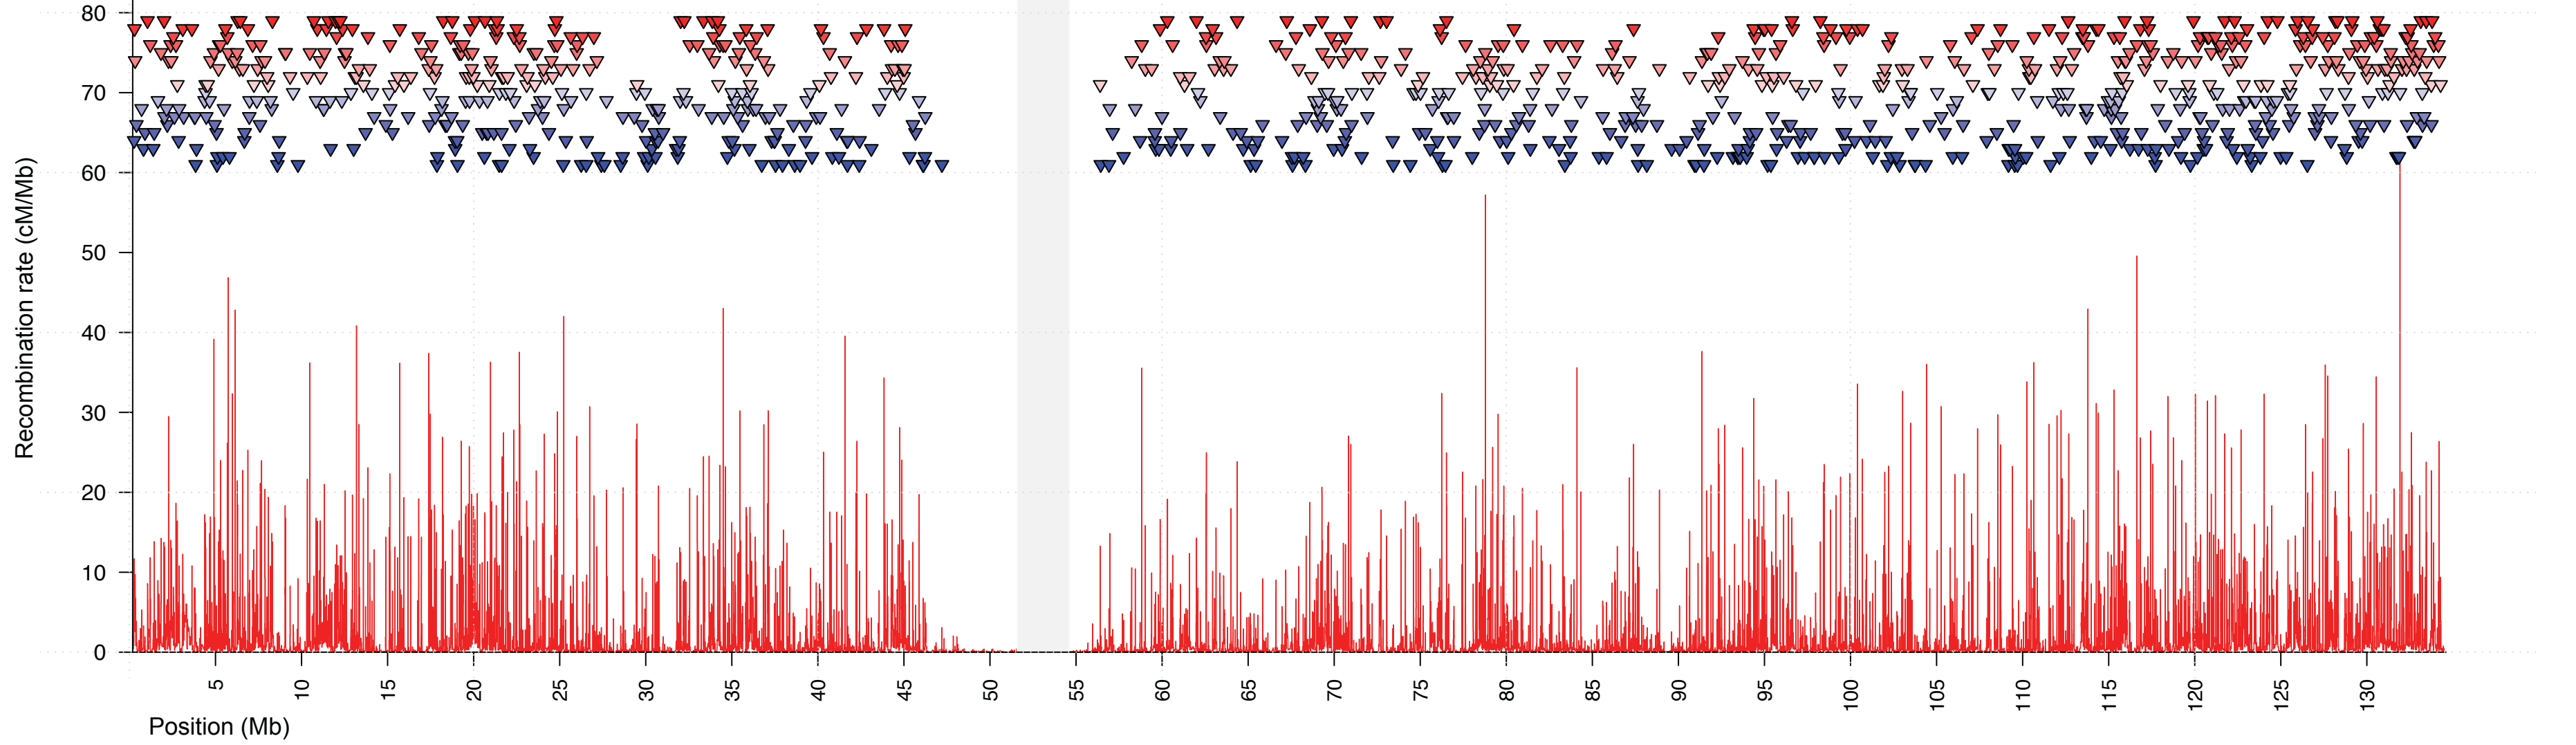

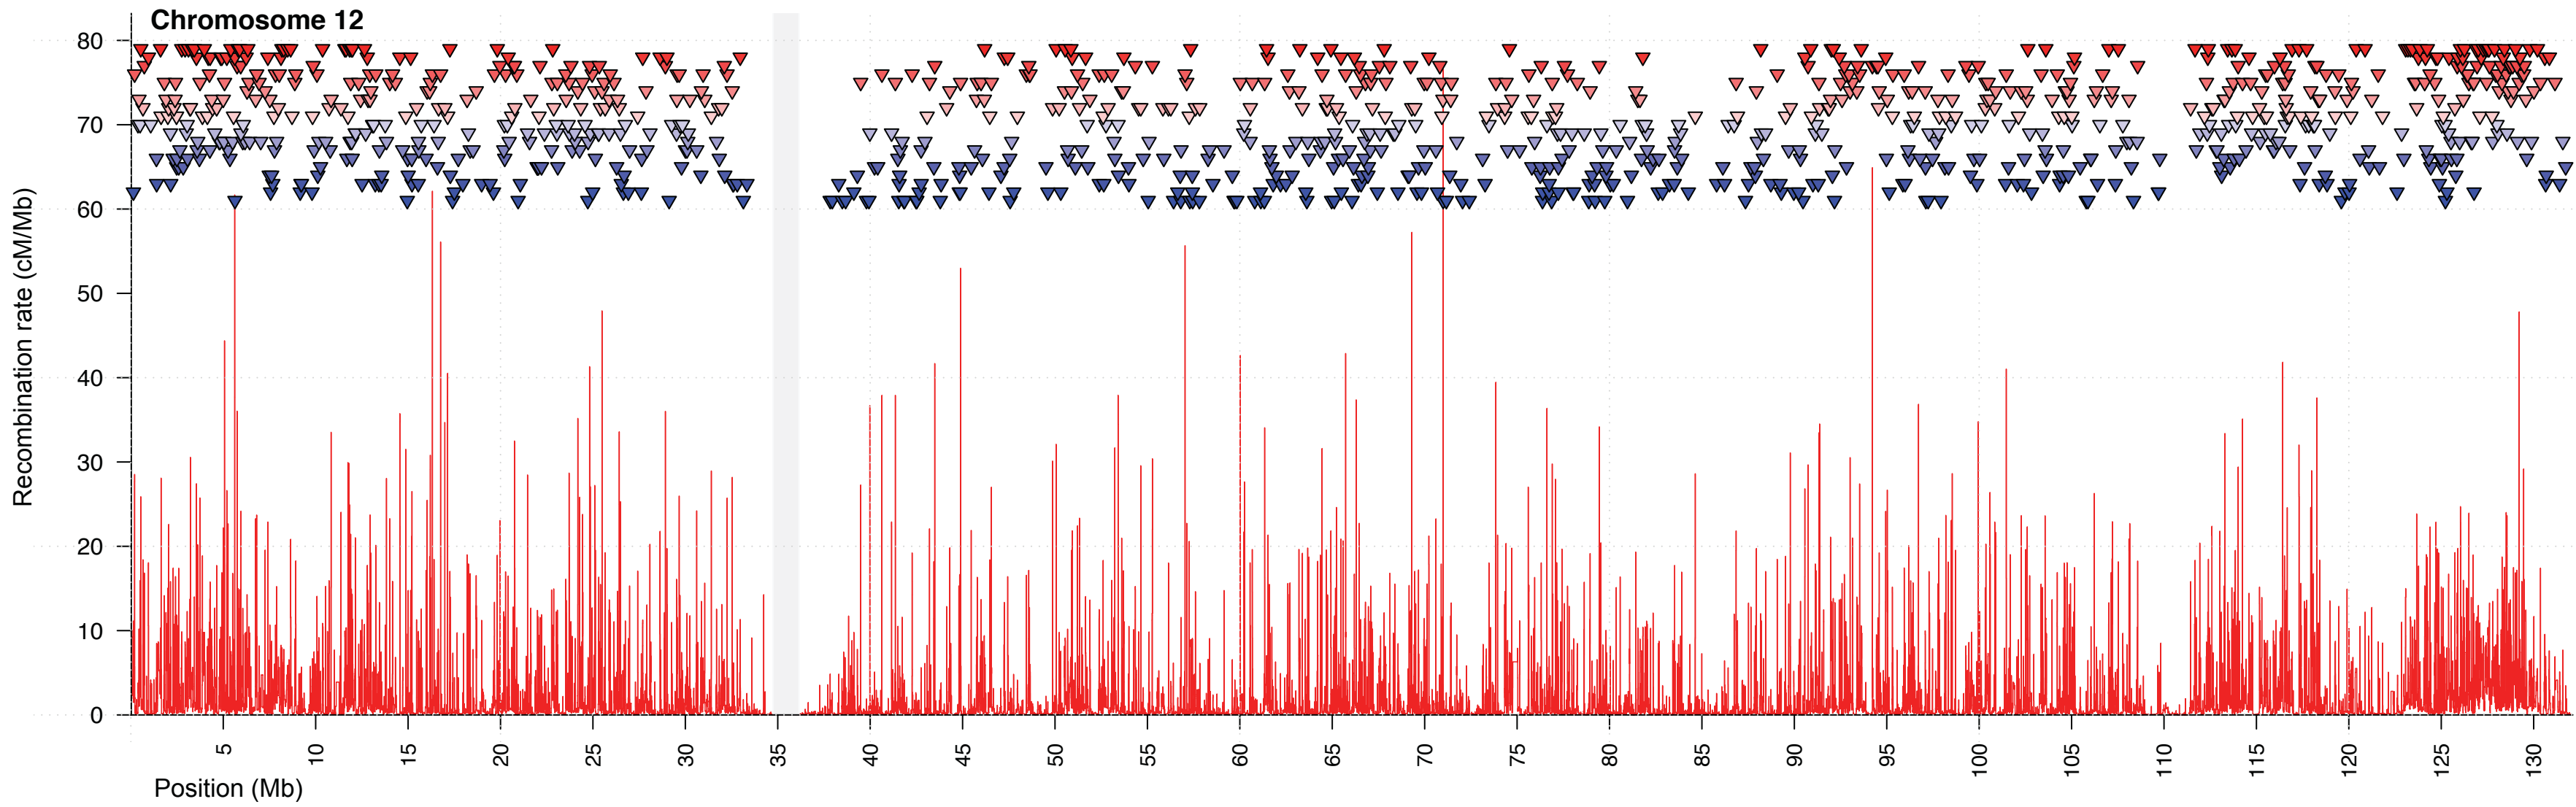

# Chromosome 13

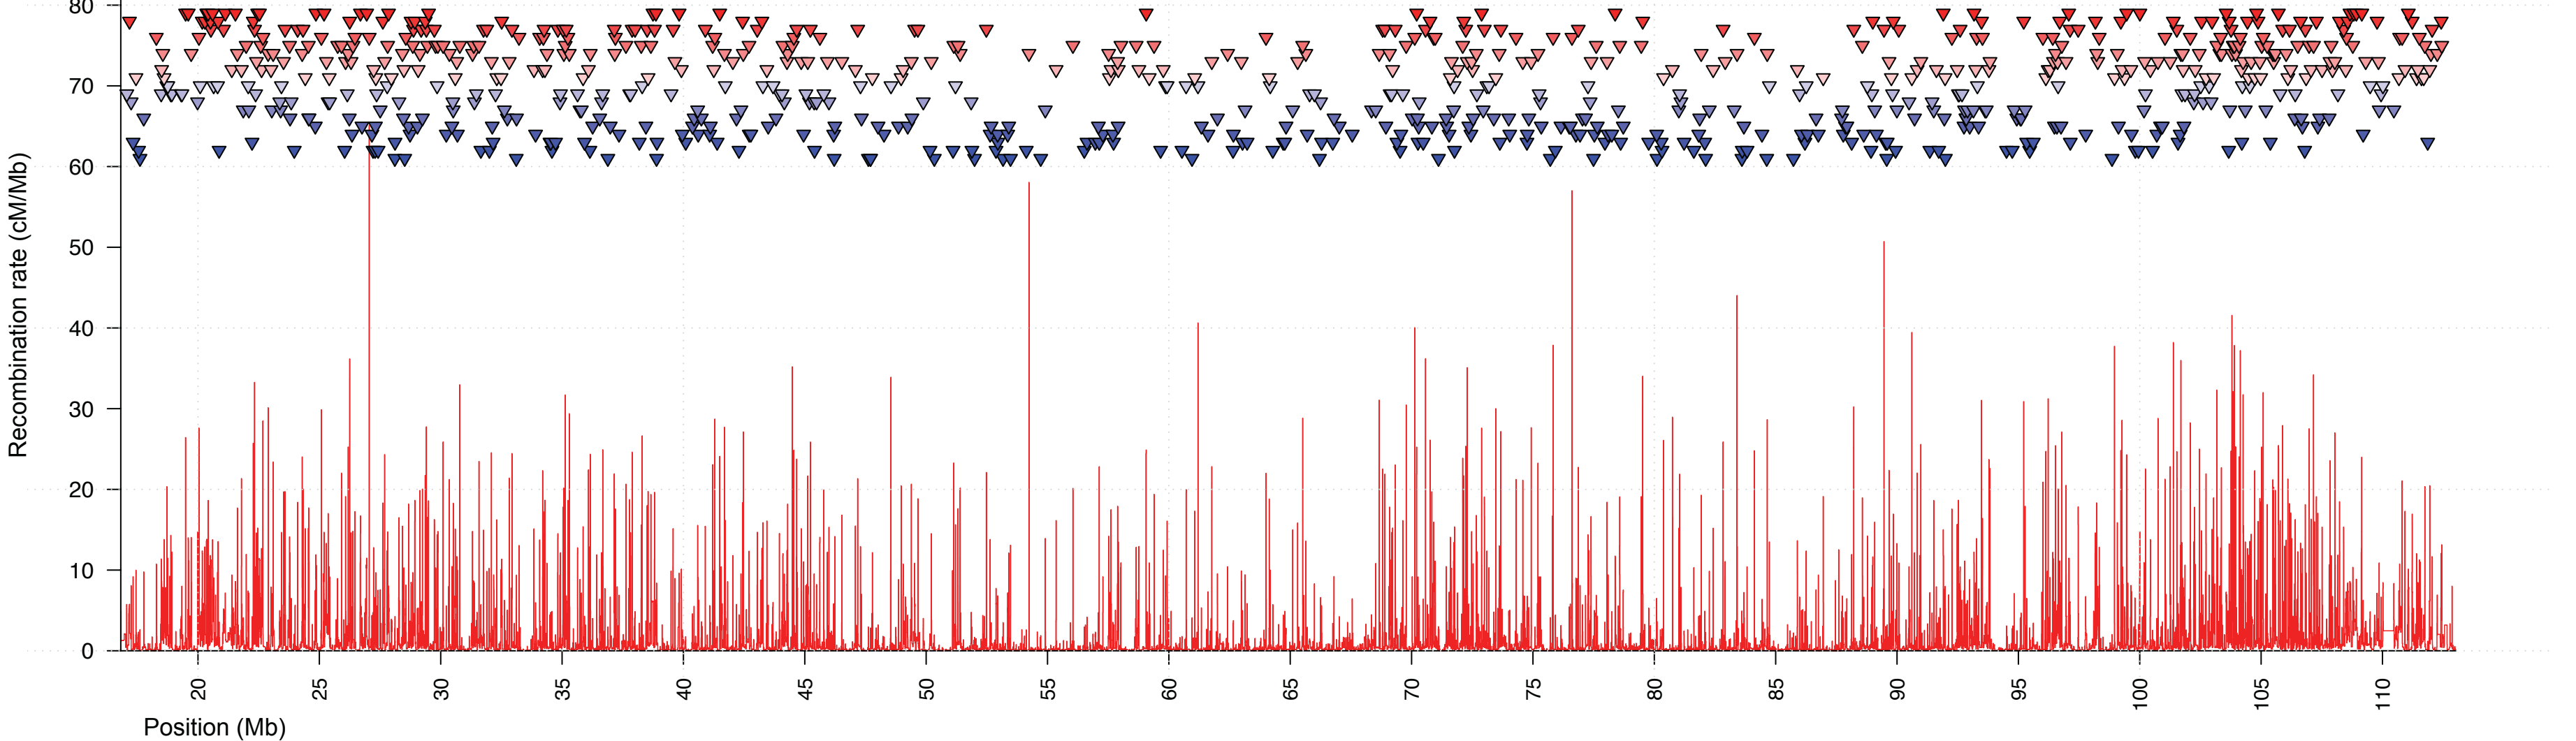

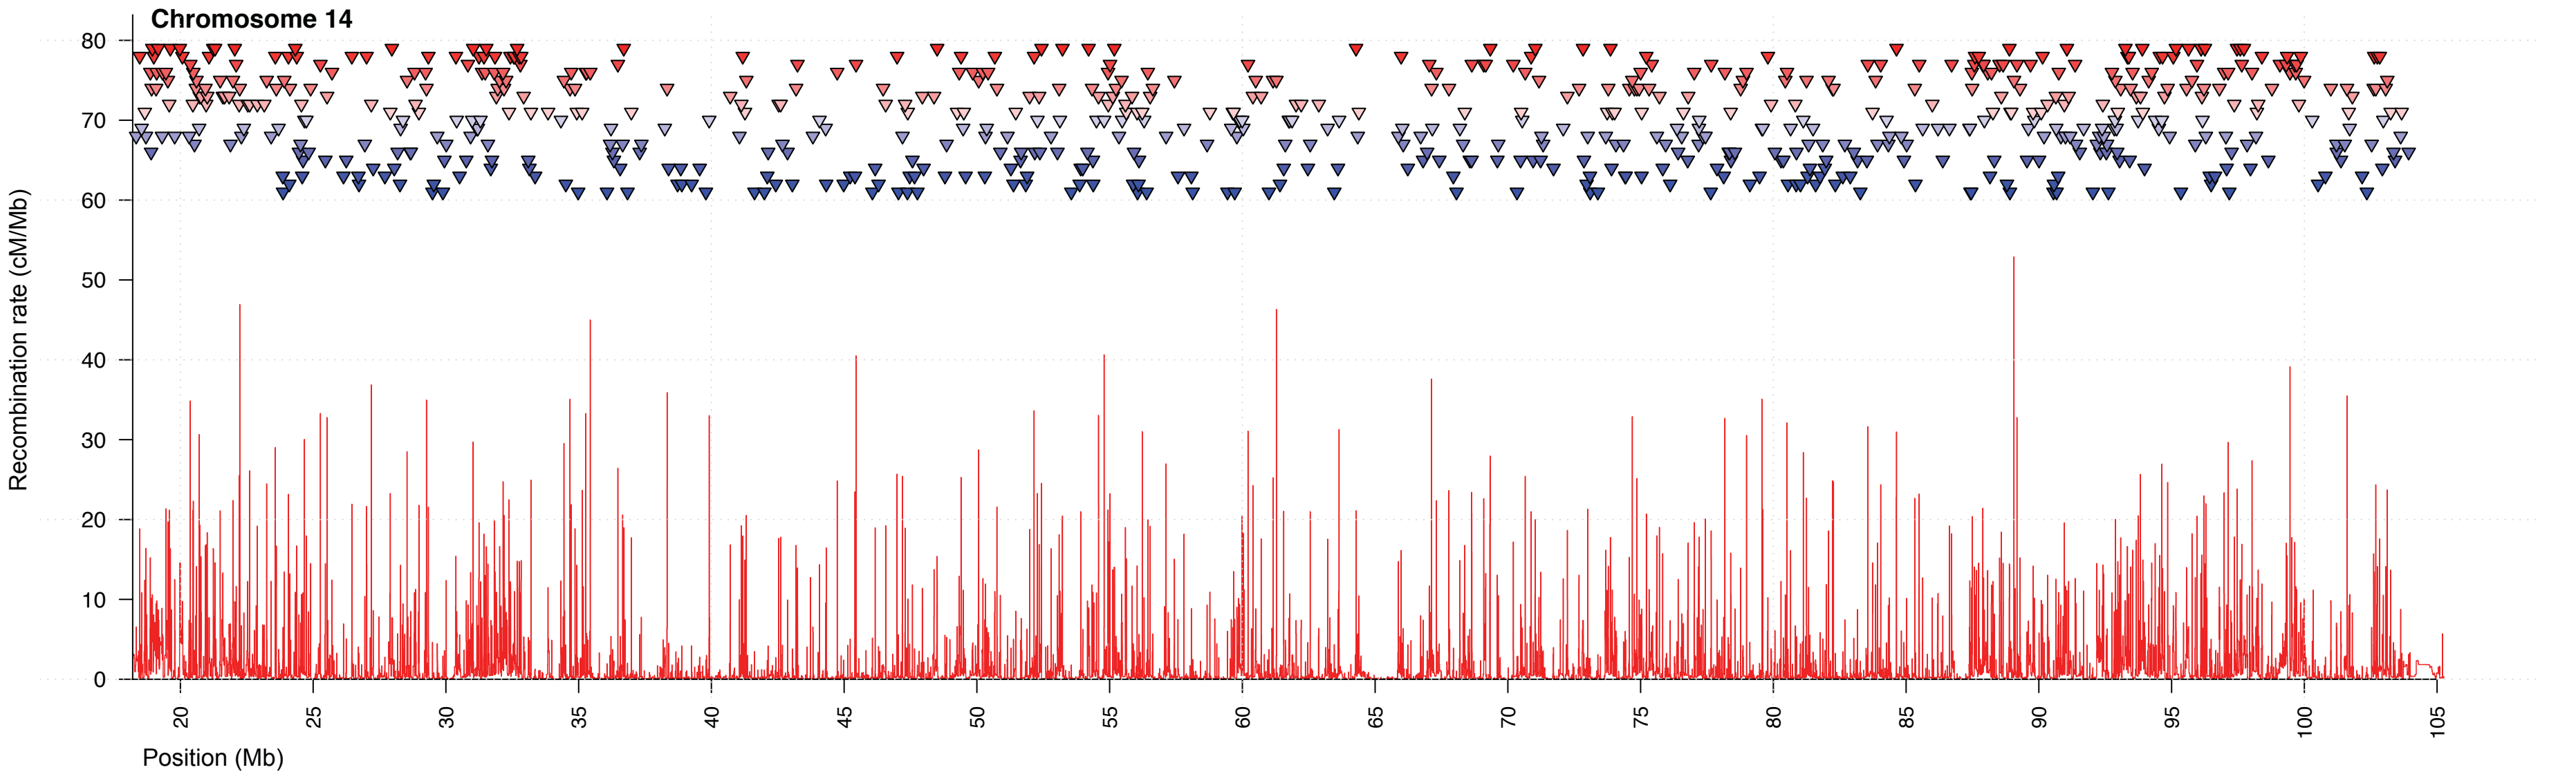

# Chromosome 15

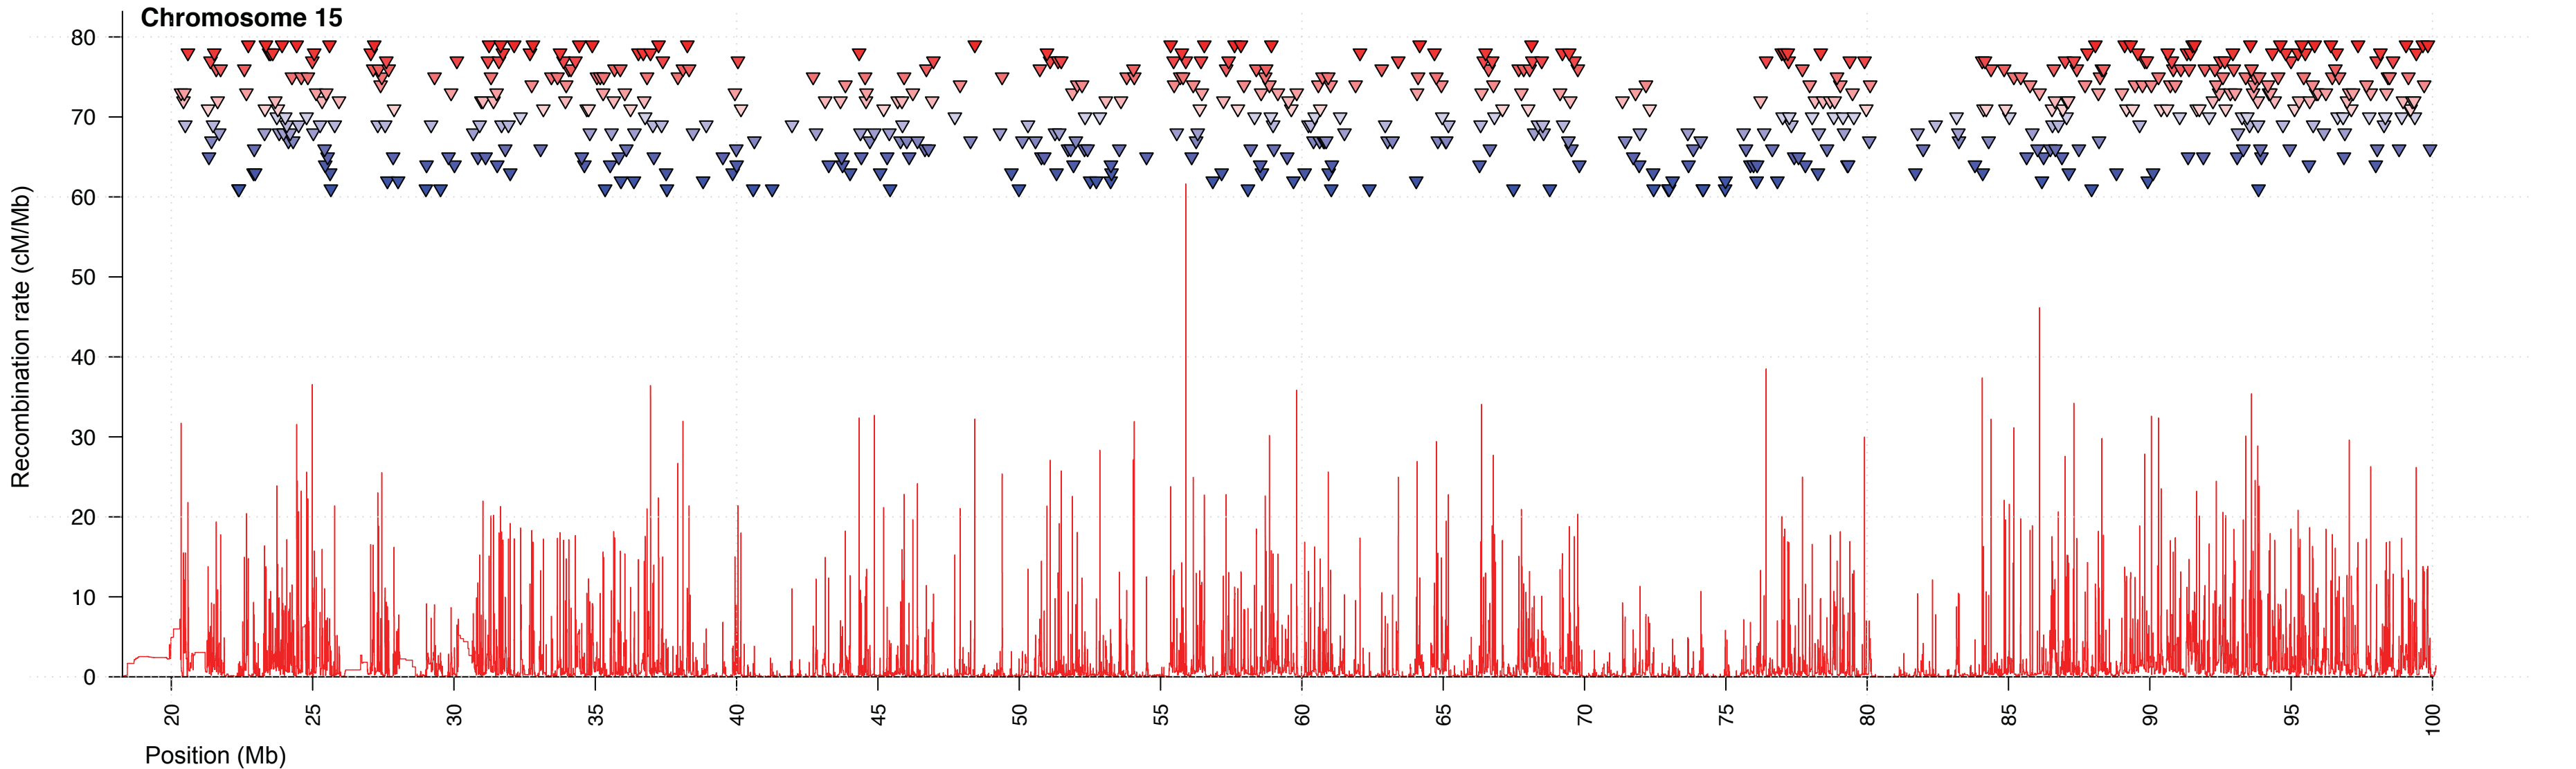

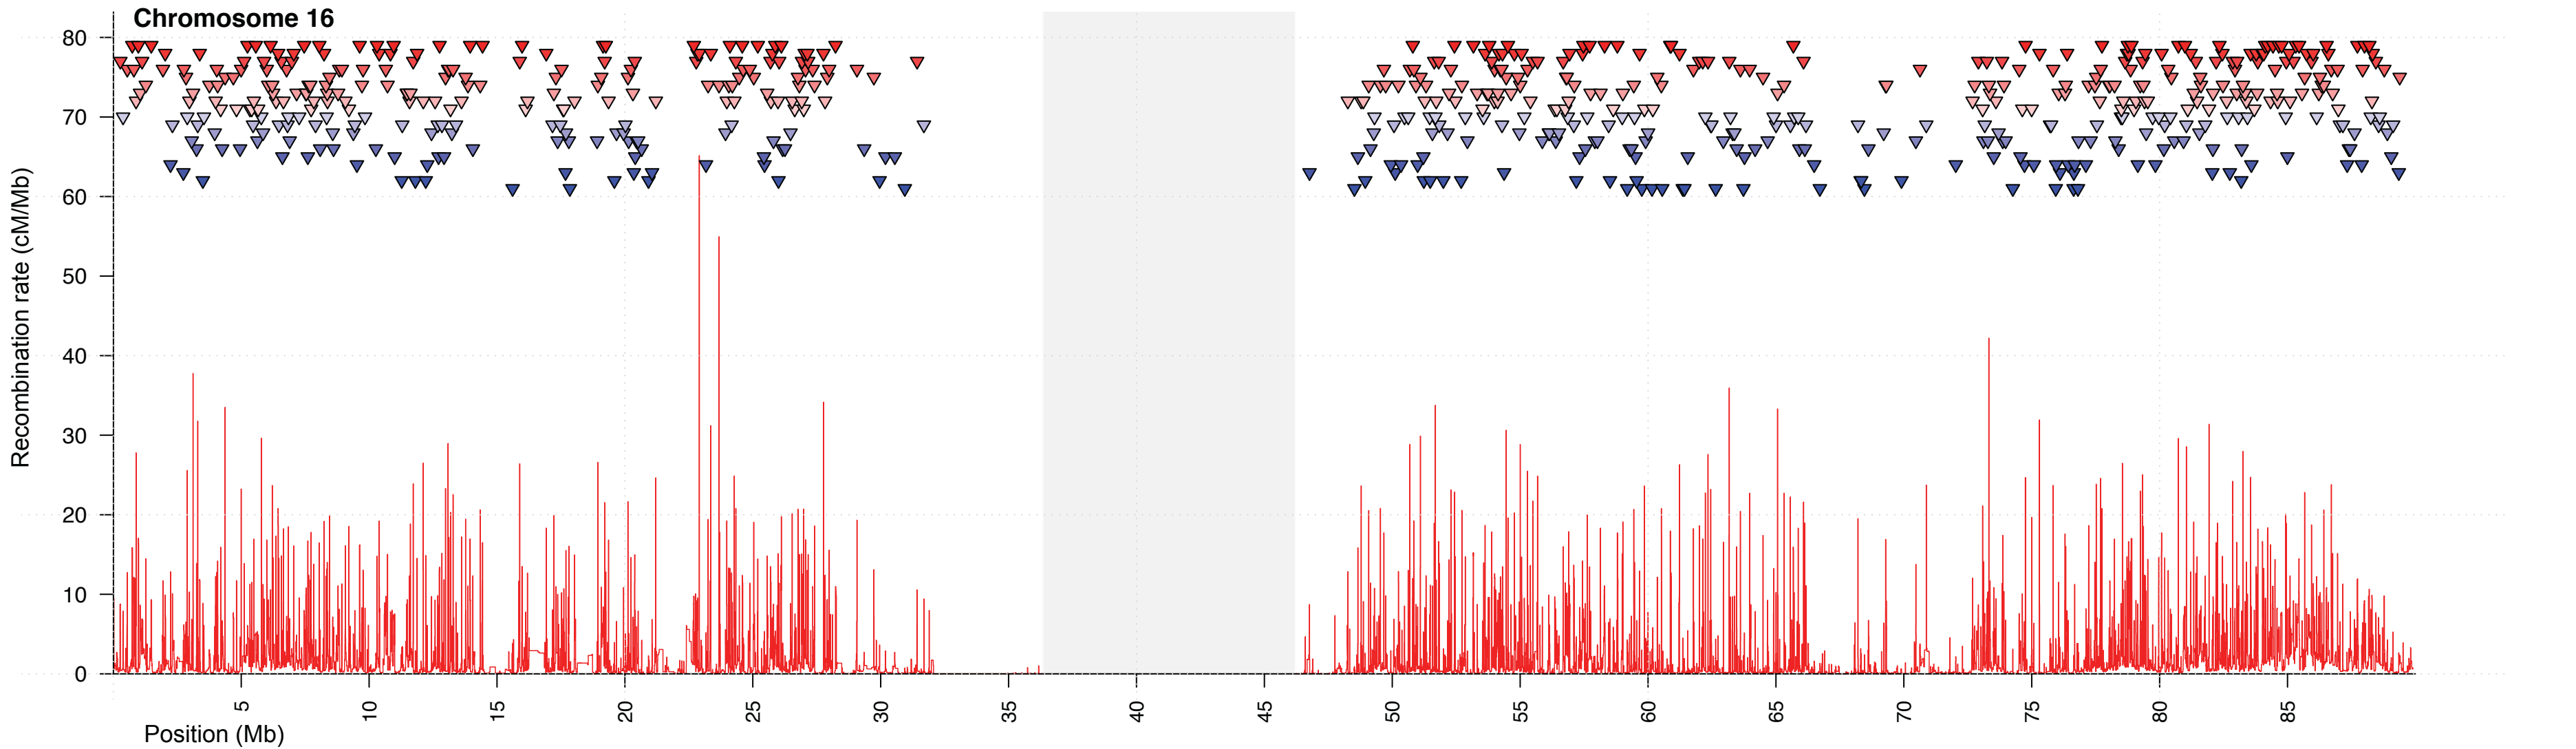



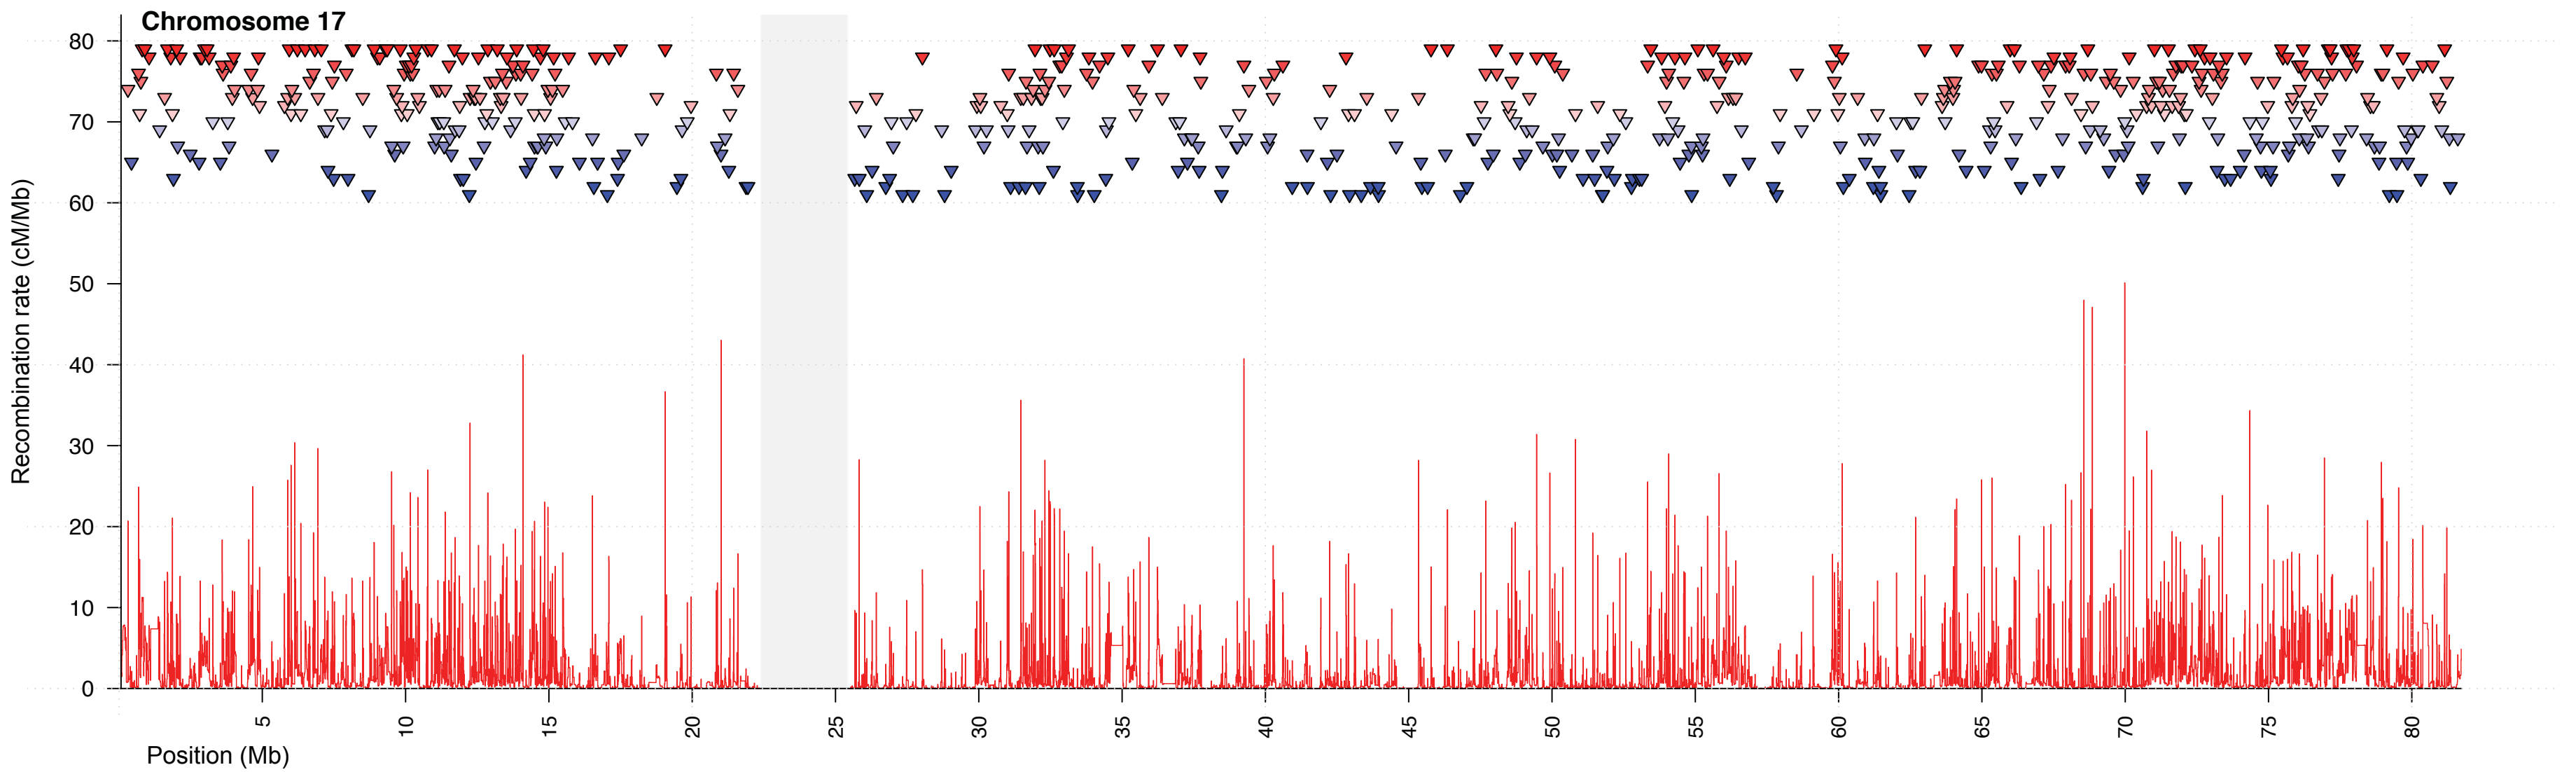

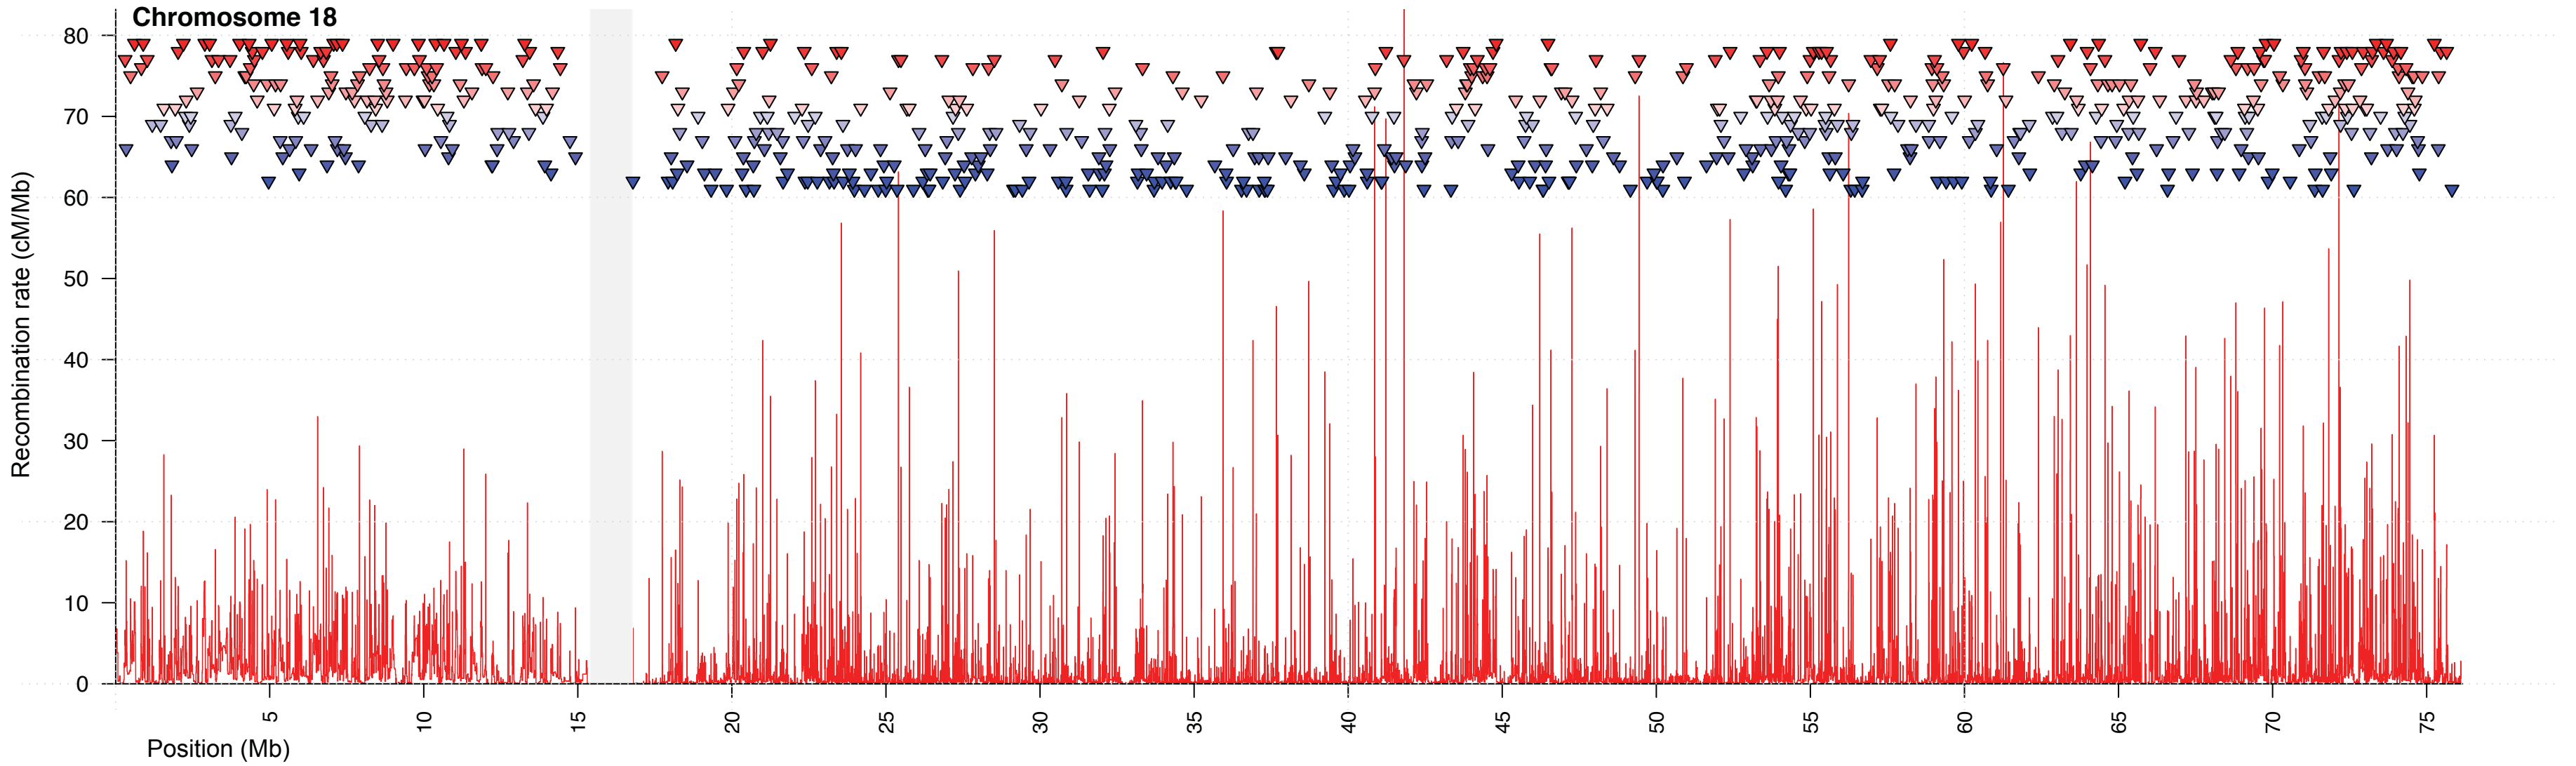

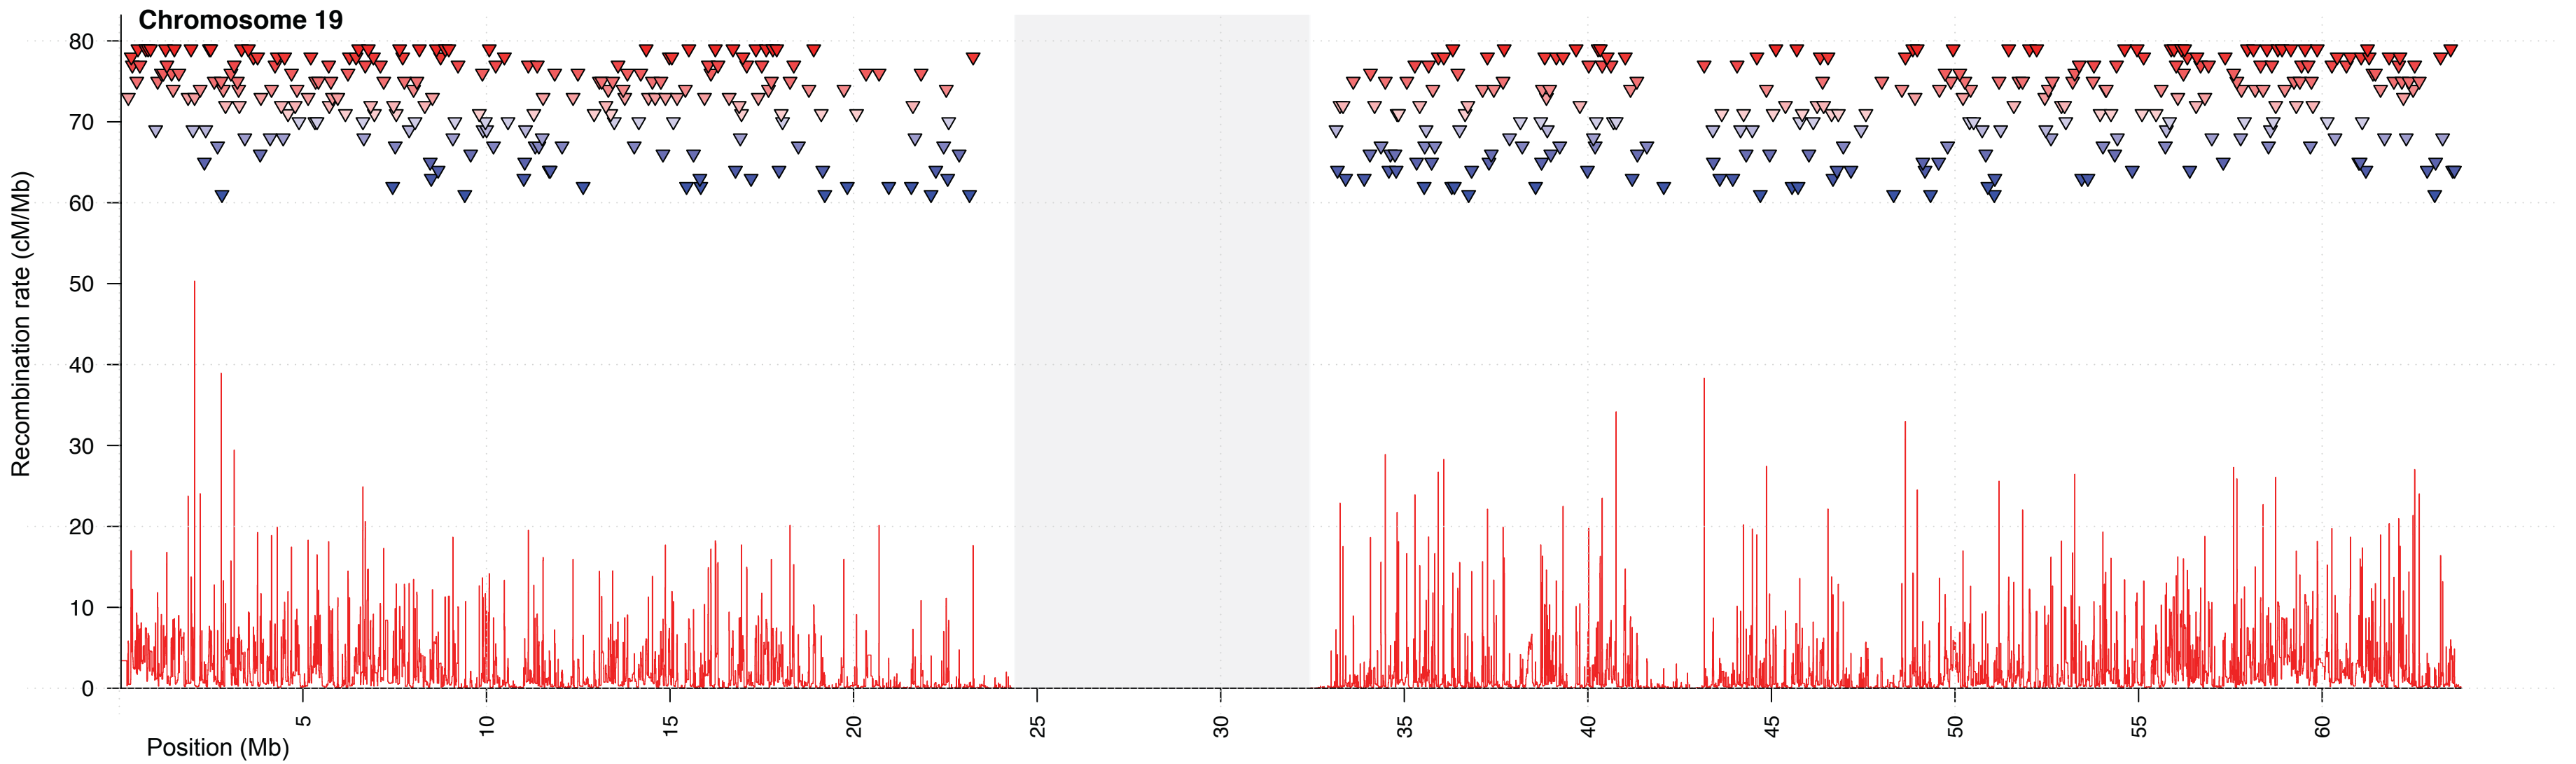

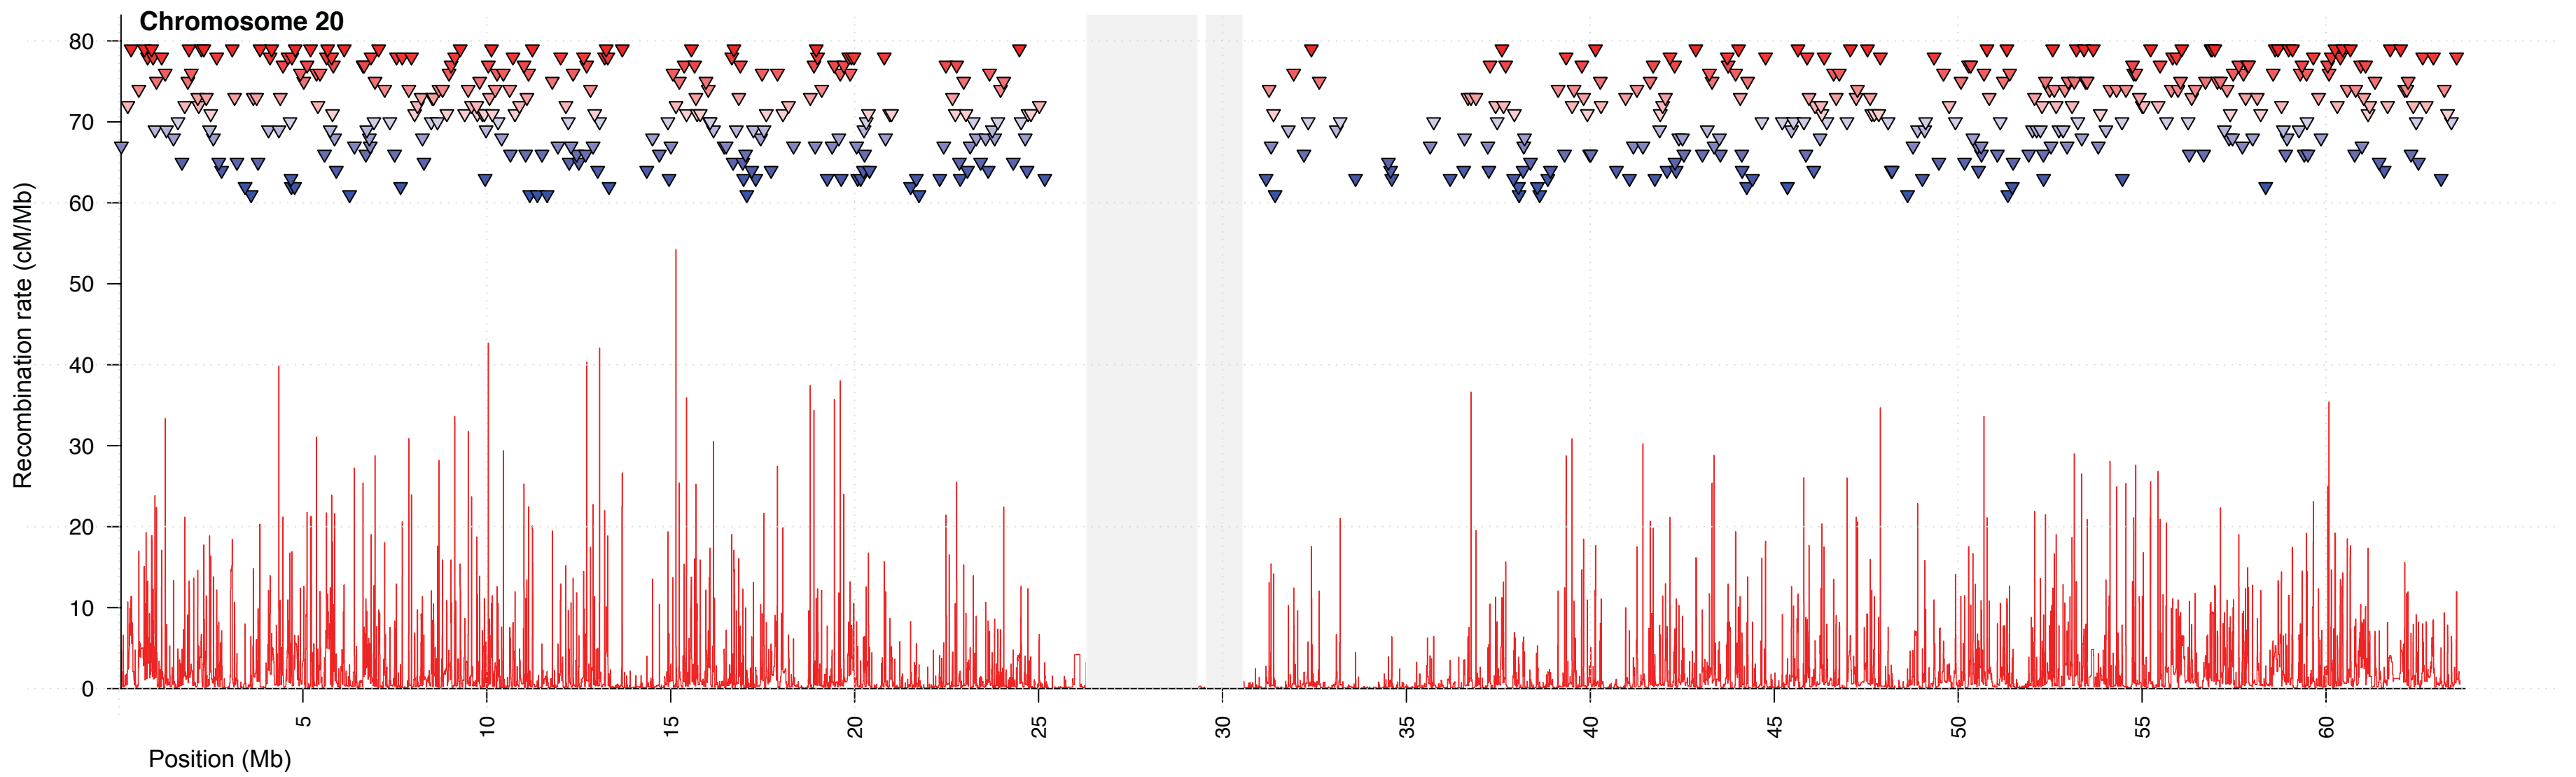

# Chromosome 21

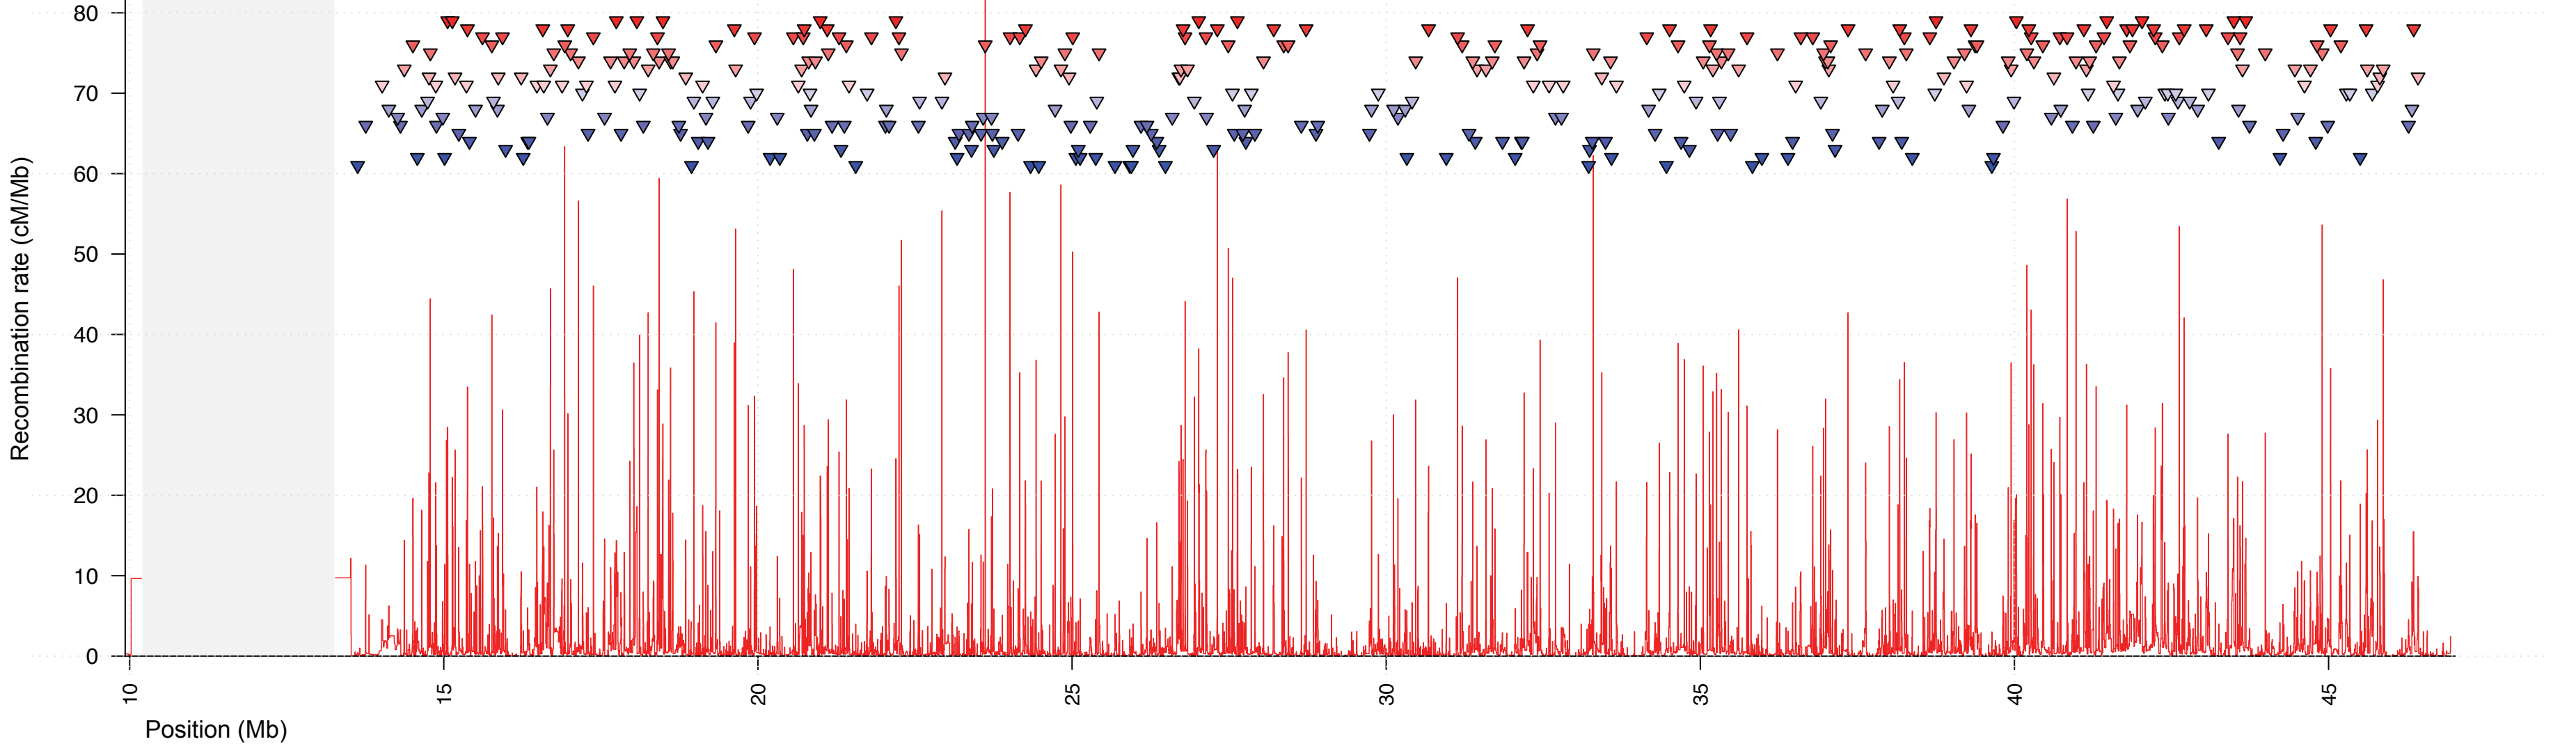

# Chromosome 22

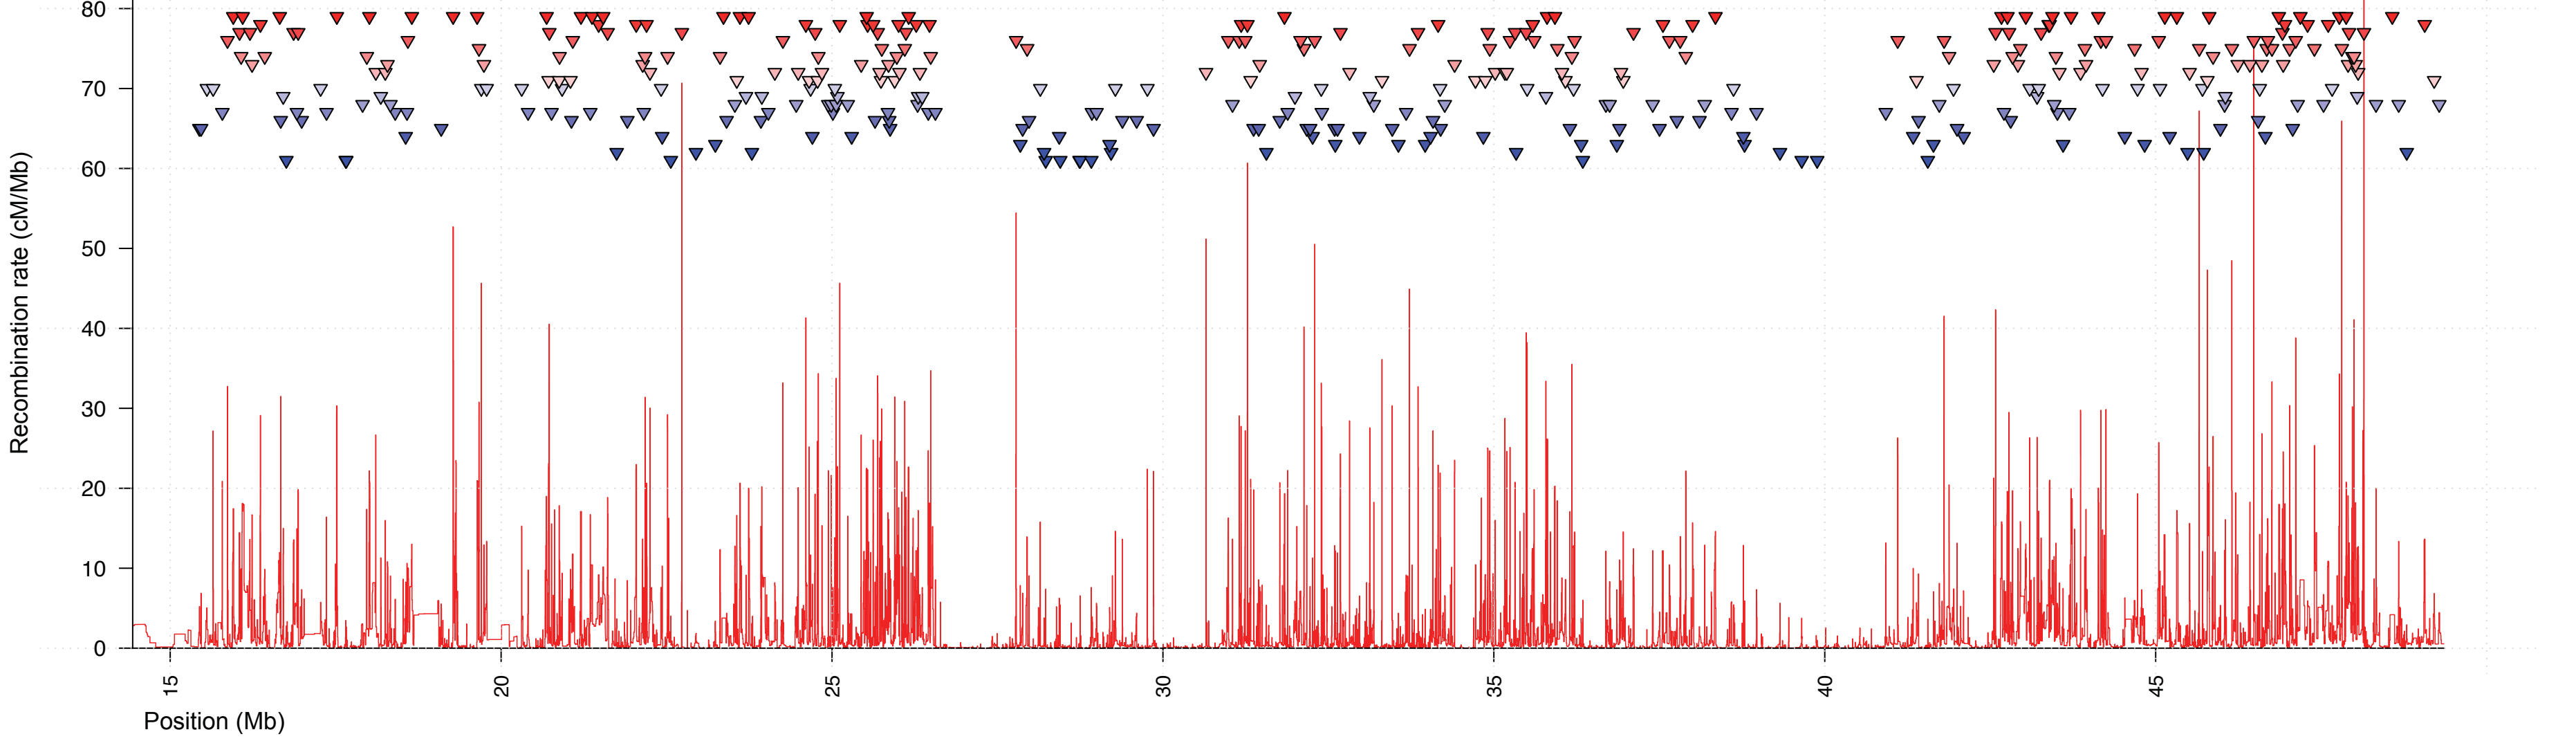

# Chromosome X

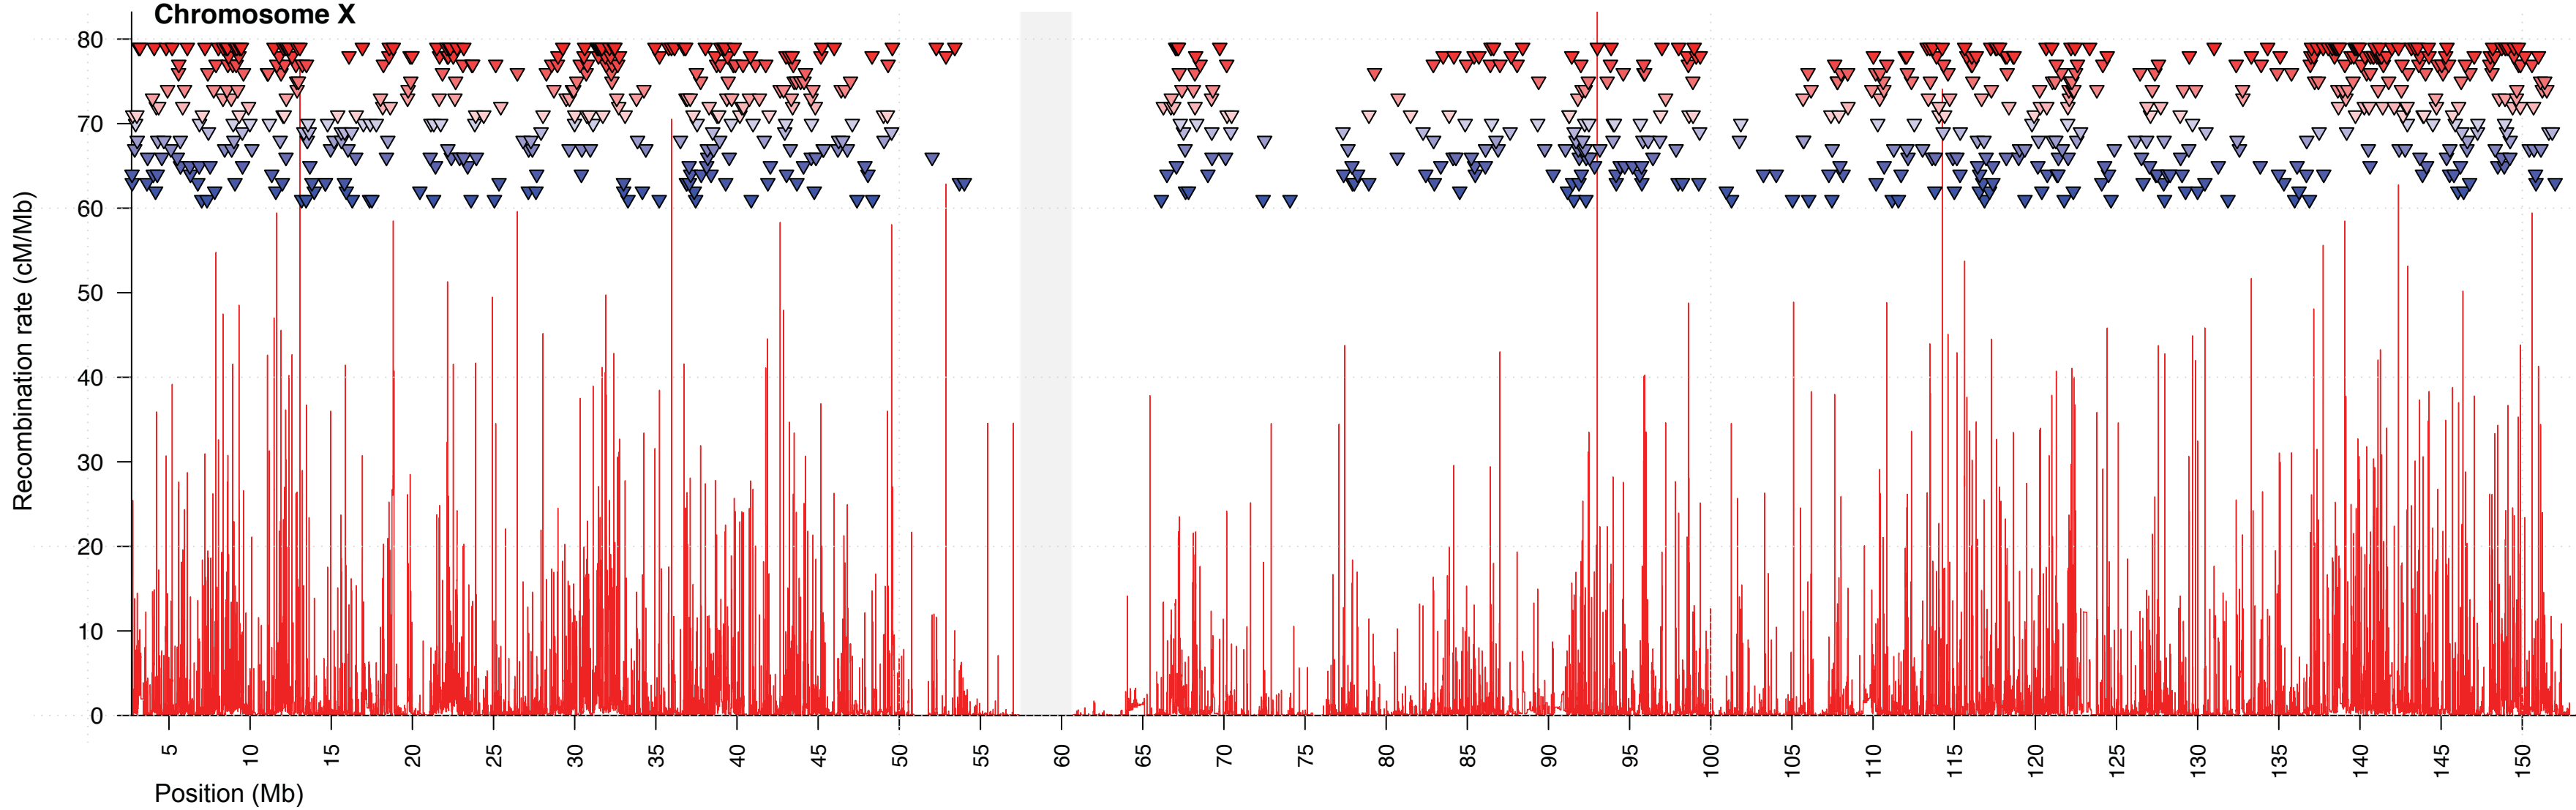

Supplement: 41586_2005_BFnature04226_MOESM13_ESM.pdf [file 41586_2005_BFnature04226_MOESM13_ESM.pdf]
