# Supplementary figures and images for: A haplotype map of the human genome
Source: Springer Nature journal article supplement (doi:10.1038/nature04226), 2005-10-01

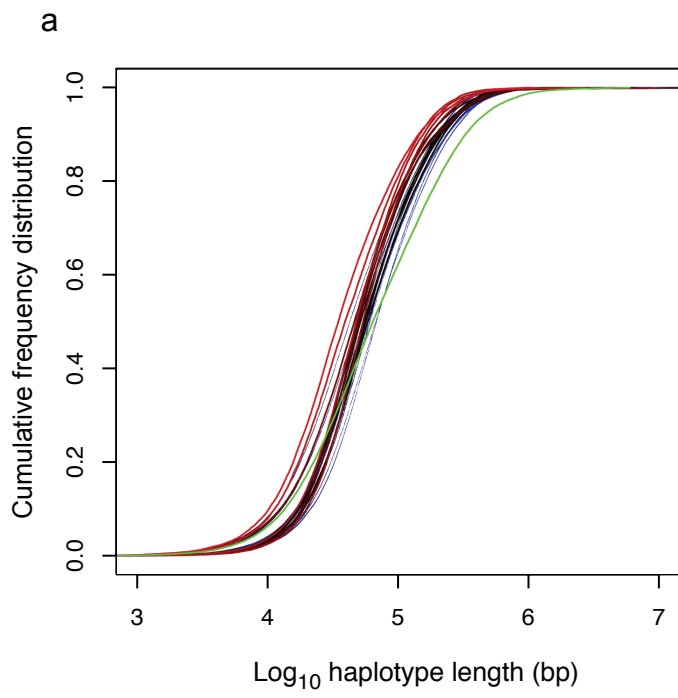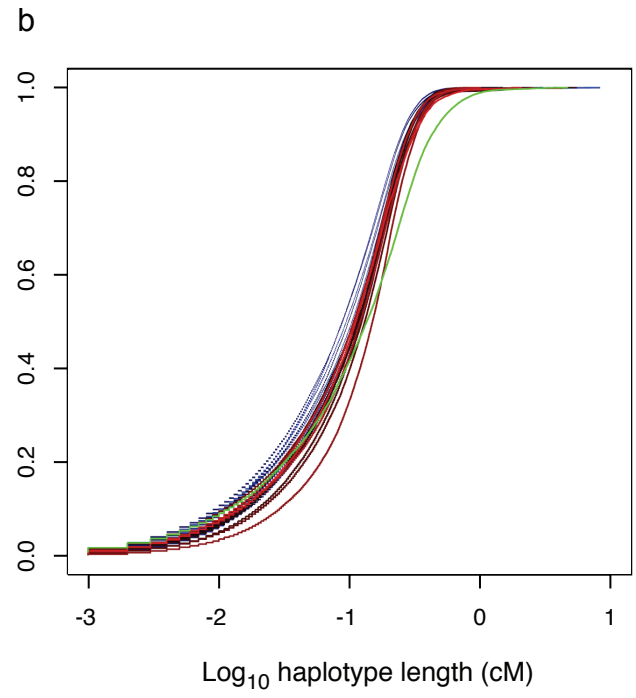

Supplement: 41586_2005_BFnature04226_MOESM10_ESM.pdf [file 41586_2005_BFnature04226_MOESM10_ESM.pdf]

### YRI

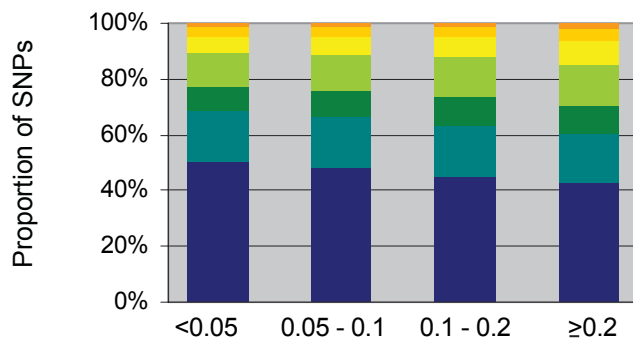

### CEU

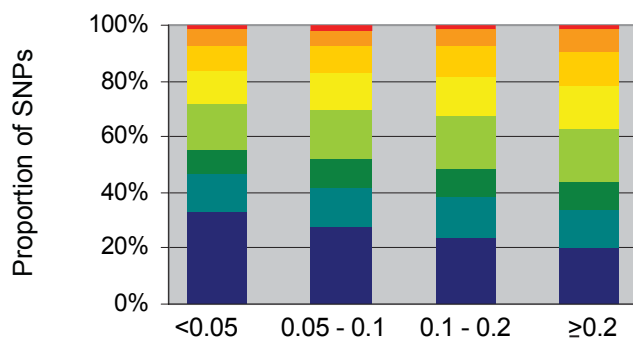

### CHB+JPT

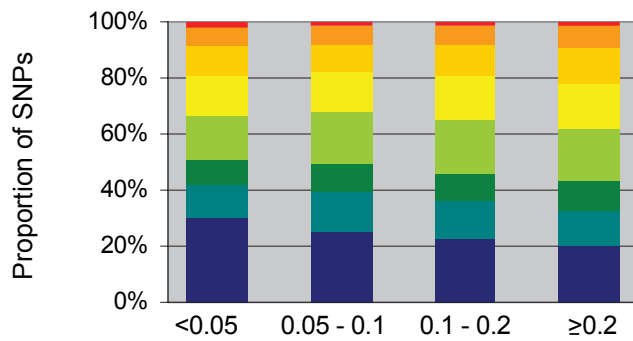

Minor allele frequency

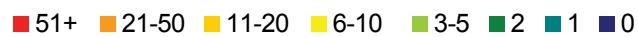

Supplement: 41586_2005_BFnature04226_MOESM11_ESM.pdf [file 41586_2005_BFnature04226_MOESM11_ESM.pdf]

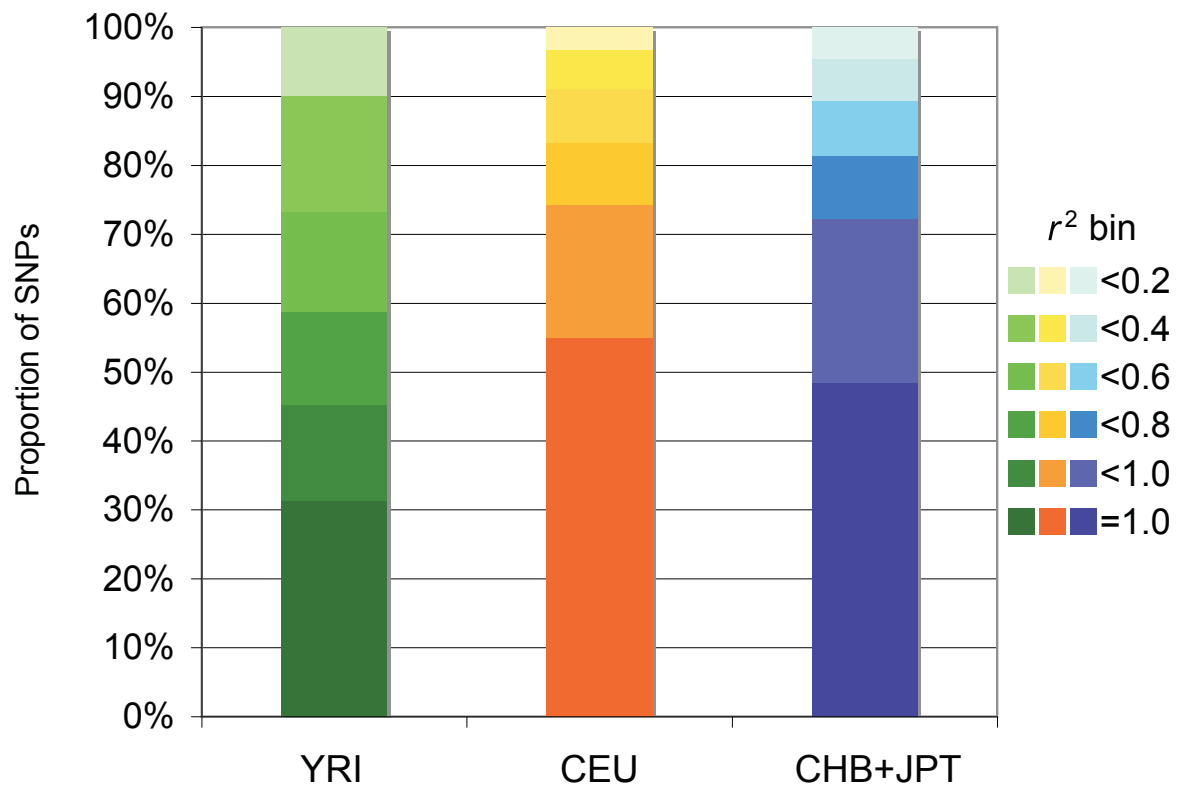

Supplement: 41586_2005_BFnature04226_MOESM12_ESM.pdf [file 41586_2005_BFnature04226_MOESM12_ESM.pdf]

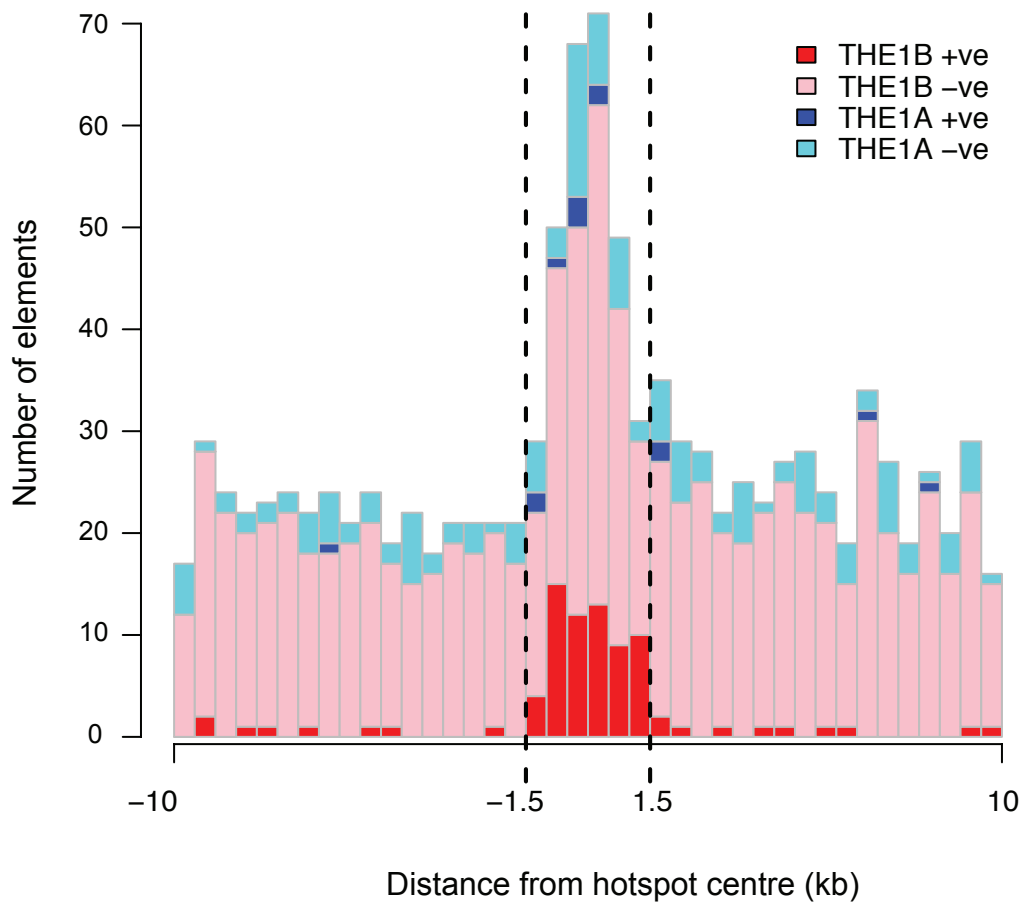

Supplement: 41586_2005_BFnature04226_MOESM14_ESM.pdf [file 41586_2005_BFnature04226_MOESM14_ESM.pdf]

a YRI

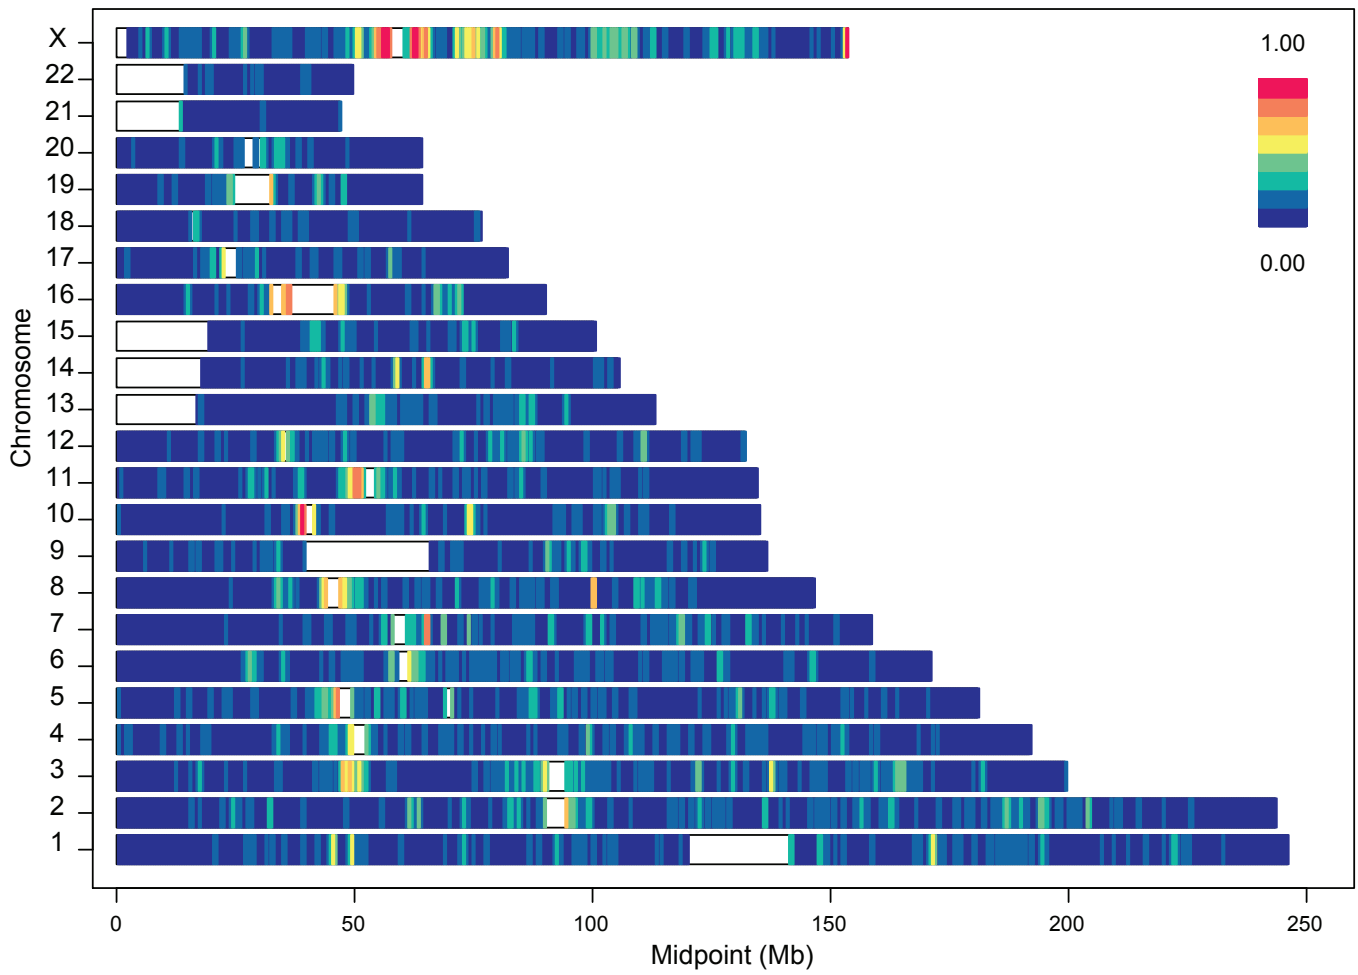

b CEU

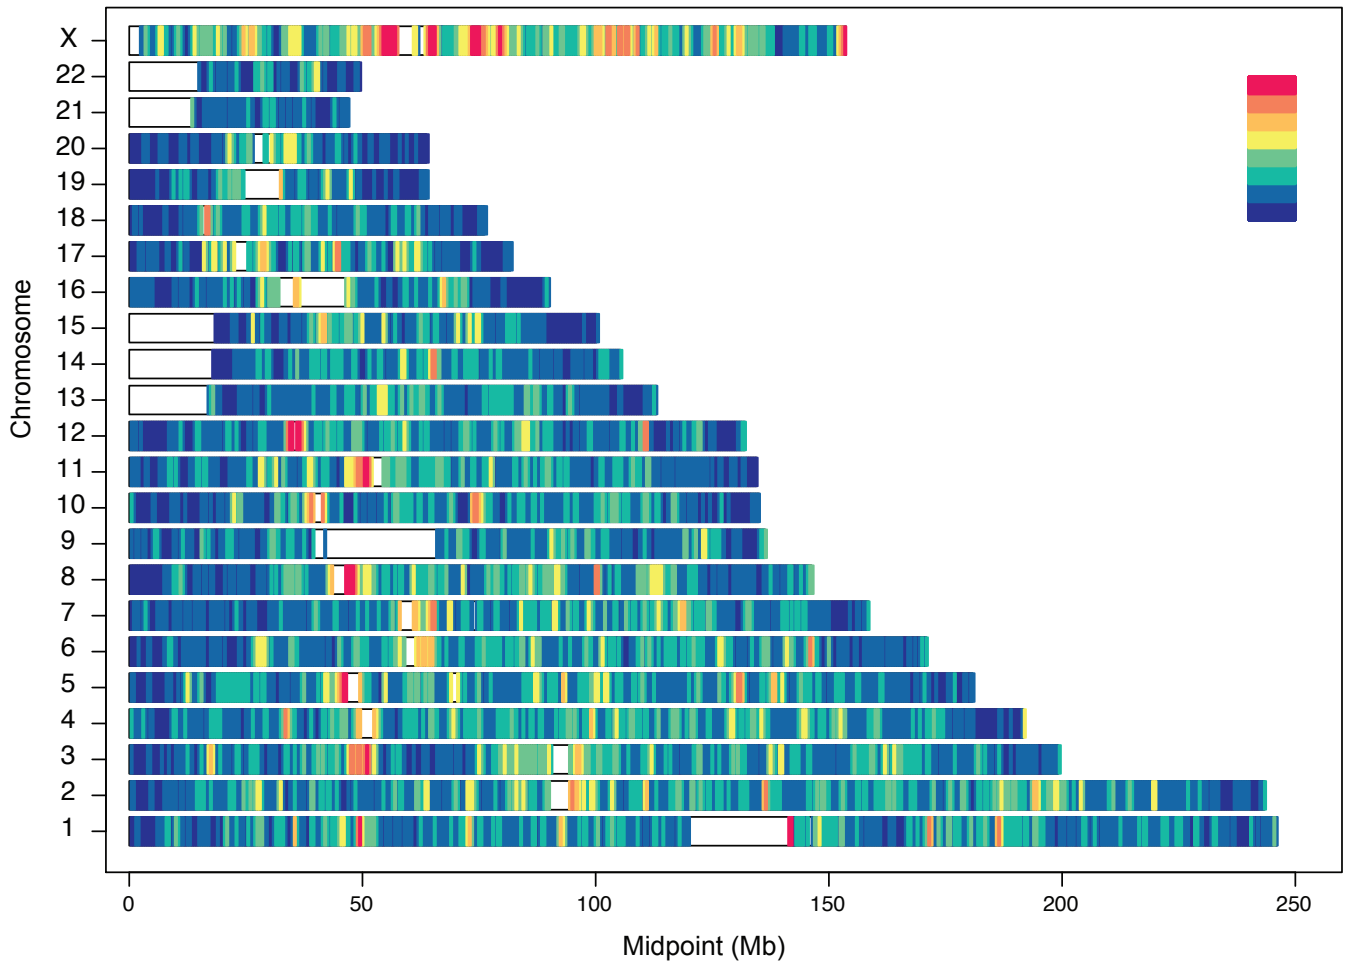

Supplement: 41586_2005_BFnature04226_MOESM15_ESM.pdf [file 41586_2005_BFnature04226_MOESM15_ESM.pdf]

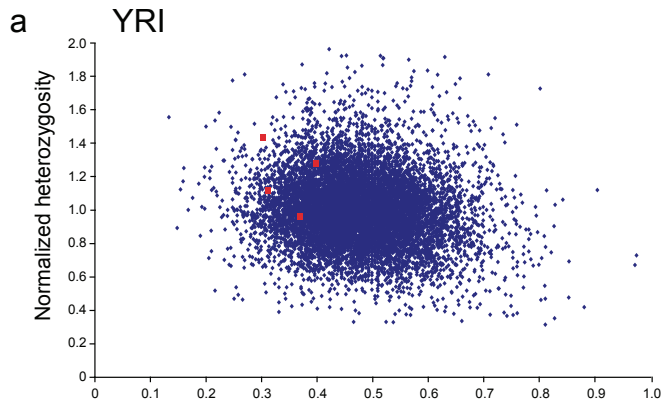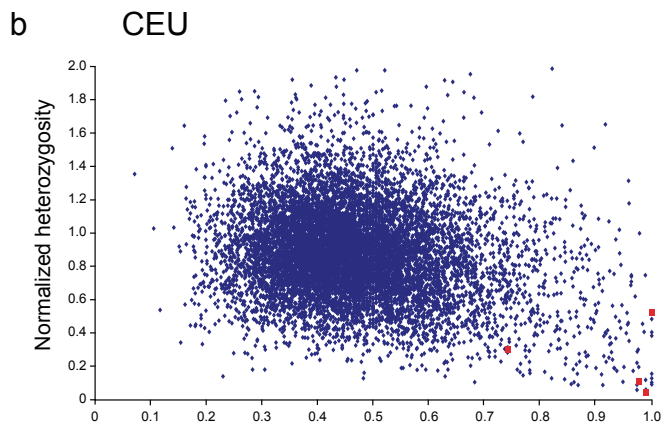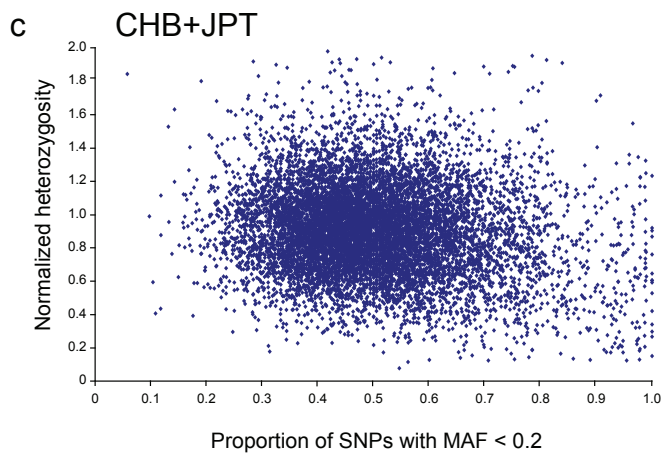

Supplement: 41586_2005_BFnature04226_MOESM16_ESM.pdf [file 41586_2005_BFnature04226_MOESM16_ESM.pdf]

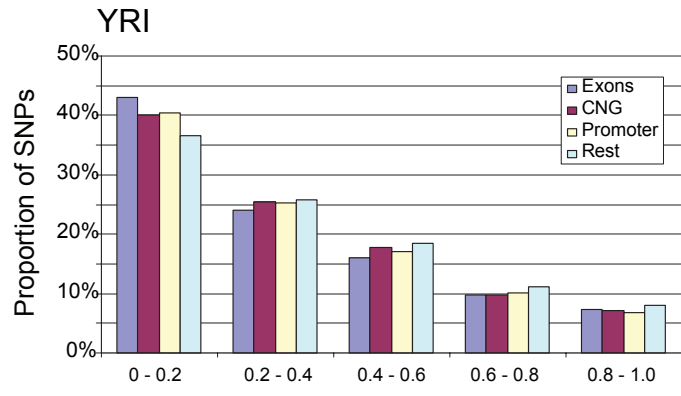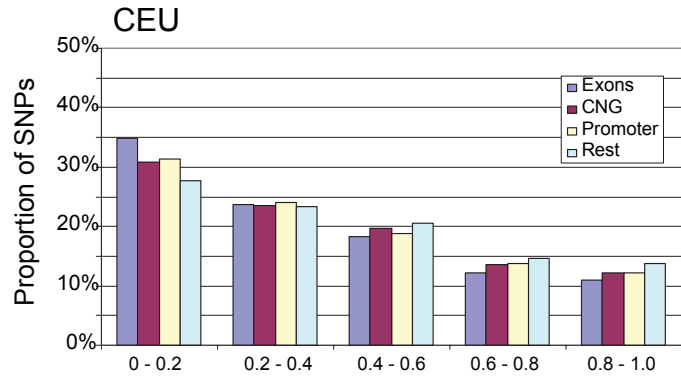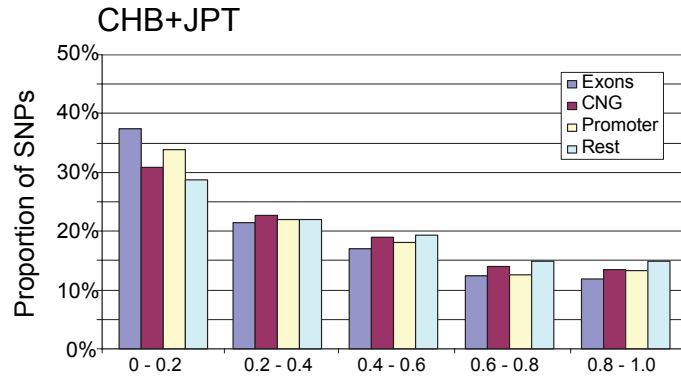

Derived allele frequency

Supplement: 41586_2005_BFnature04226_MOESM17_ESM.pdf [file 41586_2005_BFnature04226_MOESM17_ESM.pdf]

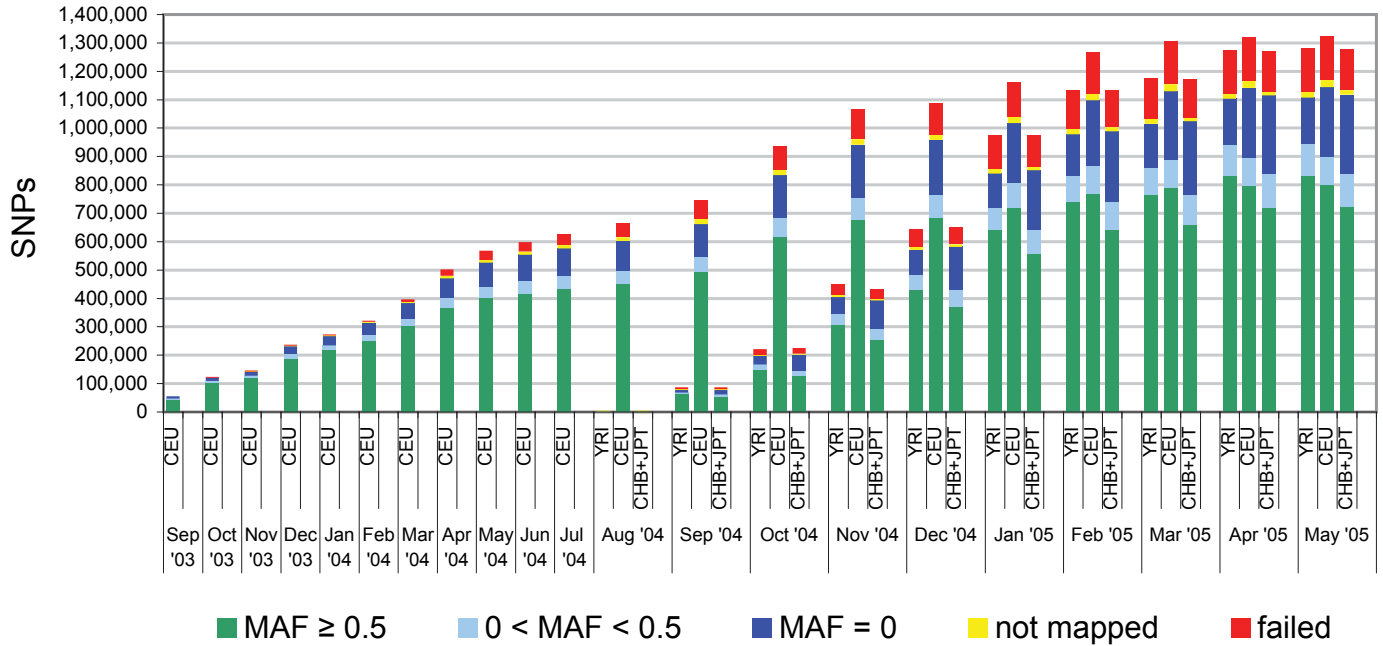

Supplement: 41586_2005_BFnature04226_MOESM18_ESM.pdf [file 41586_2005_BFnature04226_MOESM18_ESM.pdf]

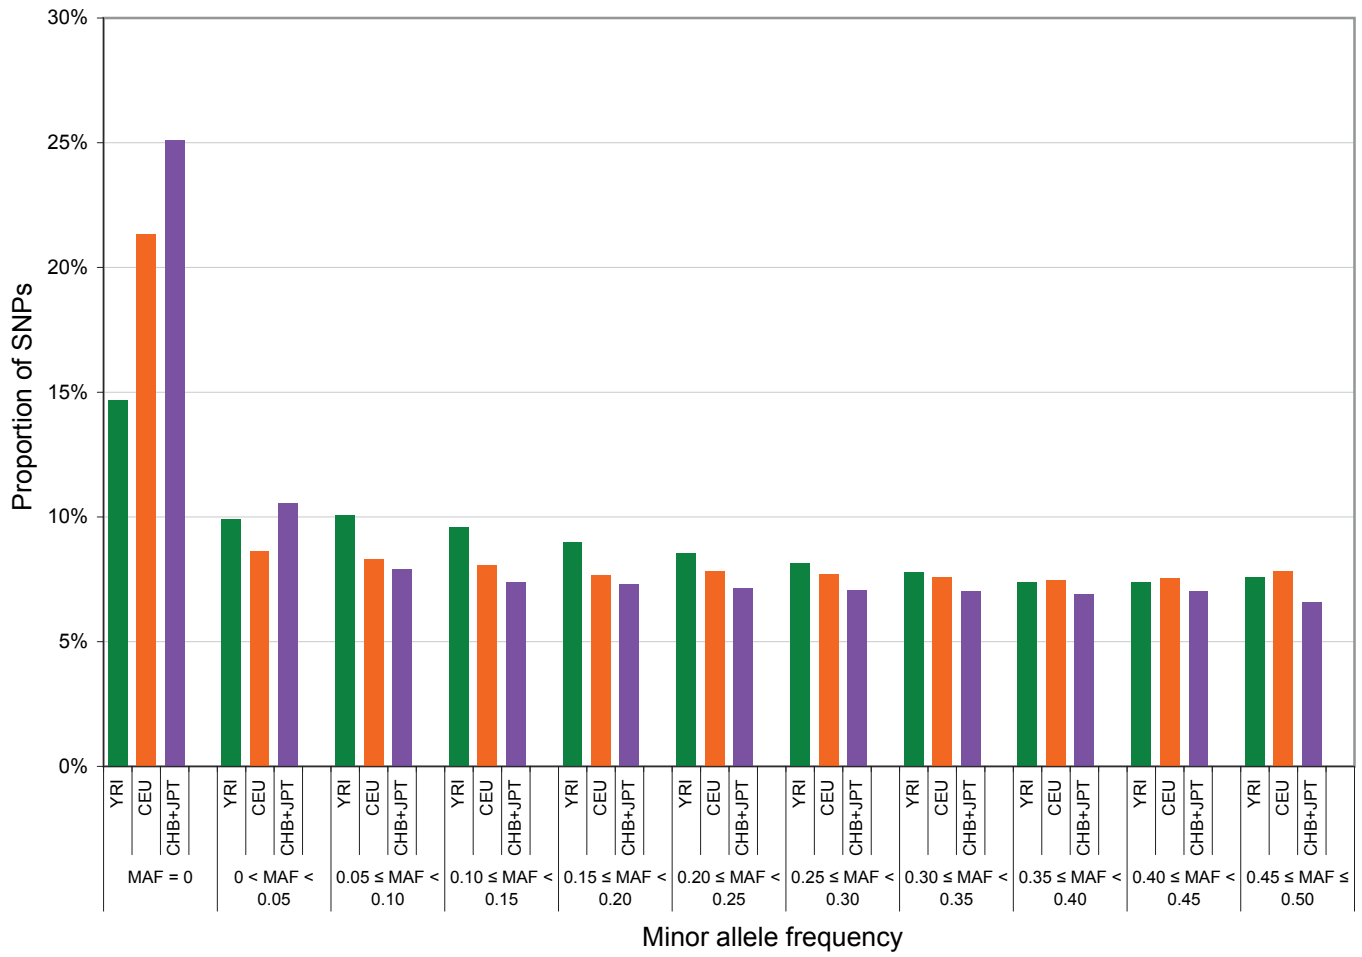

Supplement: 41586_2005_BFnature04226_MOESM19_ESM.pdf [file 41586_2005_BFnature04226_MOESM19_ESM.pdf]

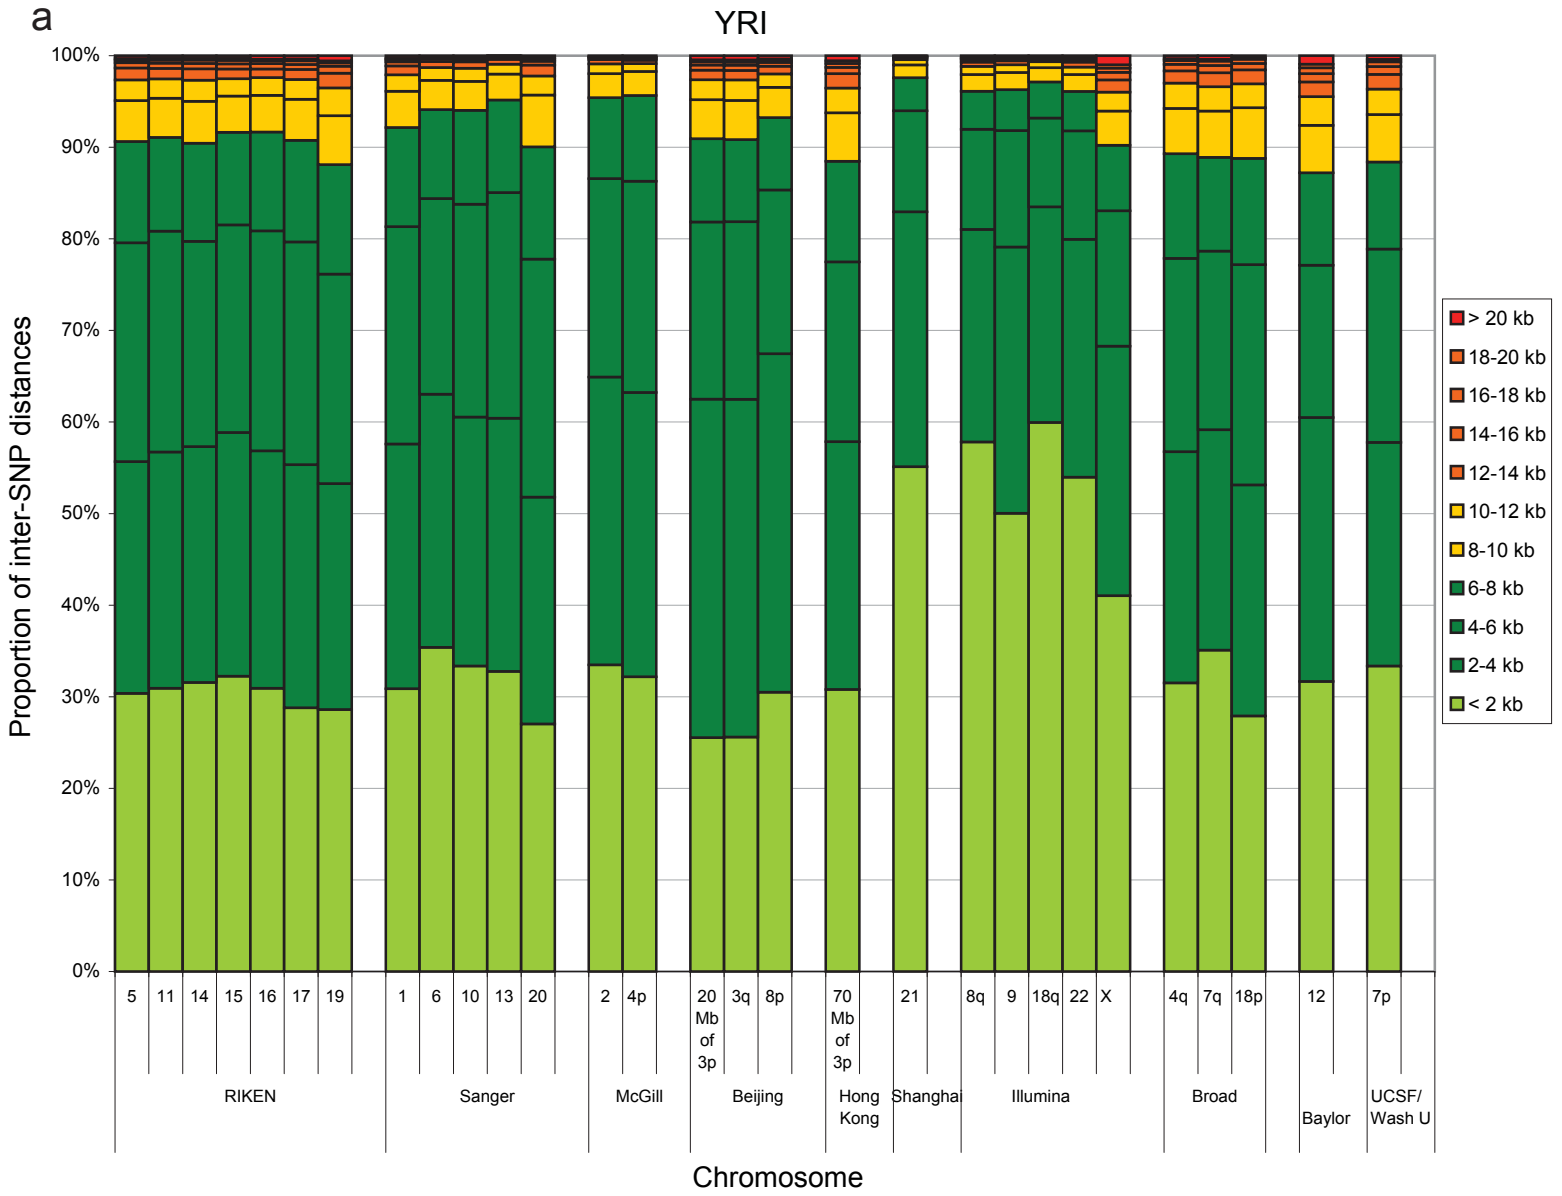

b

CEU

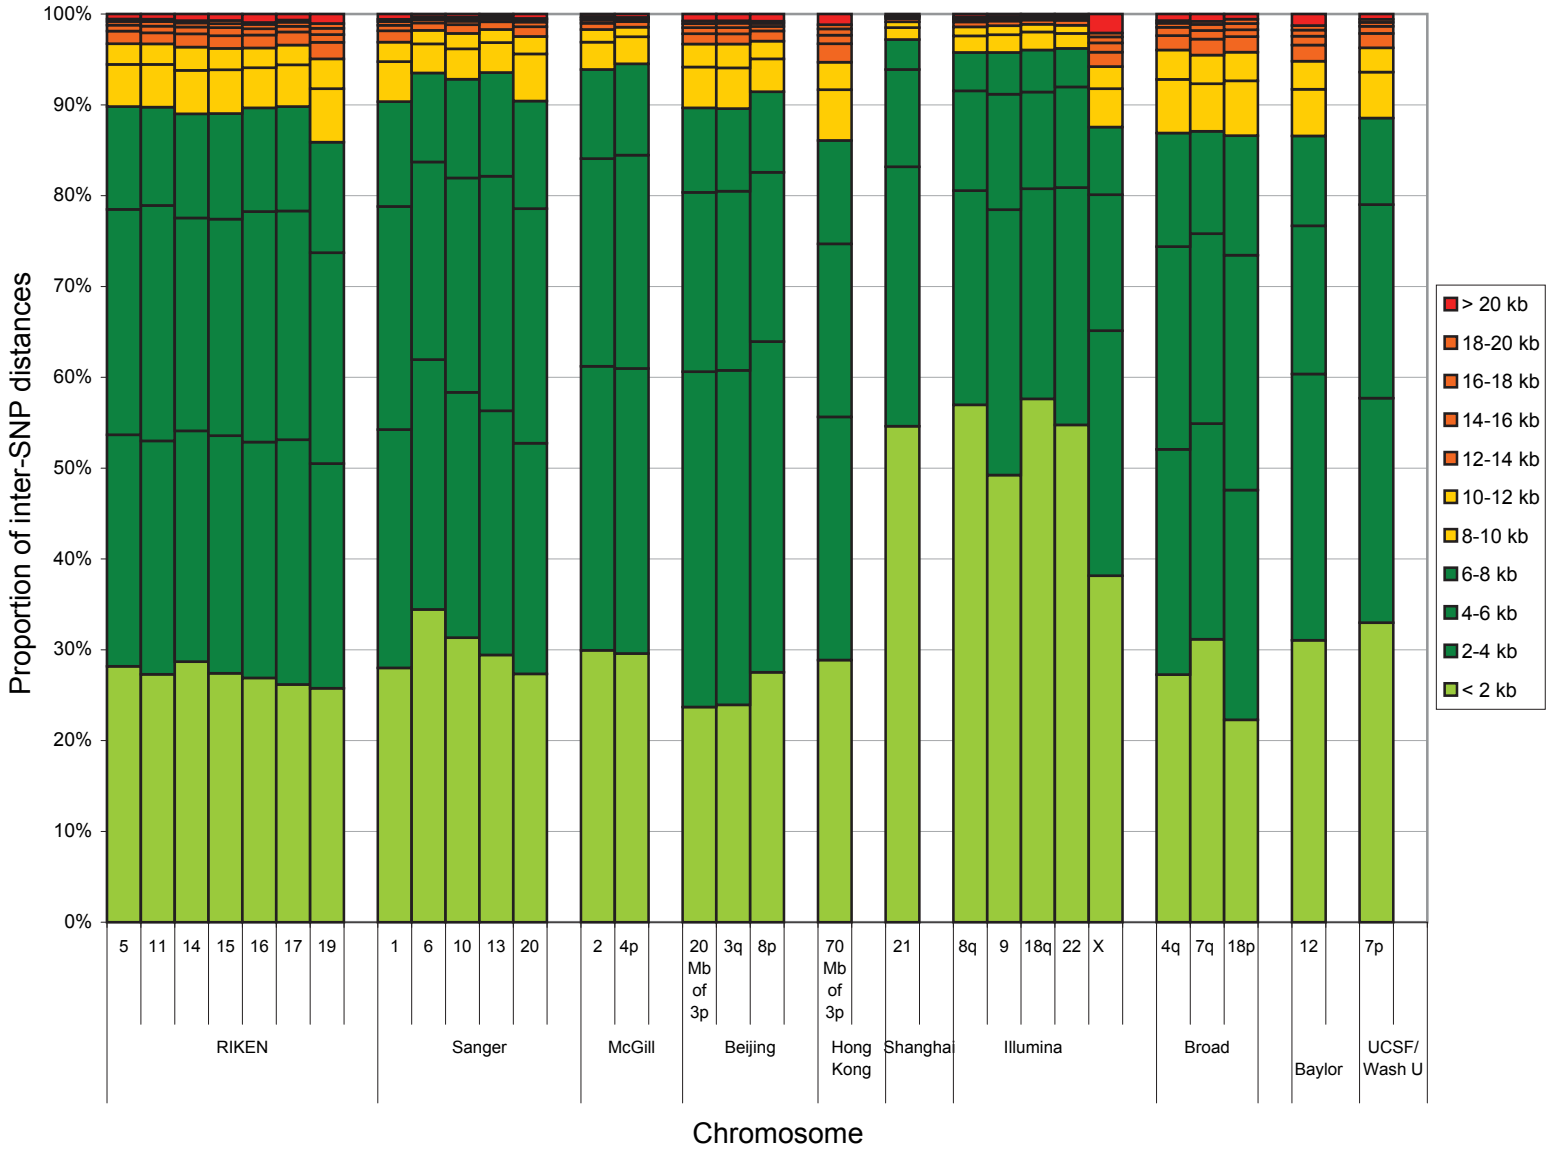

C

CHB+JPT

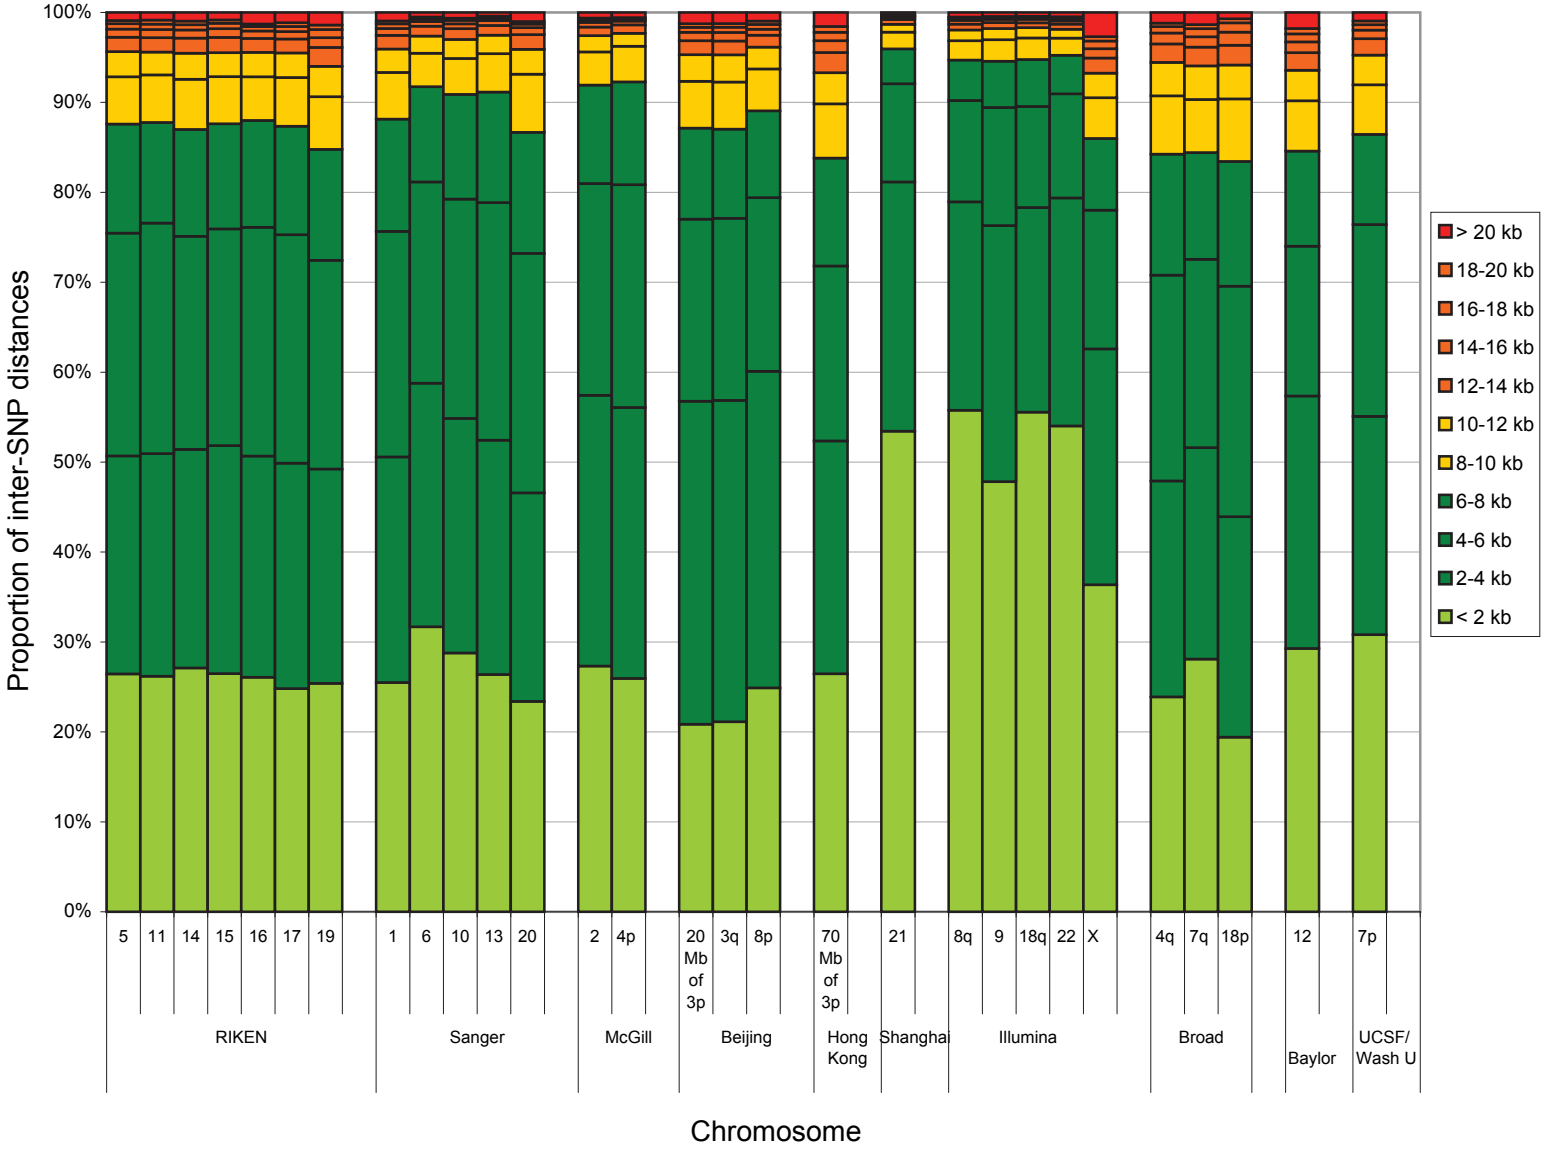

Supplement: 41586_2005_BFnature04226_MOESM20_ESM.pdf [file 41586_2005_BFnature04226_MOESM20_ESM.pdf]

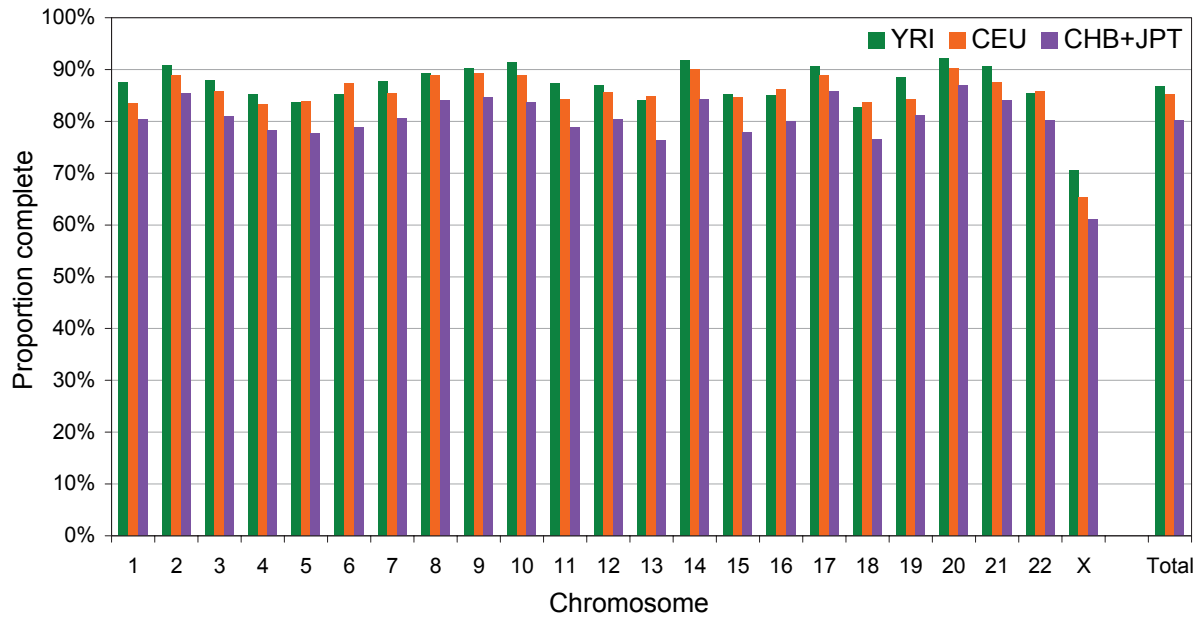

Supplement: 41586_2005_BFnature04226_MOESM2_ESM.pdf [file 41586_2005_BFnature04226_MOESM2_ESM.pdf]

**a All SNPs**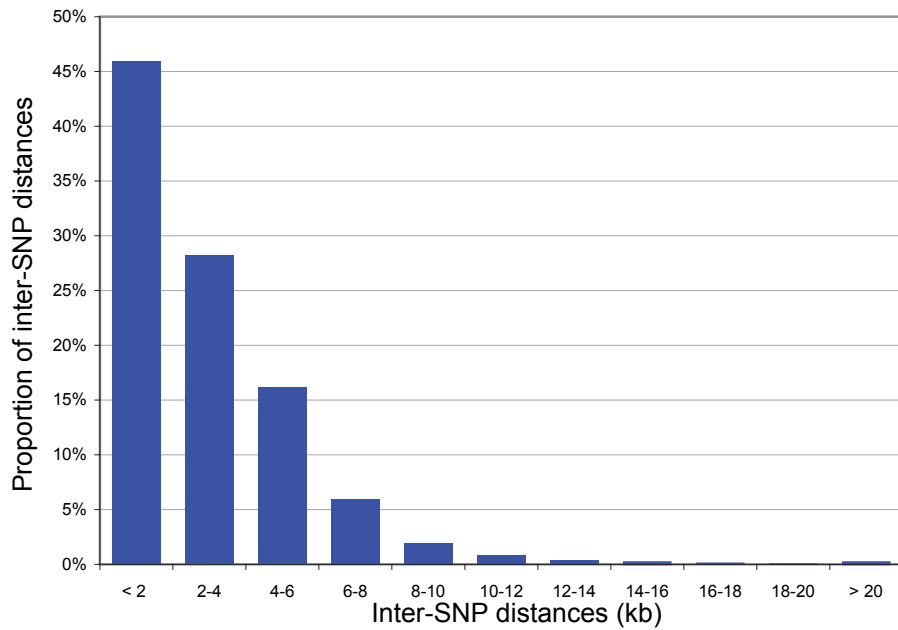**b SNPs with MAF  $\geq 0.1$** 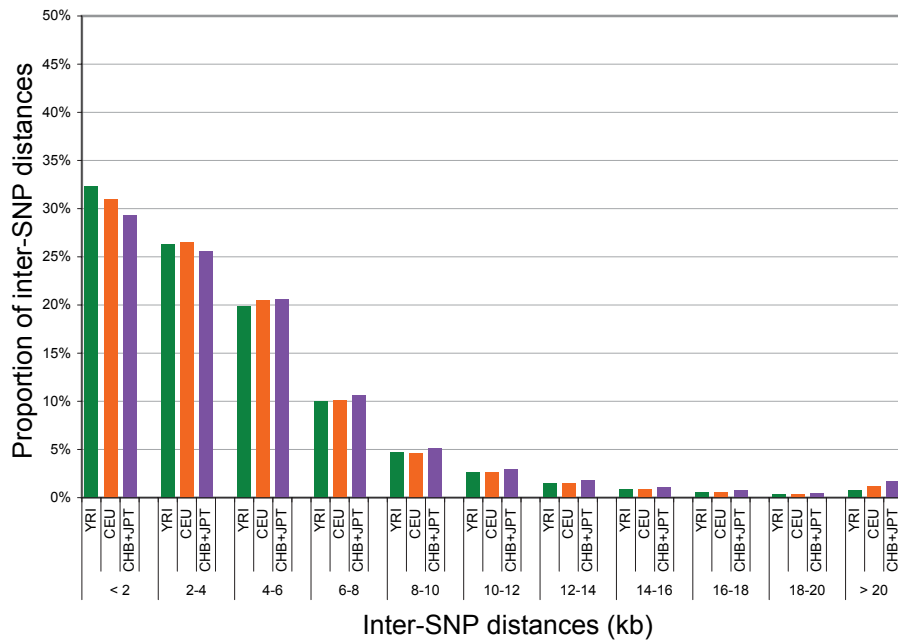**c SNPs with MAF  $\geq 0.2$** 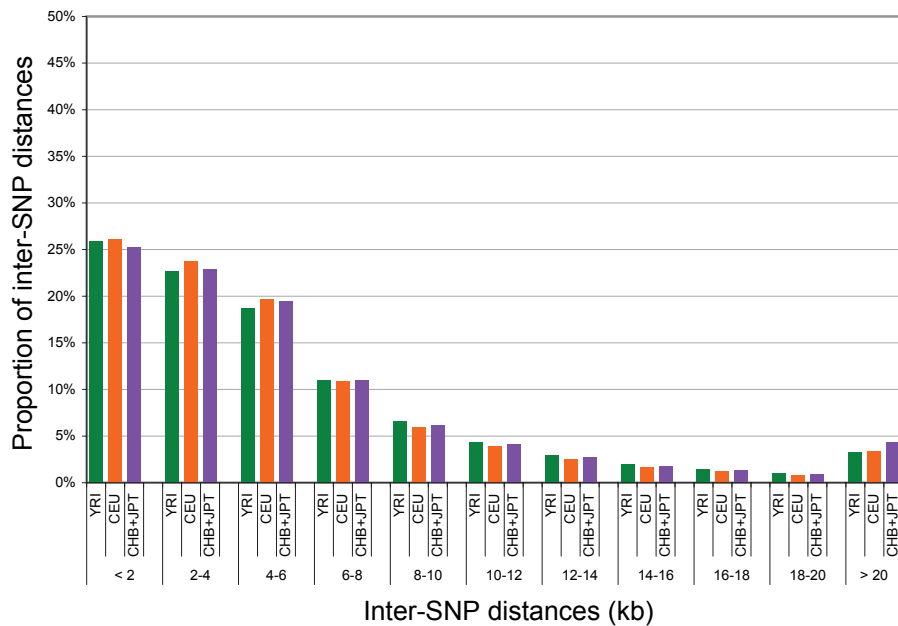

Supplement: 41586_2005_BFnature04226_MOESM3_ESM.pdf [file 41586_2005_BFnature04226_MOESM3_ESM.pdf]

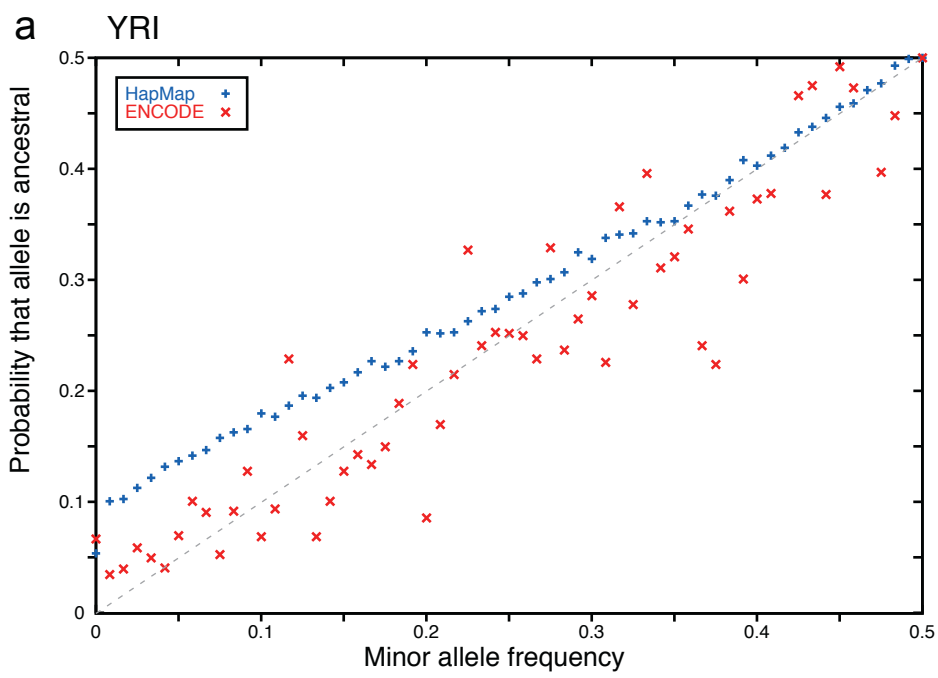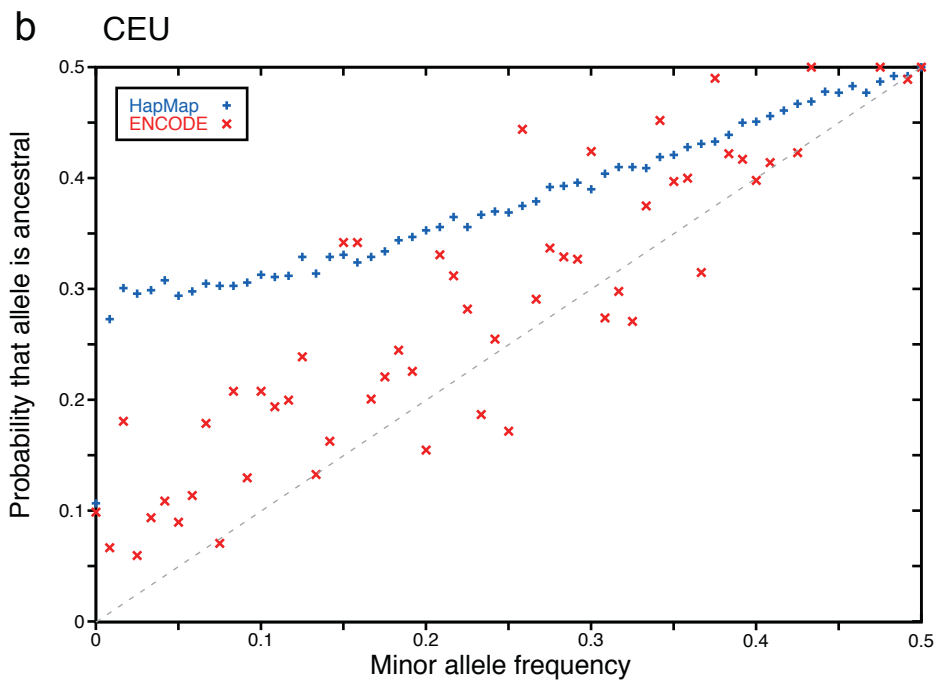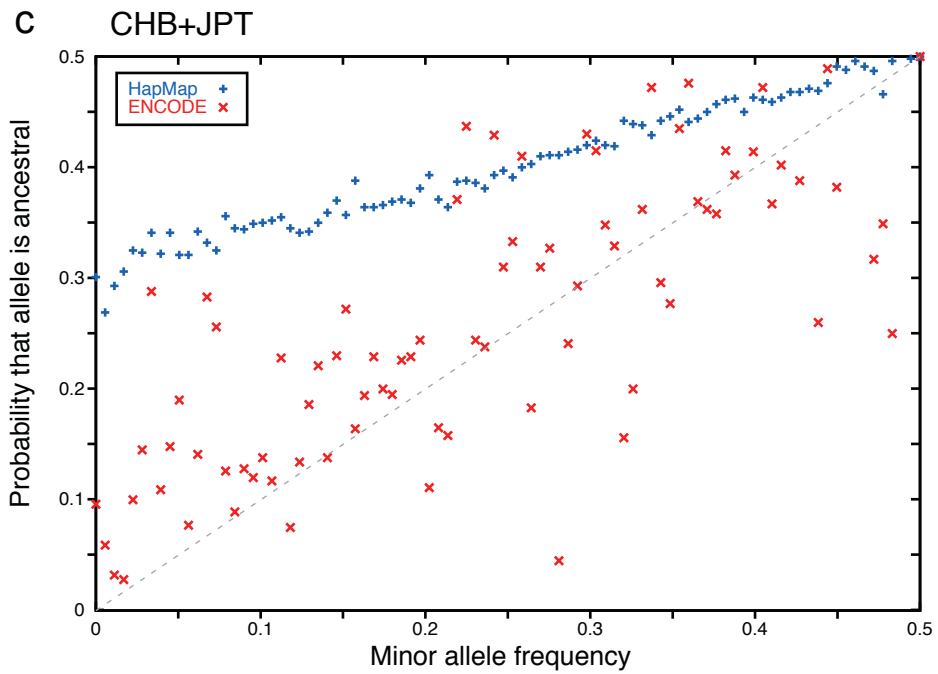

Supplement: 41586_2005_BFnature04226_MOESM4_ESM.pdf [file 41586_2005_BFnature04226_MOESM4_ESM.pdf]

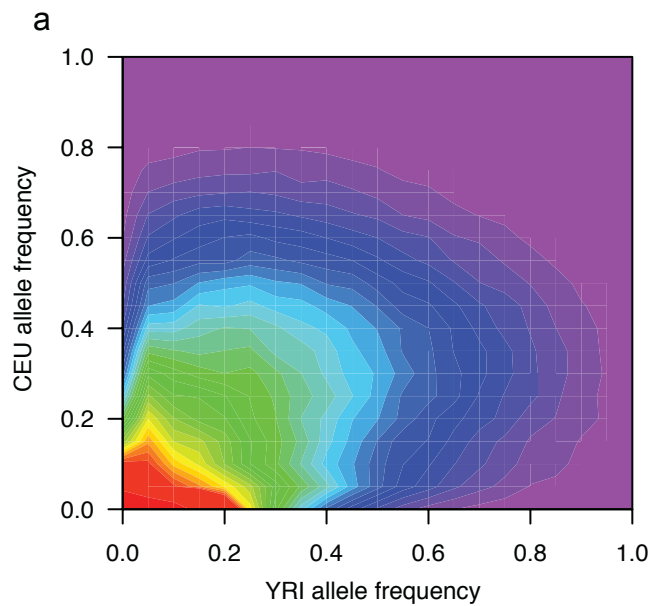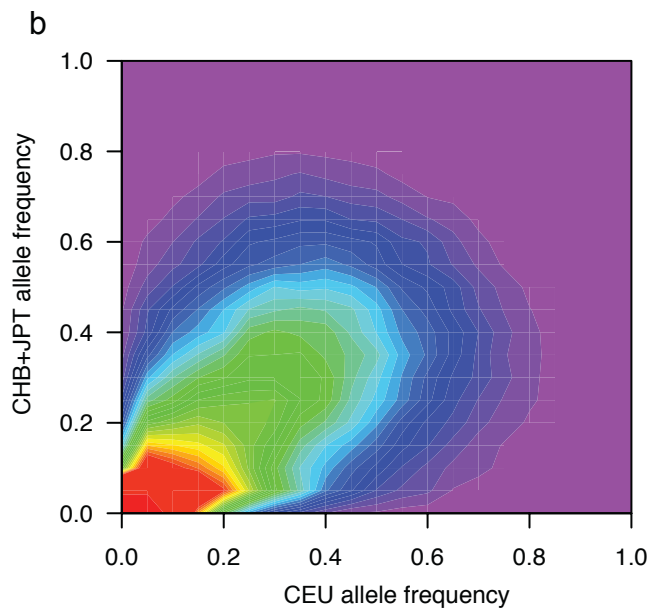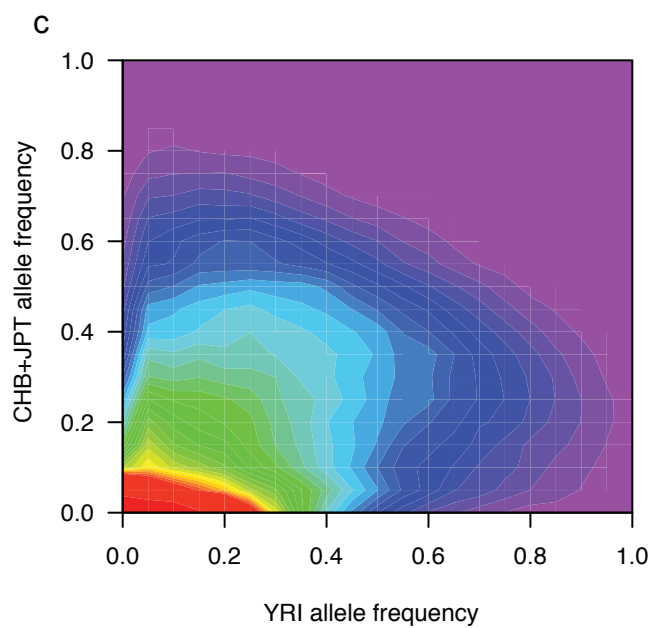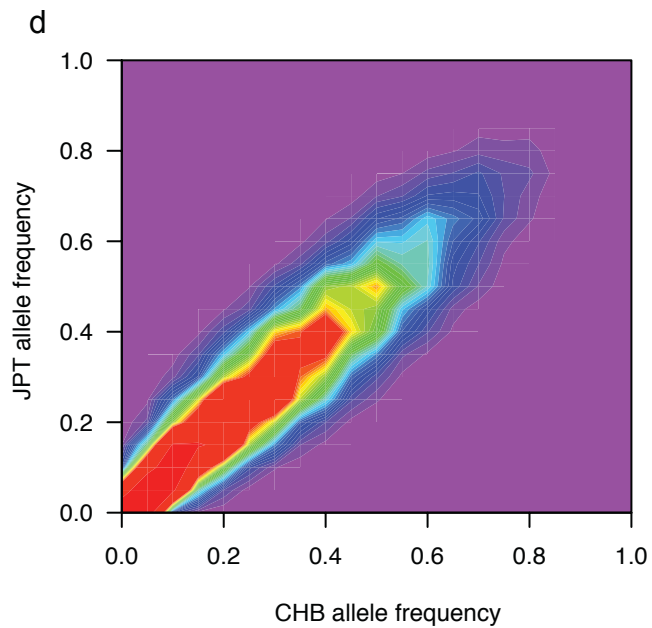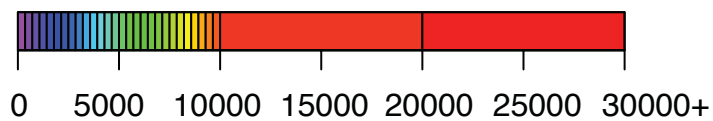

Supplement: 41586_2005_BFnature04226_MOESM5_ESM.pdf [file 41586_2005_BFnature04226_MOESM5_ESM.pdf]

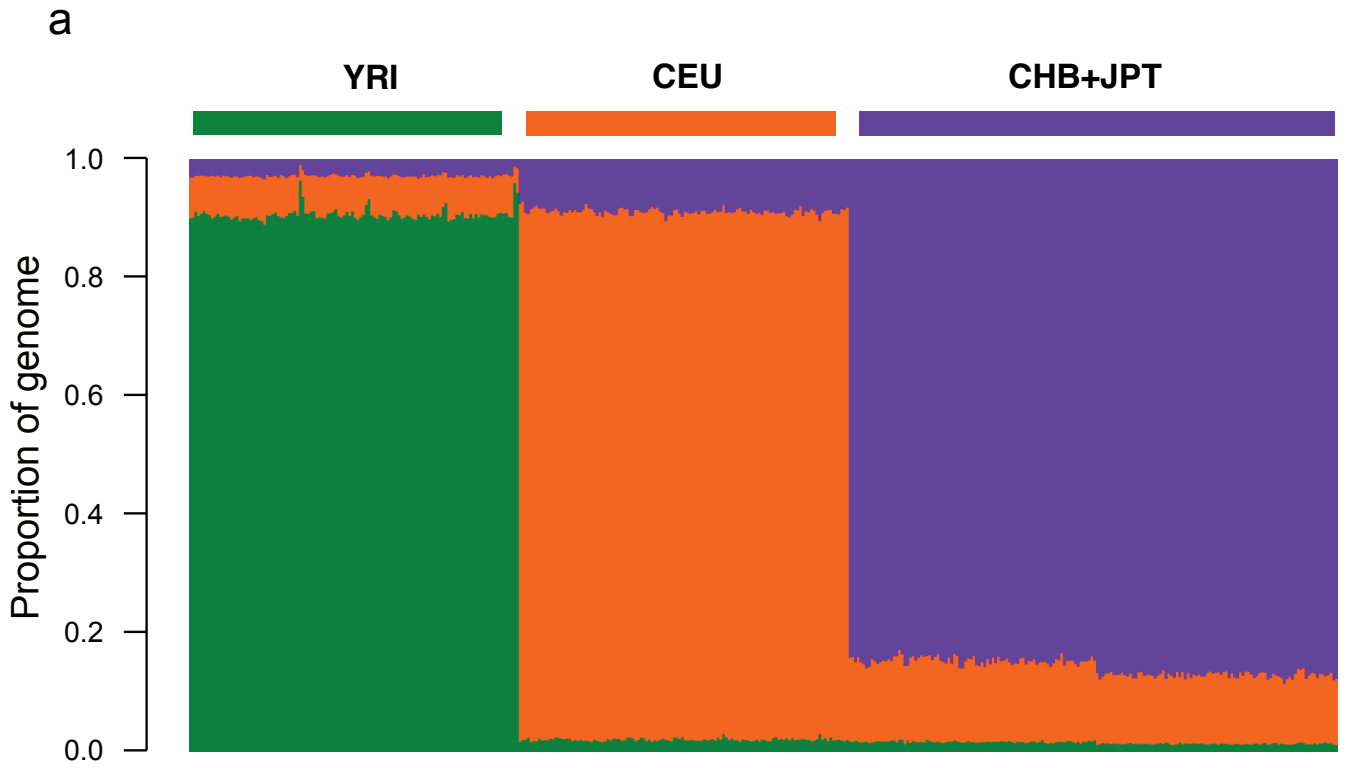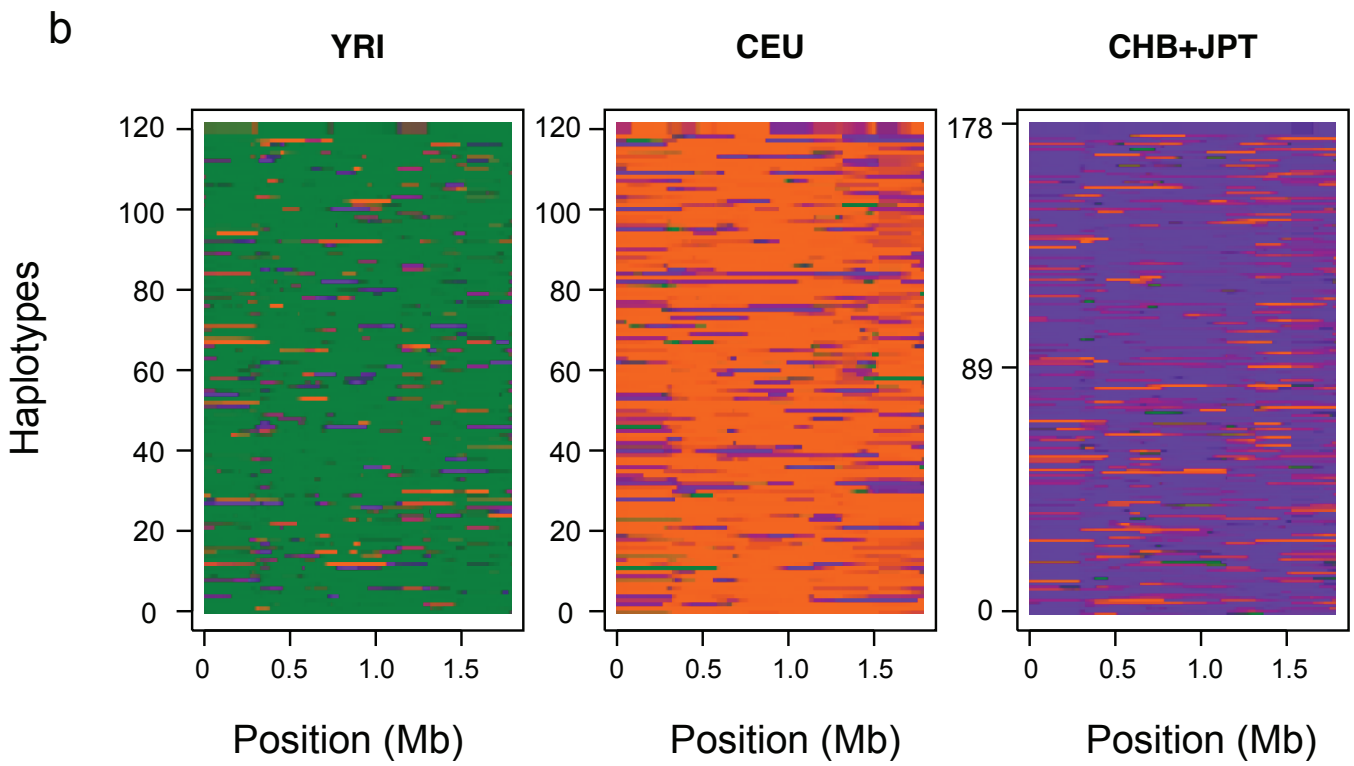

Supplement: 41586_2005_BFnature04226_MOESM6_ESM.pdf [file 41586_2005_BFnature04226_MOESM6_ESM.pdf]

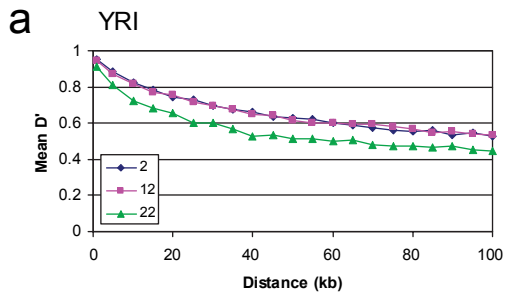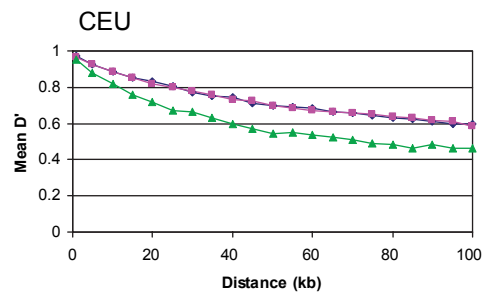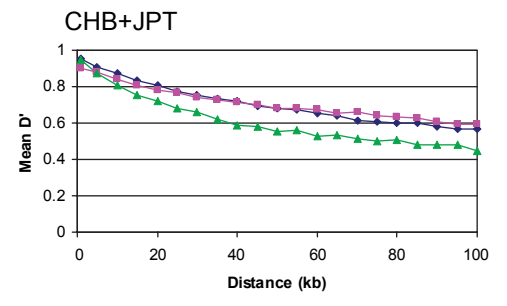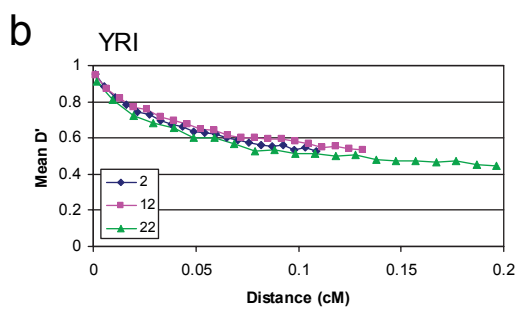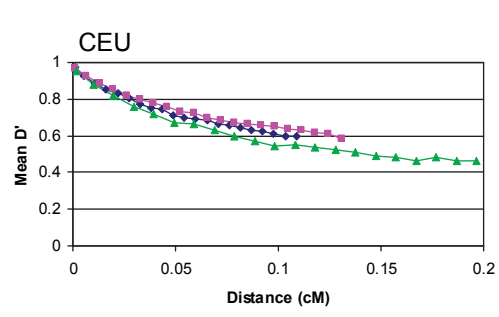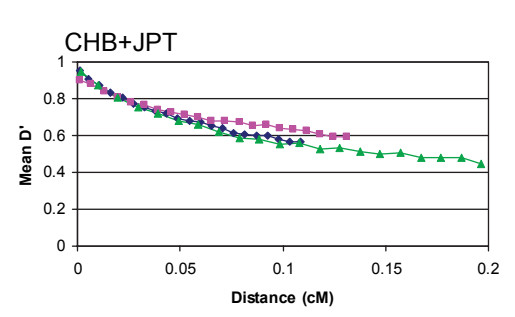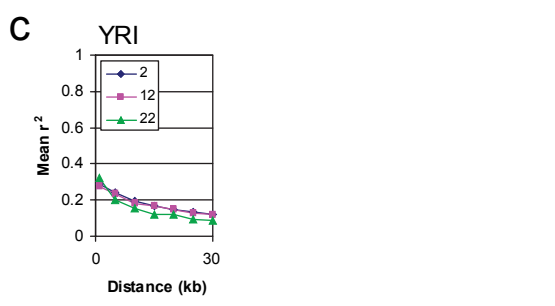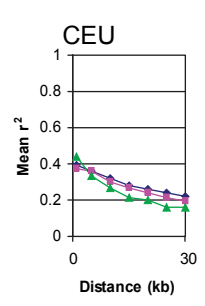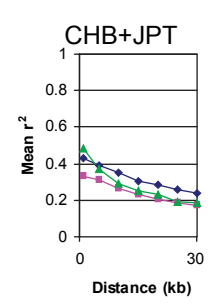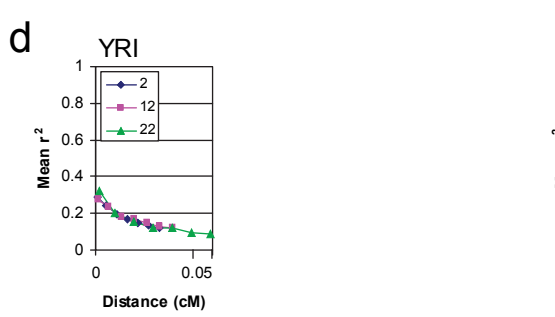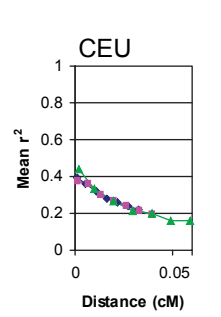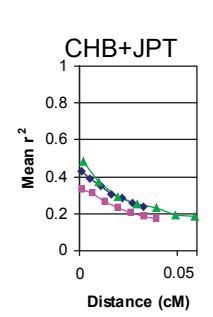

Supplement: 41586_2005_BFnature04226_MOESM7_ESM.pdf [file 41586_2005_BFnature04226_MOESM7_ESM.pdf]

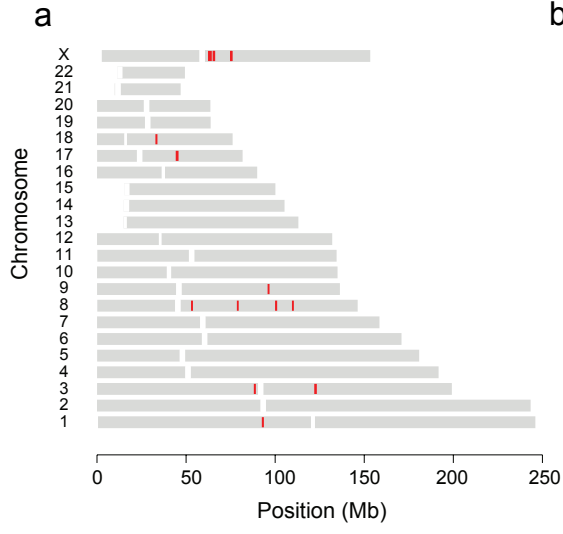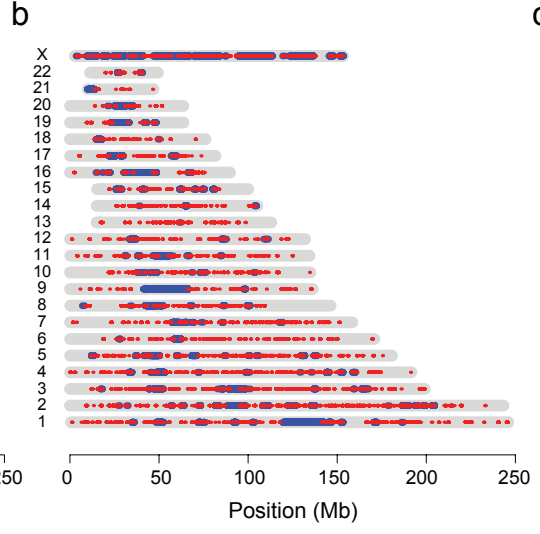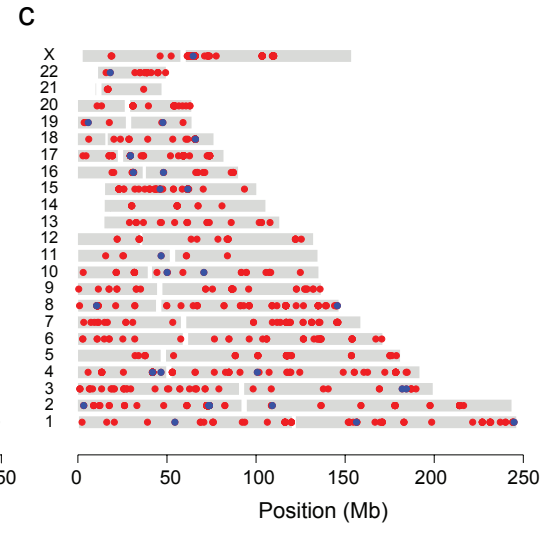

Supplement: 41586_2005_BFnature04226_MOESM9_ESM.pdf [file 41586_2005_BFnature04226_MOESM9_ESM.pdf]
